# Supplementary material
Source: ML conference proceedings conference paper supplement (https://openreview.net/forum?id=xqNCTr9kqg)

100 Iterations

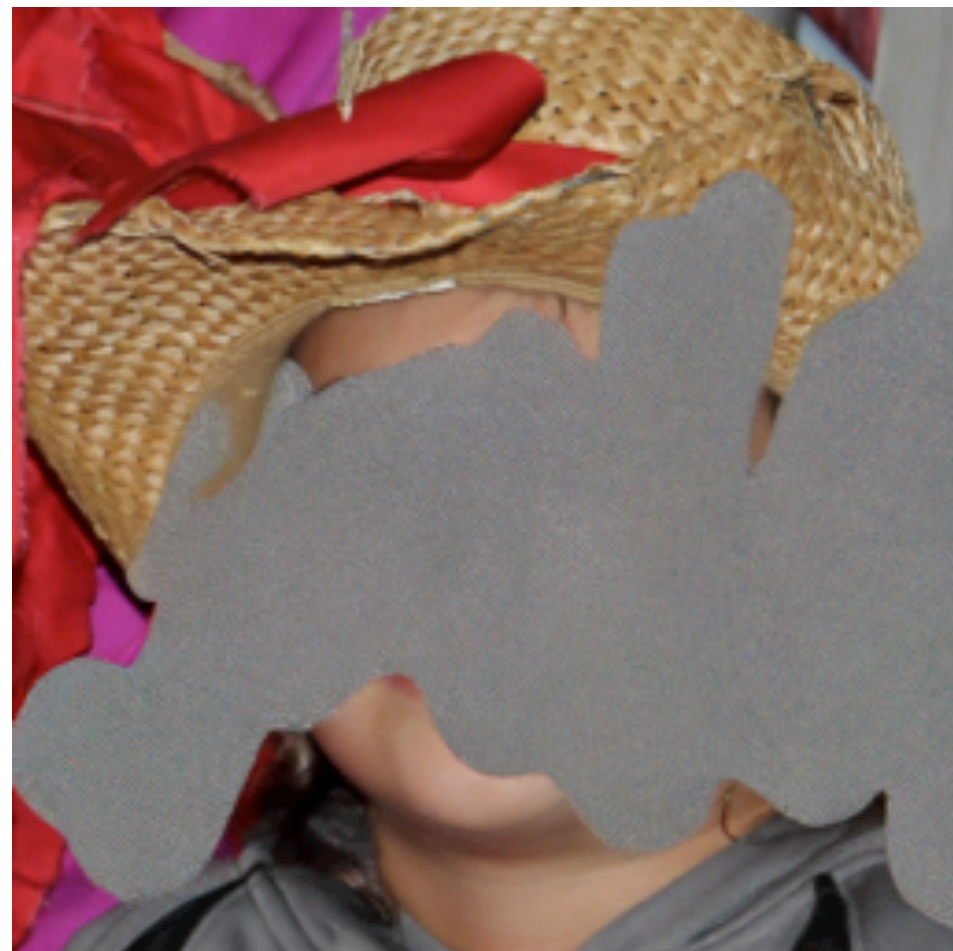

300 Iterations

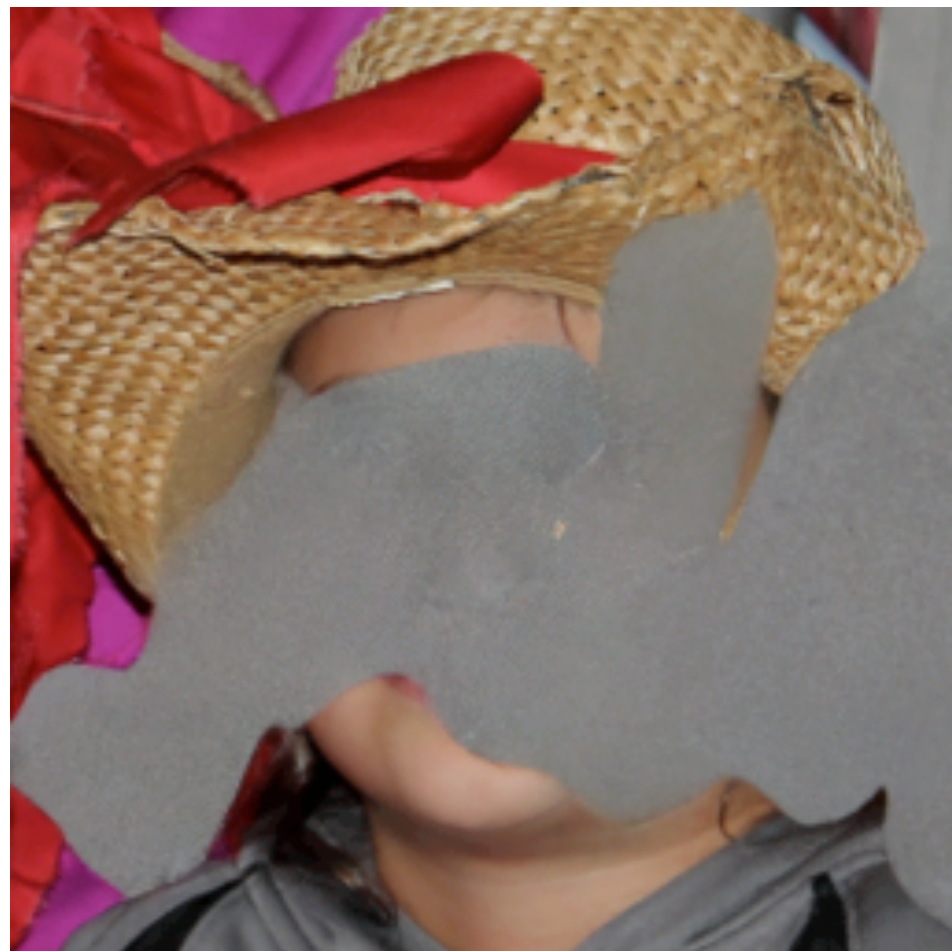

500 Iterations

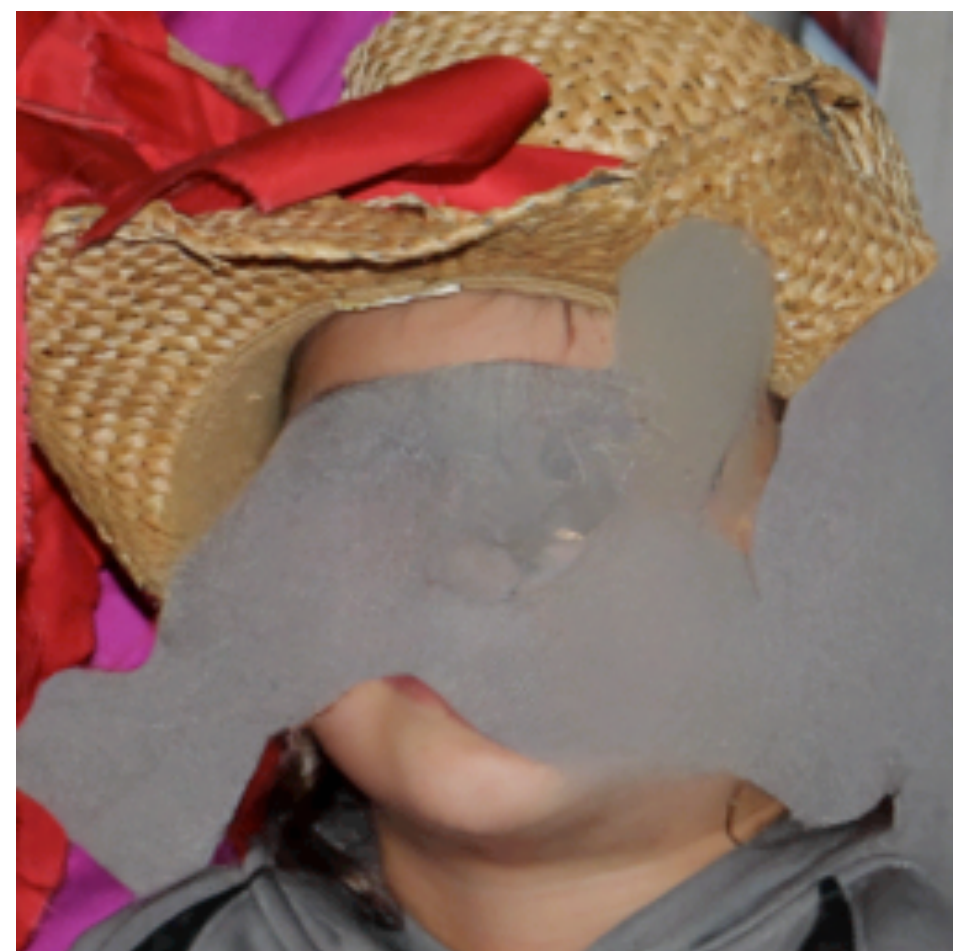

700 Iterations

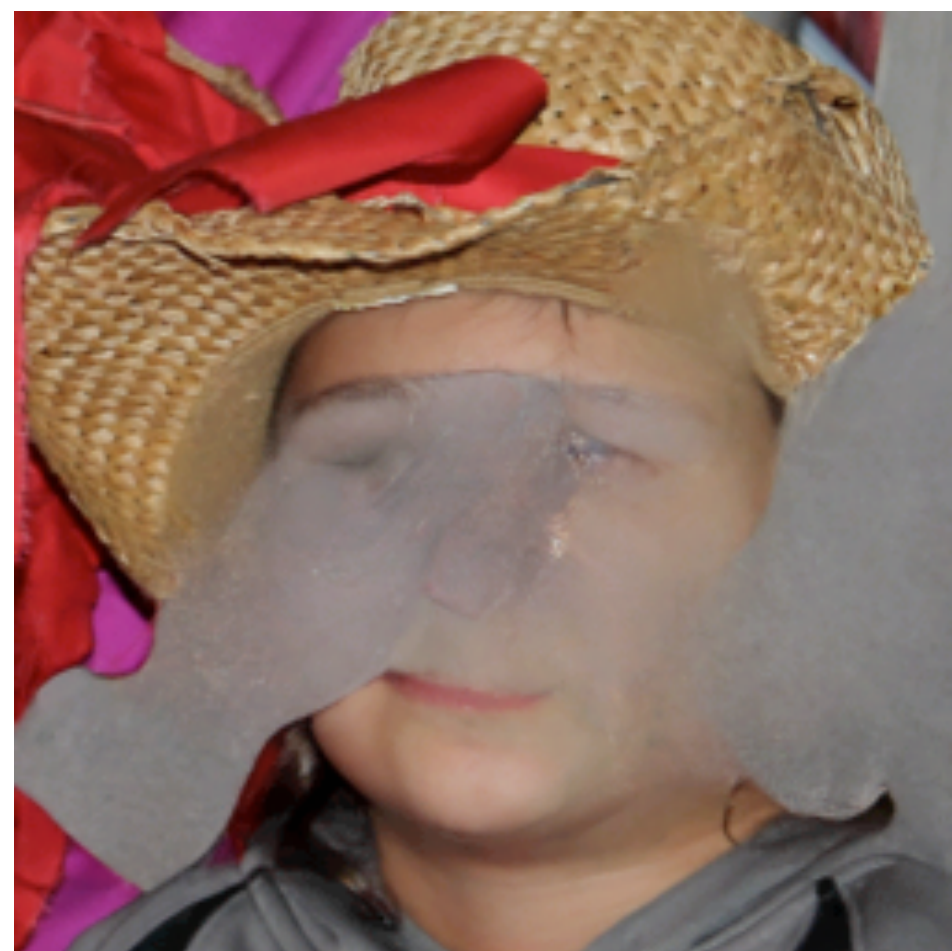

100 Iterations

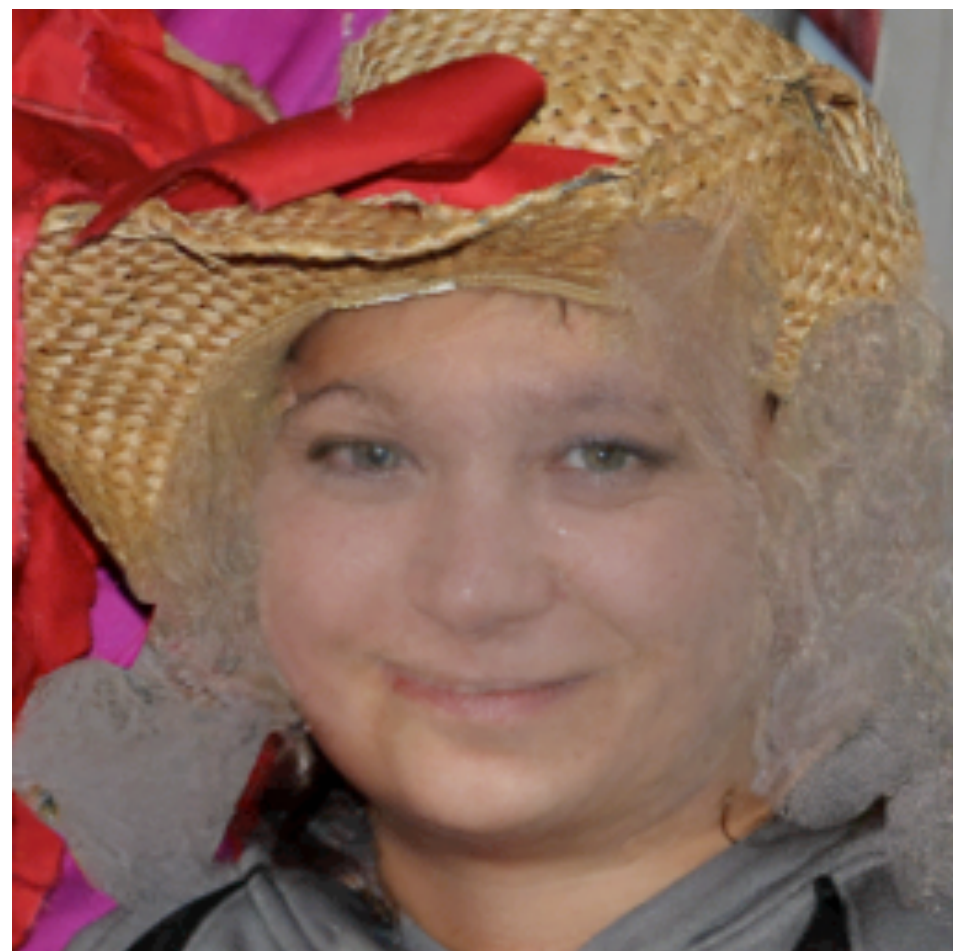

300 Iterations

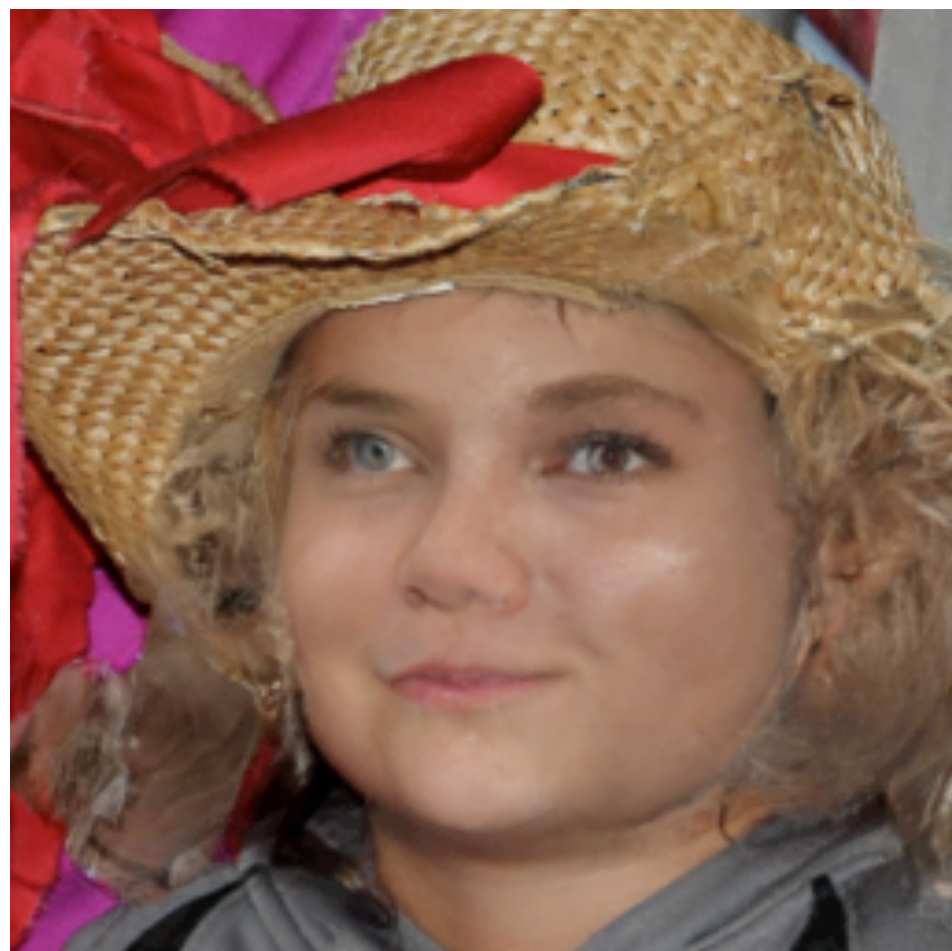

500 Iterations

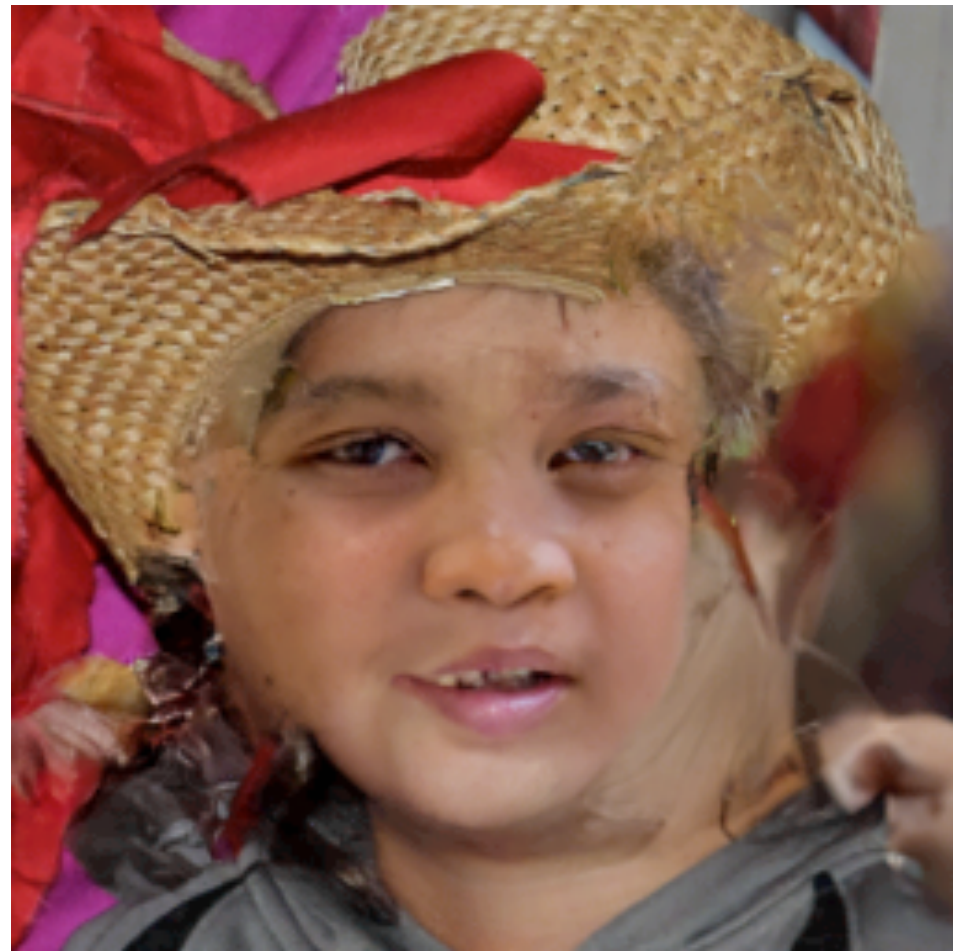

700 Iterations

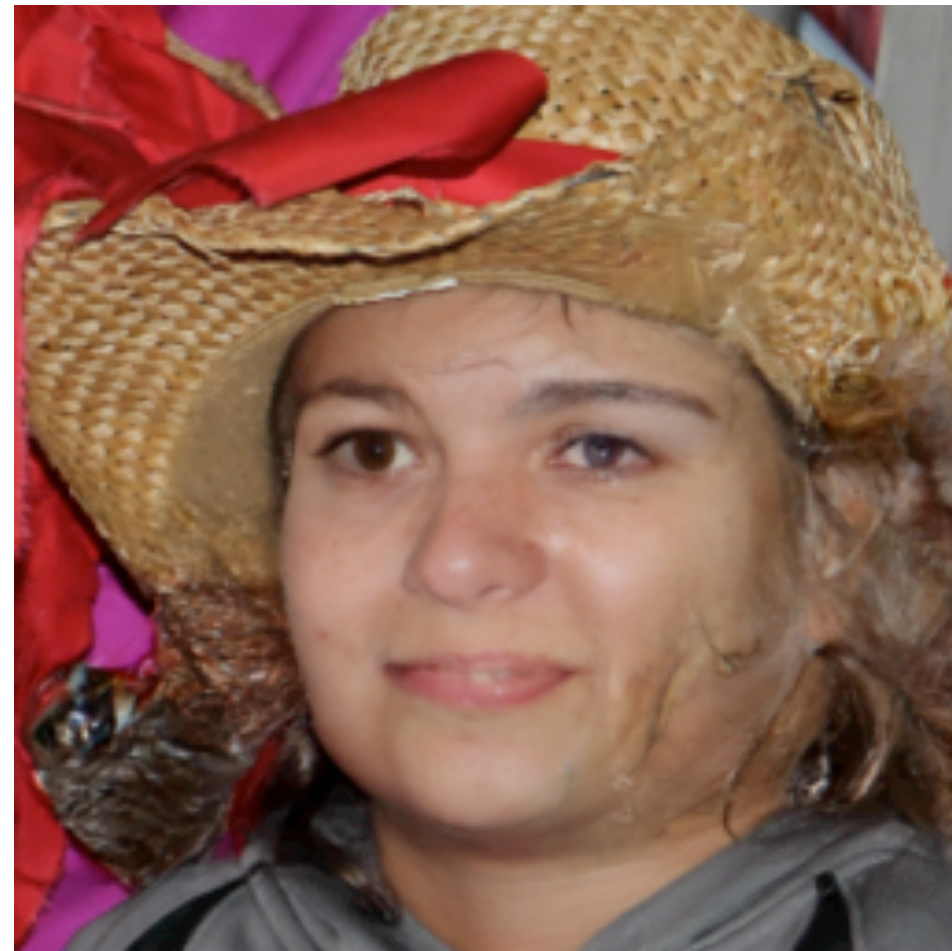

Supplement: supplementary_material [file attachment]
