# Supplementary material
Source: ML conference proceedings conference paper supplement (https://openreview.net/forum?id=xqNCTr9kqg)
Supplement: supplementary_material [file attachment]

|                 |  |  |  |  |  |                 |  |  |  |  |  |                 |  |  |  |  |  |                 |  |  |  |  |  |
|-----------------|--|--|--|--|--|-----------------|--|--|--|--|--|-----------------|--|--|--|--|--|-----------------|--|--|--|--|--|
| Original:       |  |  |  |  |  |
| Mix. QAVI       |  |  |  |  |  | Mix. QAVI       |  |  |  |  |  | Mix. QAVI       |  |  |  |  |  | Mix. QAVI       |  |  |  |  |  |
| Flow QAVI       |  |  |  |  |  | Flow QAVI       |  |  |  |  |  | Flow QAVI       |  |  |  |  |  | Flow QAVI       |  |  |  |  |  |
| Gauss. QAVI     |  |  |  |  |  | Gauss. QAVI     |  |  |  |  |  | Gauss. QAVI     |  |  |  |  |  | Gauss. QAVI     |  |  |  |  |  |
| Posterior Match |  |  |  |  |  | Posterior Match |  |  |  |  |  | Posterior Match |  |  |  |  |  | Posterior Match |  |  |  |  |  |
| Original:       |  |  |  |  |  | Original:       |  |  |  |  |  | Original:       |  |  |  |  |  | Original:       |  |  |  |  |  |
| Mix. QAVI       |  |  |  |  |  | Mix. QAVI       |  |  |  |  |  | Mix. QAVI       |  |  |  |  |  | Mix. QAVI       |  |  |  |  |  |
| Flow QAVI       |  |  |  |  |  | Flow QAVI       |  |  |  |  |  | Flow QAVI       |  |  |  |  |  | Flow QAVI       |  |  |  |  |  |
| Gauss. QAVI     |  |  |  |  |  | Gauss. QAVI     |  |  |  |  |  | Gauss. QAVI     |  |  |  |  |  | Gauss. QAVI     |  |  |  |  |  |
| Posterior Match |  |  |  |  |  | Posterior Match |  |  |  |  |  | Posterior Match |  |  |  |  |  | Posterior Match |  |  |  |  |  |
| Original:       |  |  |  |  |  | Original:       |  |  |  |  |  | Original:       |  |  |  |  |  | Original:       |  |  |  |  |  |
| Mix. QAVI       |  |  |  |  |  | Mix. QAVI       |  |  |  |  |  | Mix. QAVI       |  |  |  |  |  | Mix. QAVI       |  |  |  |  |  |
| Flow QAVI       |  |  |  |  |  | Flow QAVI       |  |  |  |  |  | Flow QAVI       |  |  |  |  |  | Flow QAVI       |  |  |  |  |  |
| Gauss. QAVI     |  |  |  |  |  | Gauss. QAVI     |  |  |  |  |  | Gauss. QAVI     |  |  |  |  |  | Gauss. QAVI     |  |  |  |  |  |
| Posterior Match |  |  |  |  |  | Posterior Match |  |  |  |  |  | Posterior Match |  |  |  |  |  | Posterior Match |  |  |  |  |  |
| Original:       |  |  |  |  |  | Original:       |  |  |  |  |  | Original:       |  |  |  |  |  | Original:       |  |  |  |  |  |
| Mix. QAVI       |  |  |  |  |  | Mix. QAVI       |  |  |  |  |  | Mix. QAVI       |  |  |  |  |  | Mix. QAVI       |  |  |  |  |  |
| Flow QAVI       |  |  |  |  |  | Flow QAVI       |  |  |  |  |  | Flow QAVI       |  |  |  |  |  | Flow QAVI       |  |  |  |  |  |
| Gauss. QAVI     |  |  |  |  |  | Gauss. QAVI     |  |  |  |  |  | Gauss. QAVI     |  |  |  |  |  | Gauss. QAVI     |  |  |  |  |  |
| Posterior Match |  |  |  |  |  | Posterior Match |  |  |  |  |  | Posterior Match |  |  |  |  |  | Posterior Match |  |  |  |  |  |
| Original:       |  |  |  |  |  | Original:       |  |  |  |  |  | Original:       |  |  |  |  |  | Original:       |  |  |  |  |  |
| Mix. QAVI       |  |  |  |  |  | Mix. QAVI       |  |  |  |  |  | Mix. QAVI       |  |  |  |  |  | Mix. QAVI       |  |  |  |  |  |
| Flow QAVI       |  |  |  |  |  | Flow QAVI       |  |  |  |  |  | Flow QAVI       |  |  |  |  |  | Flow QAVI       |  |  |  |  |  |
| Gauss. QAVI     |  |  |  |  |  | Gauss. QAVI     |  |  |  |  |  | Gauss. QAVI     |  |  |  |  |  | Gauss. QAVI     |  |  |  |  |  |
| Posterior Match |  |  |  |  |  | Posterior Match |  |  |  |  |  | Posterior Match |  |  |  |  |  | Posterior Match |  |  |  |  |  |
