# Supplementary material
Source: ML conference proceedings conference paper supplement (https://openreview.net/forum?id=xqNCTr9kqg)
Supplement: supplementary_material [file attachment]

Generative  
Model :

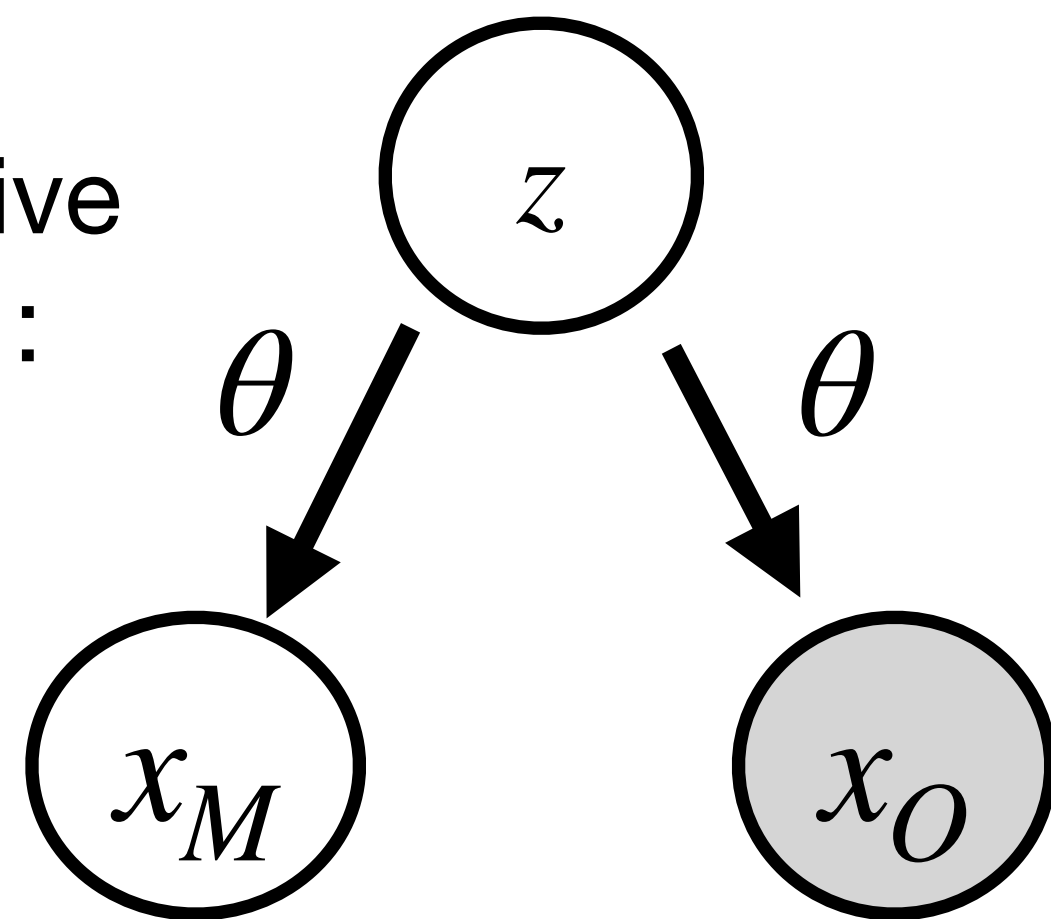

Inference  
Model :

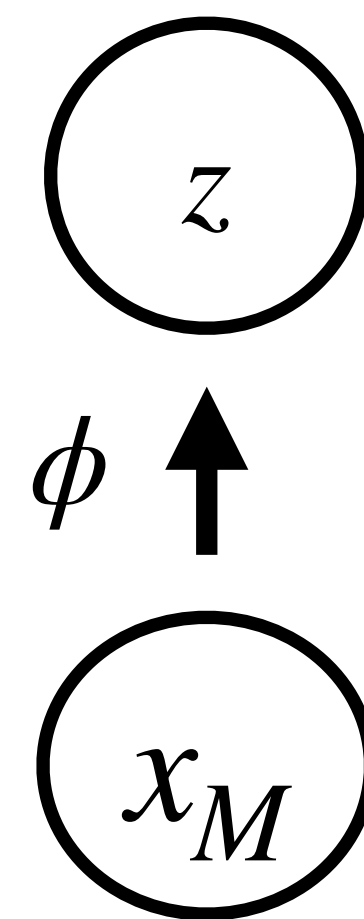

(a)  $q_\lambda(x_M) q_\phi(z | x_M)$

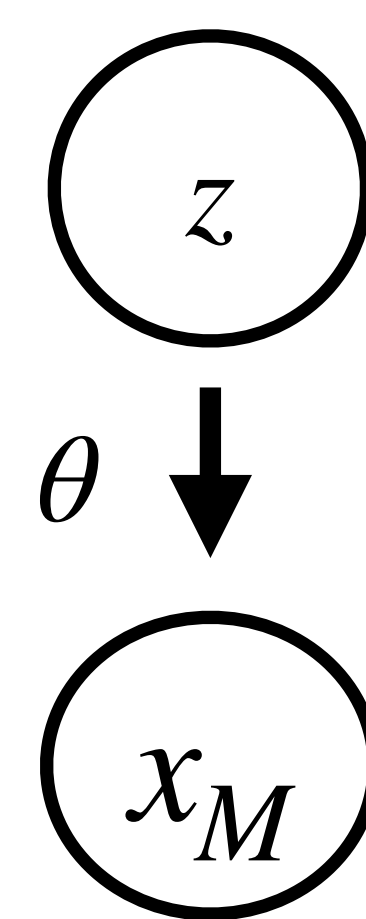

(b)  $q_\lambda(z) p_\theta(x_M | z)$

$x_M \sim q_\lambda(x_M)$

$z \sim q_\phi(z | x_O, x_M)$

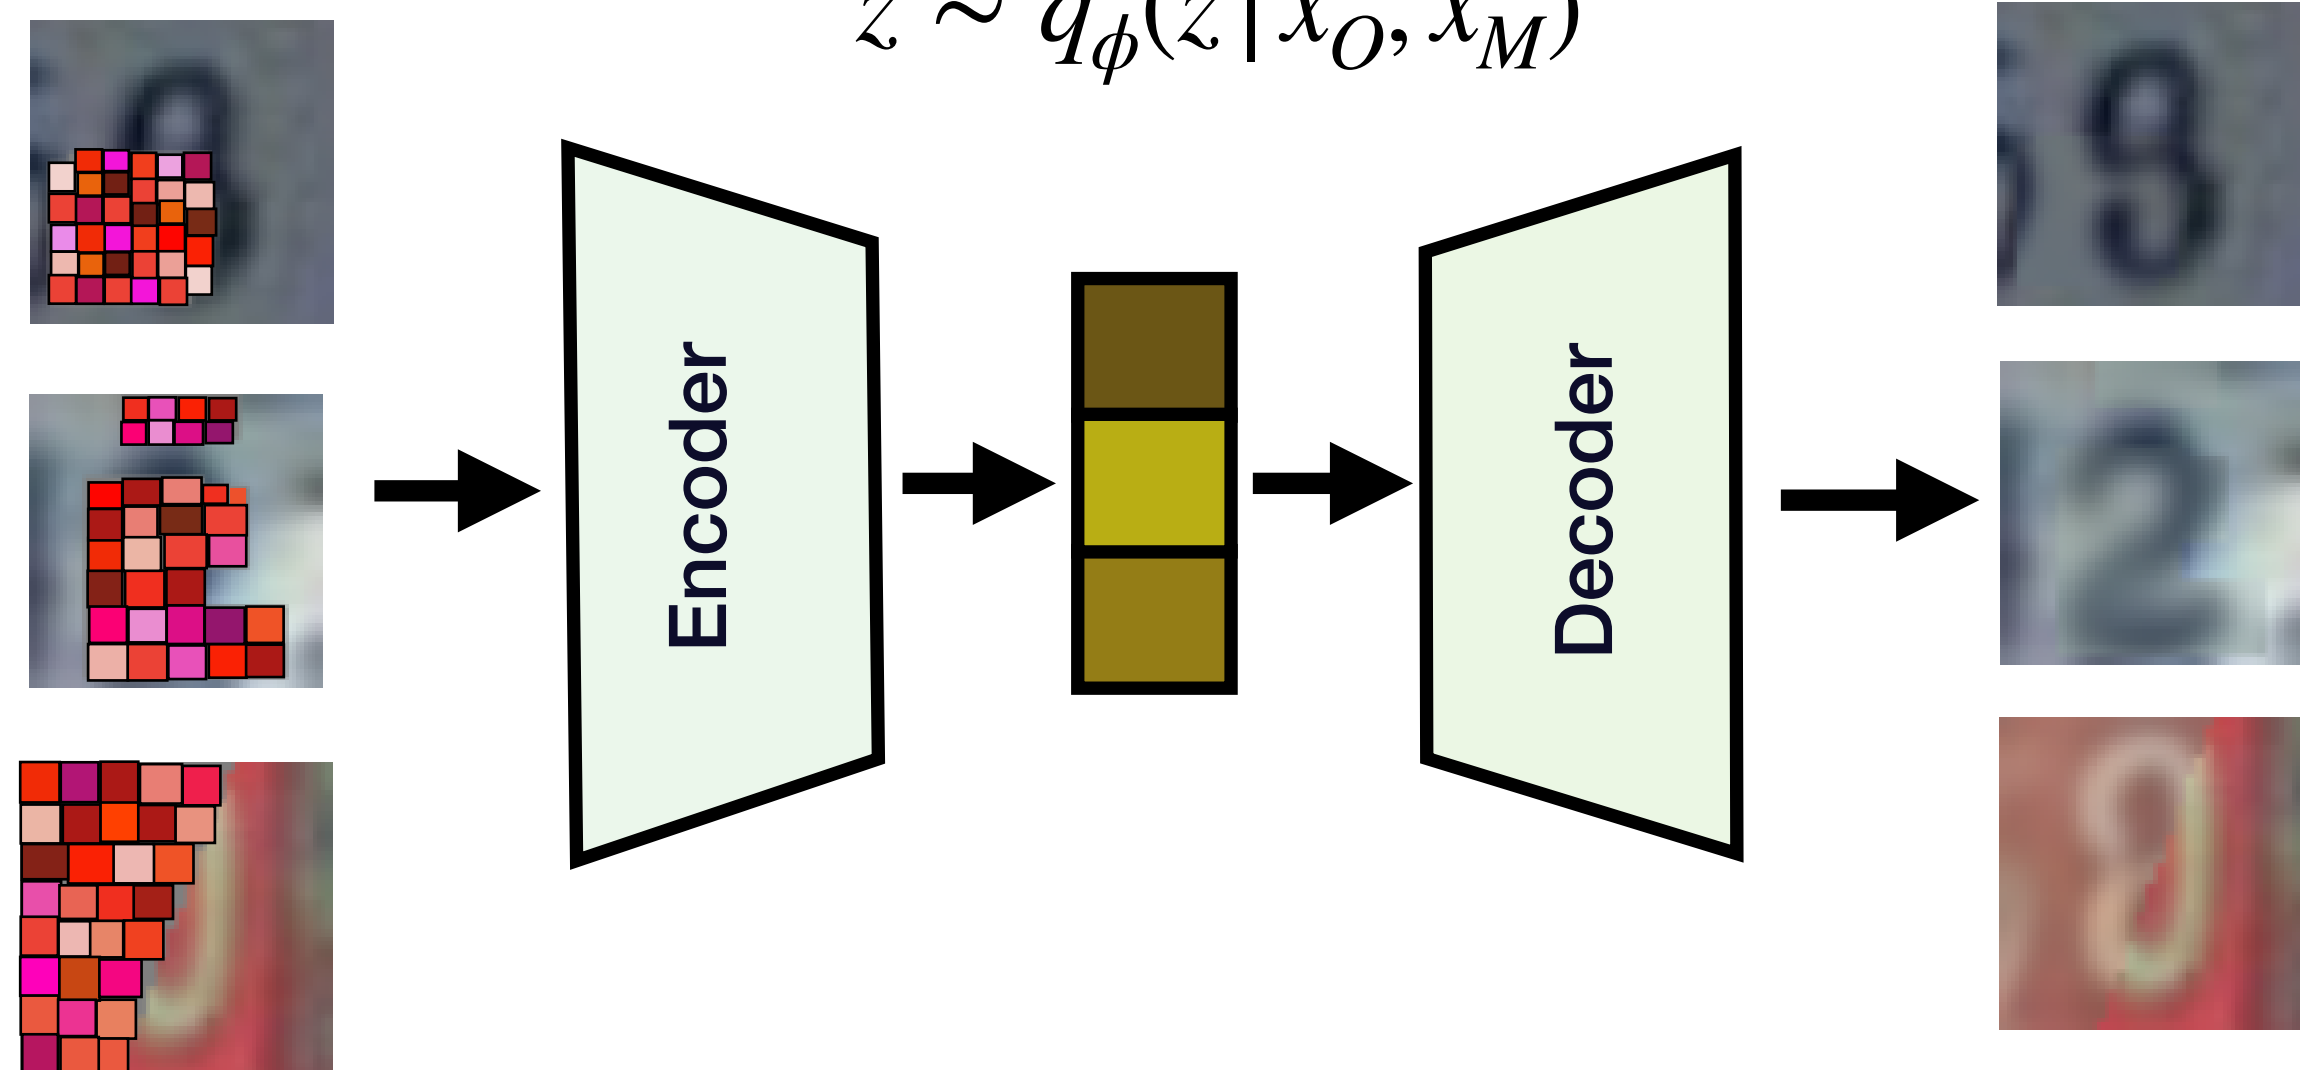

(a)

$z \sim q_\lambda(z)$

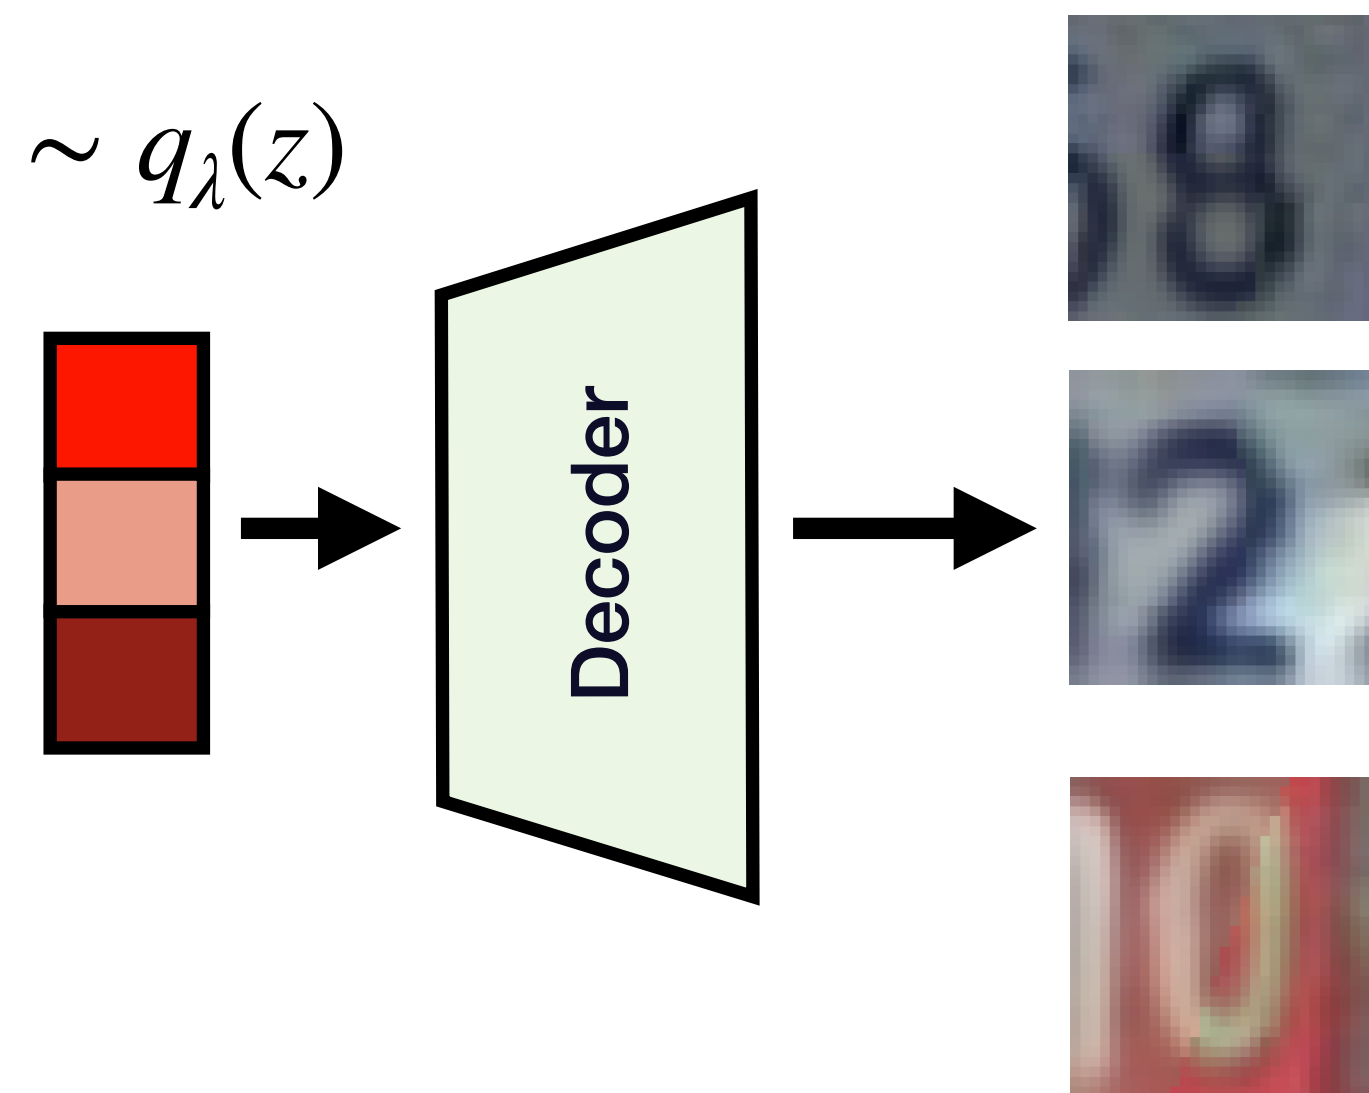

(b)
