# Supplementary material
Source: ML conference proceedings conference paper supplement (https://openreview.net/forum?id=xqNCTr9kqg)

Truth

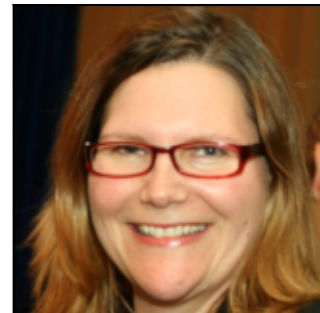

Unamortized

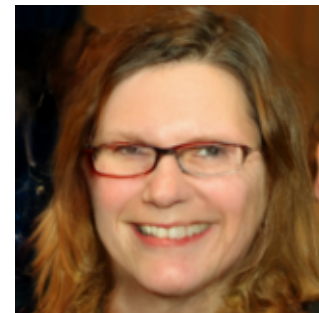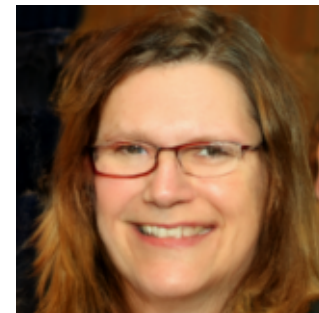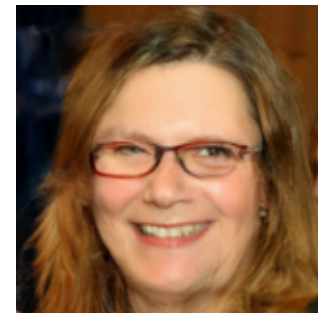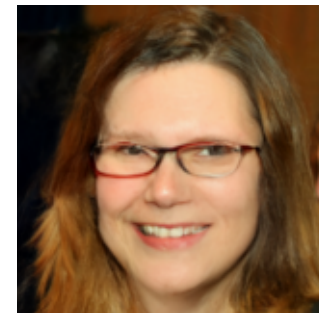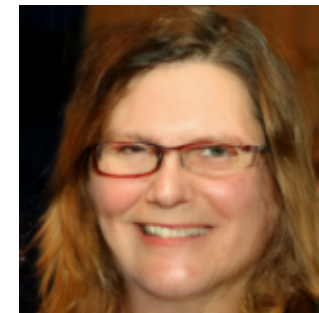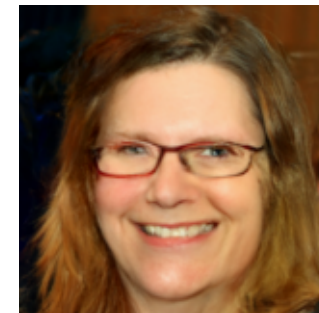

Masked

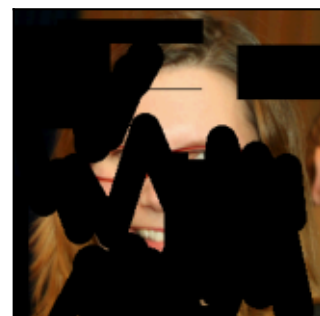

Posterior-Matching

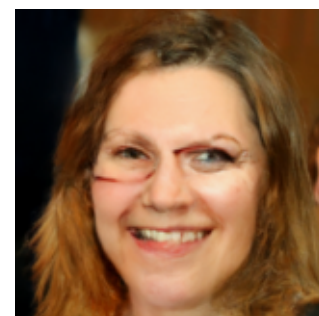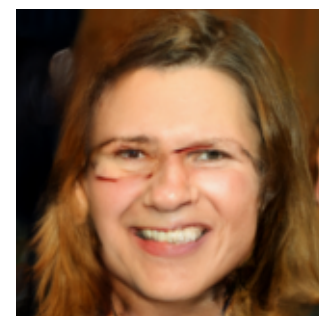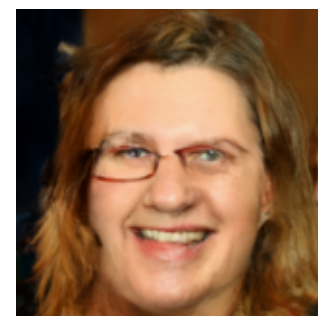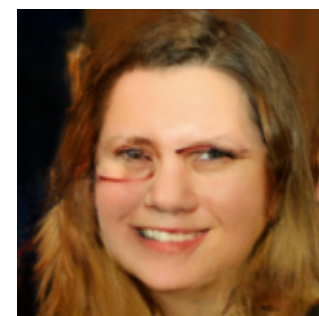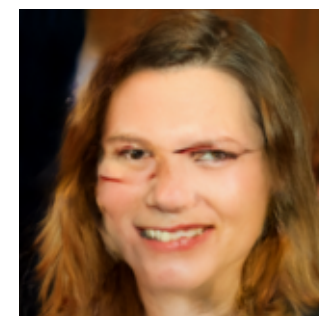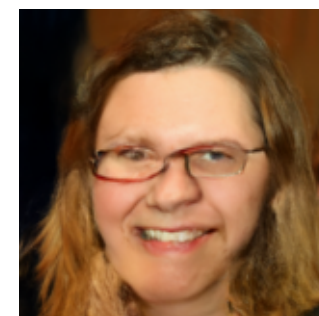

Mask

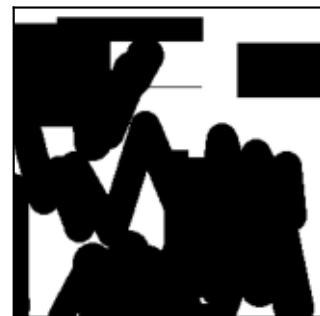

IPA

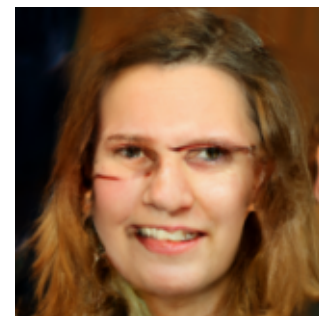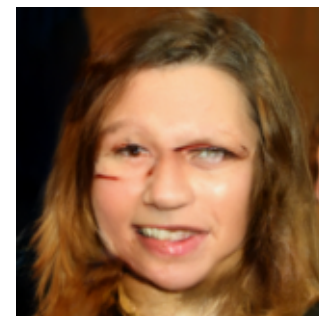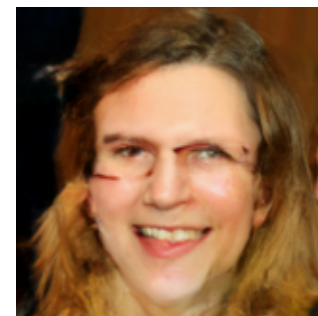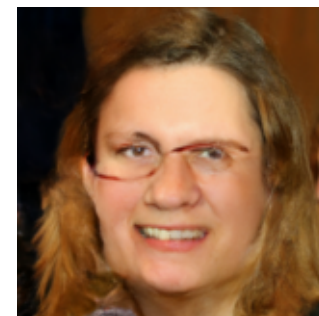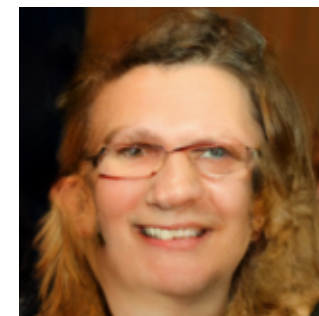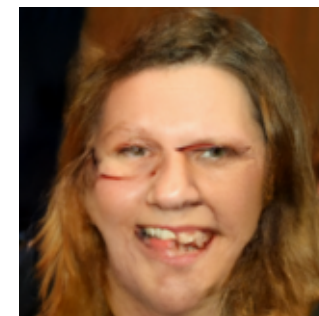

Inception distances (from truth)

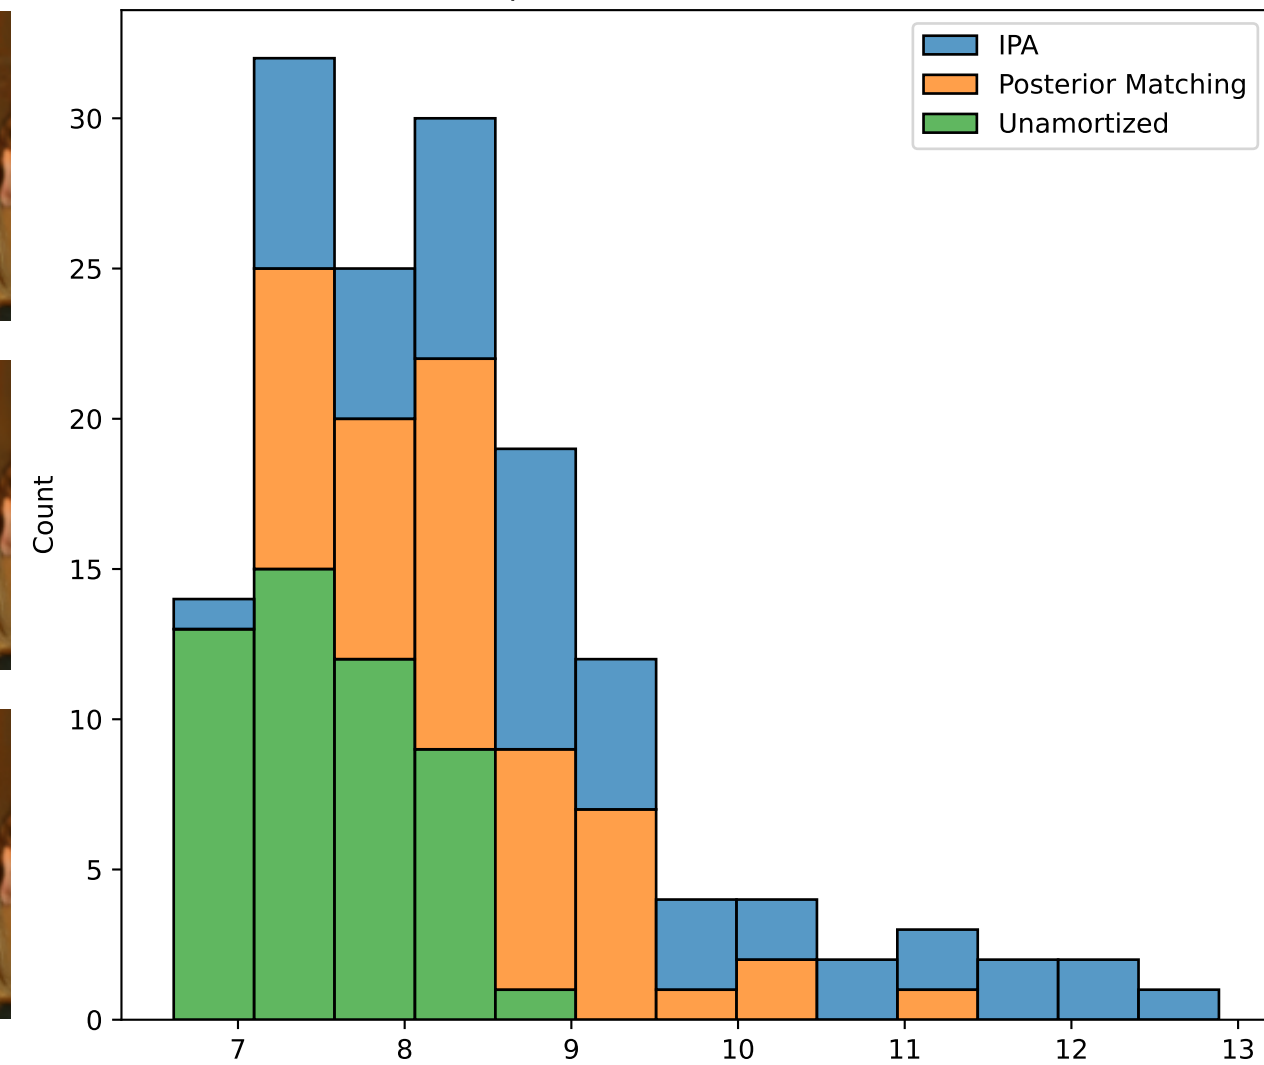

Supplement: supplementary_material [file attachment]

Truth

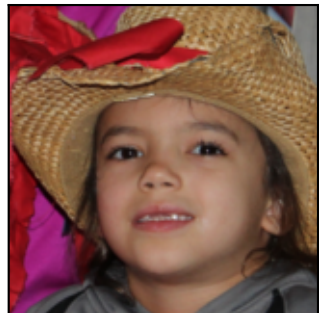

Masked

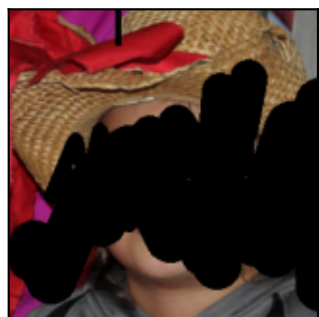

Mask

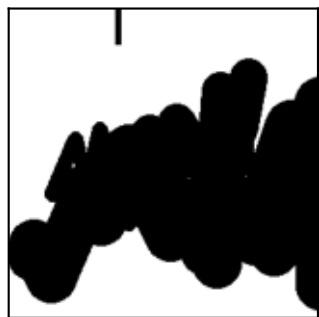

Unamortized

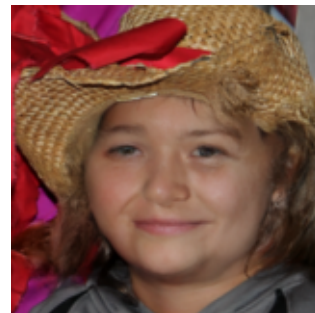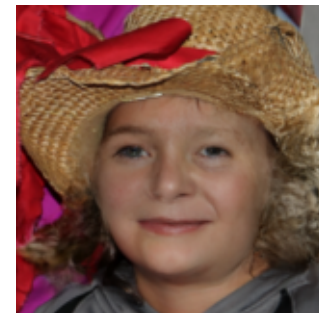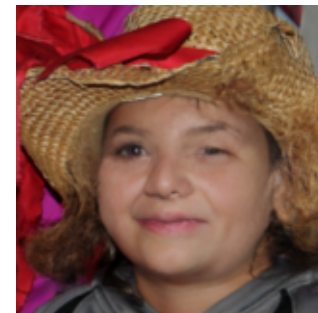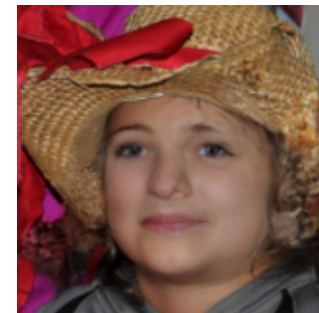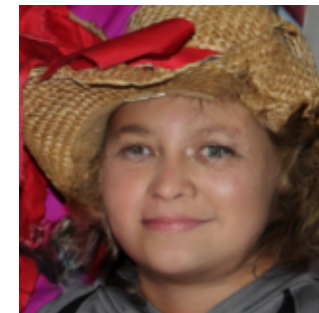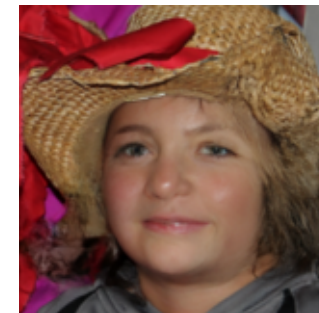

Posterior-Matching

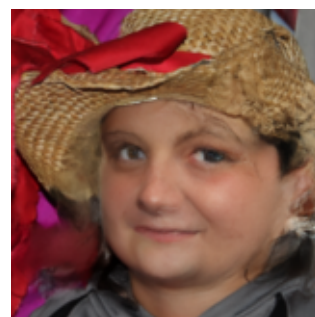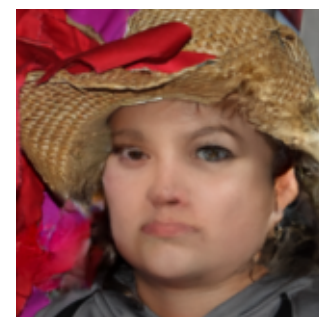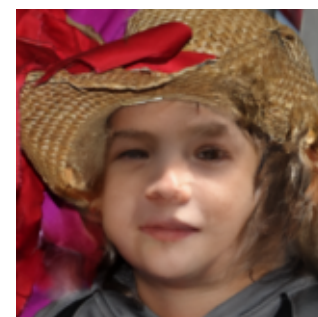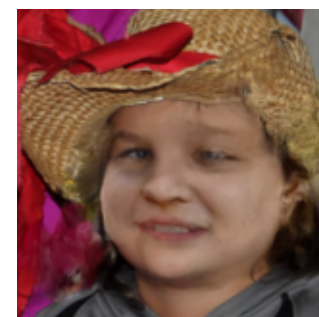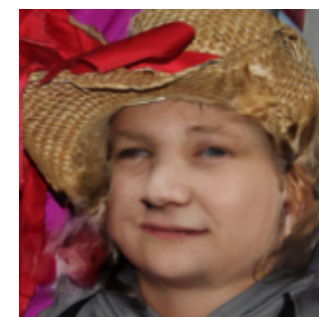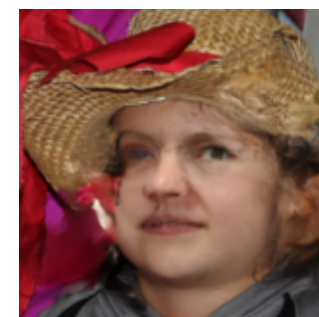

IPA

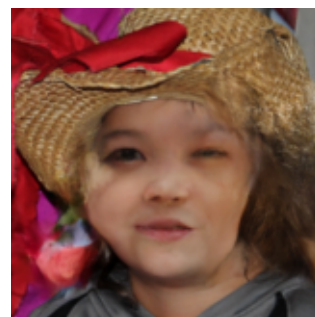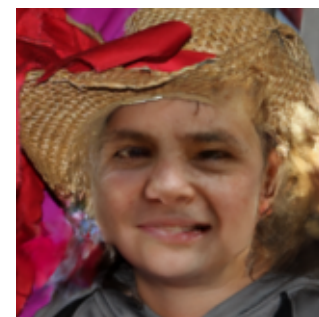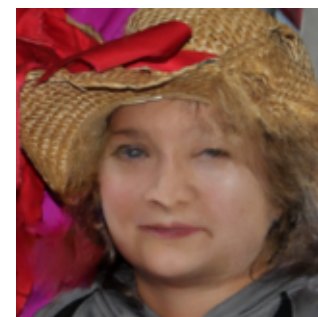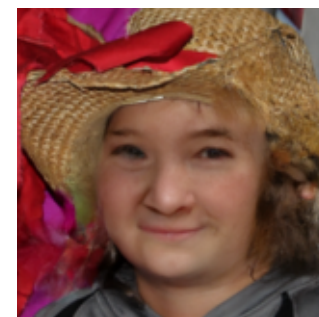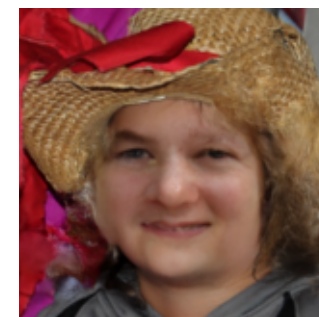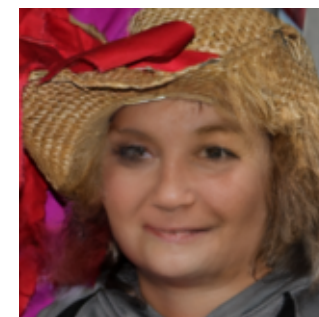

Inception distances (from truth)

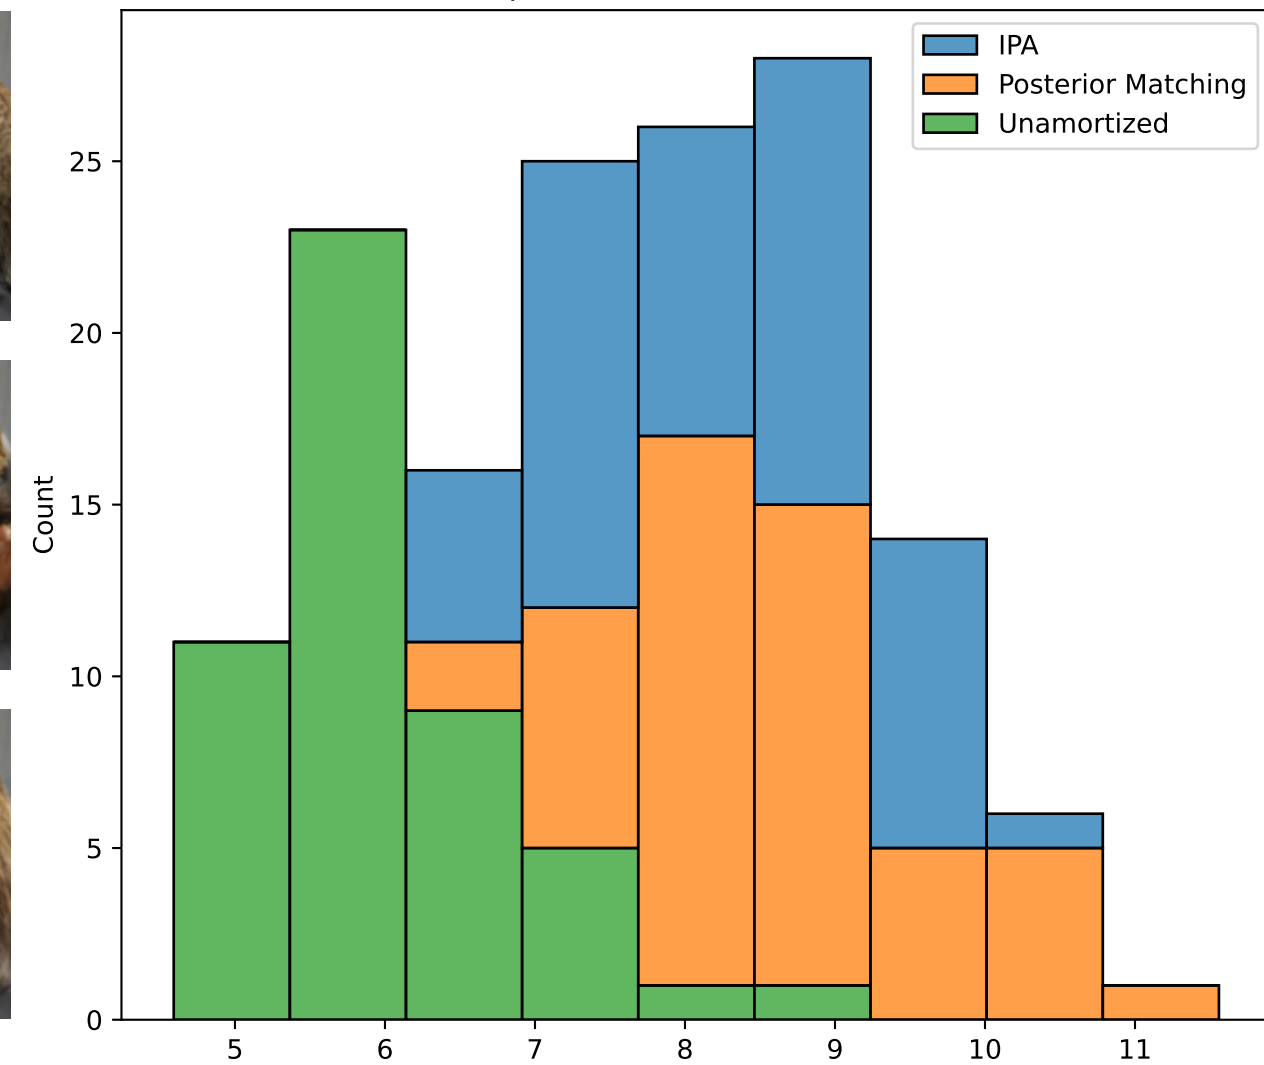

Supplement: supplementary_material [file attachment]

## Pre-trained Encoder

## Local Parameters

## Pre-trained Decoder

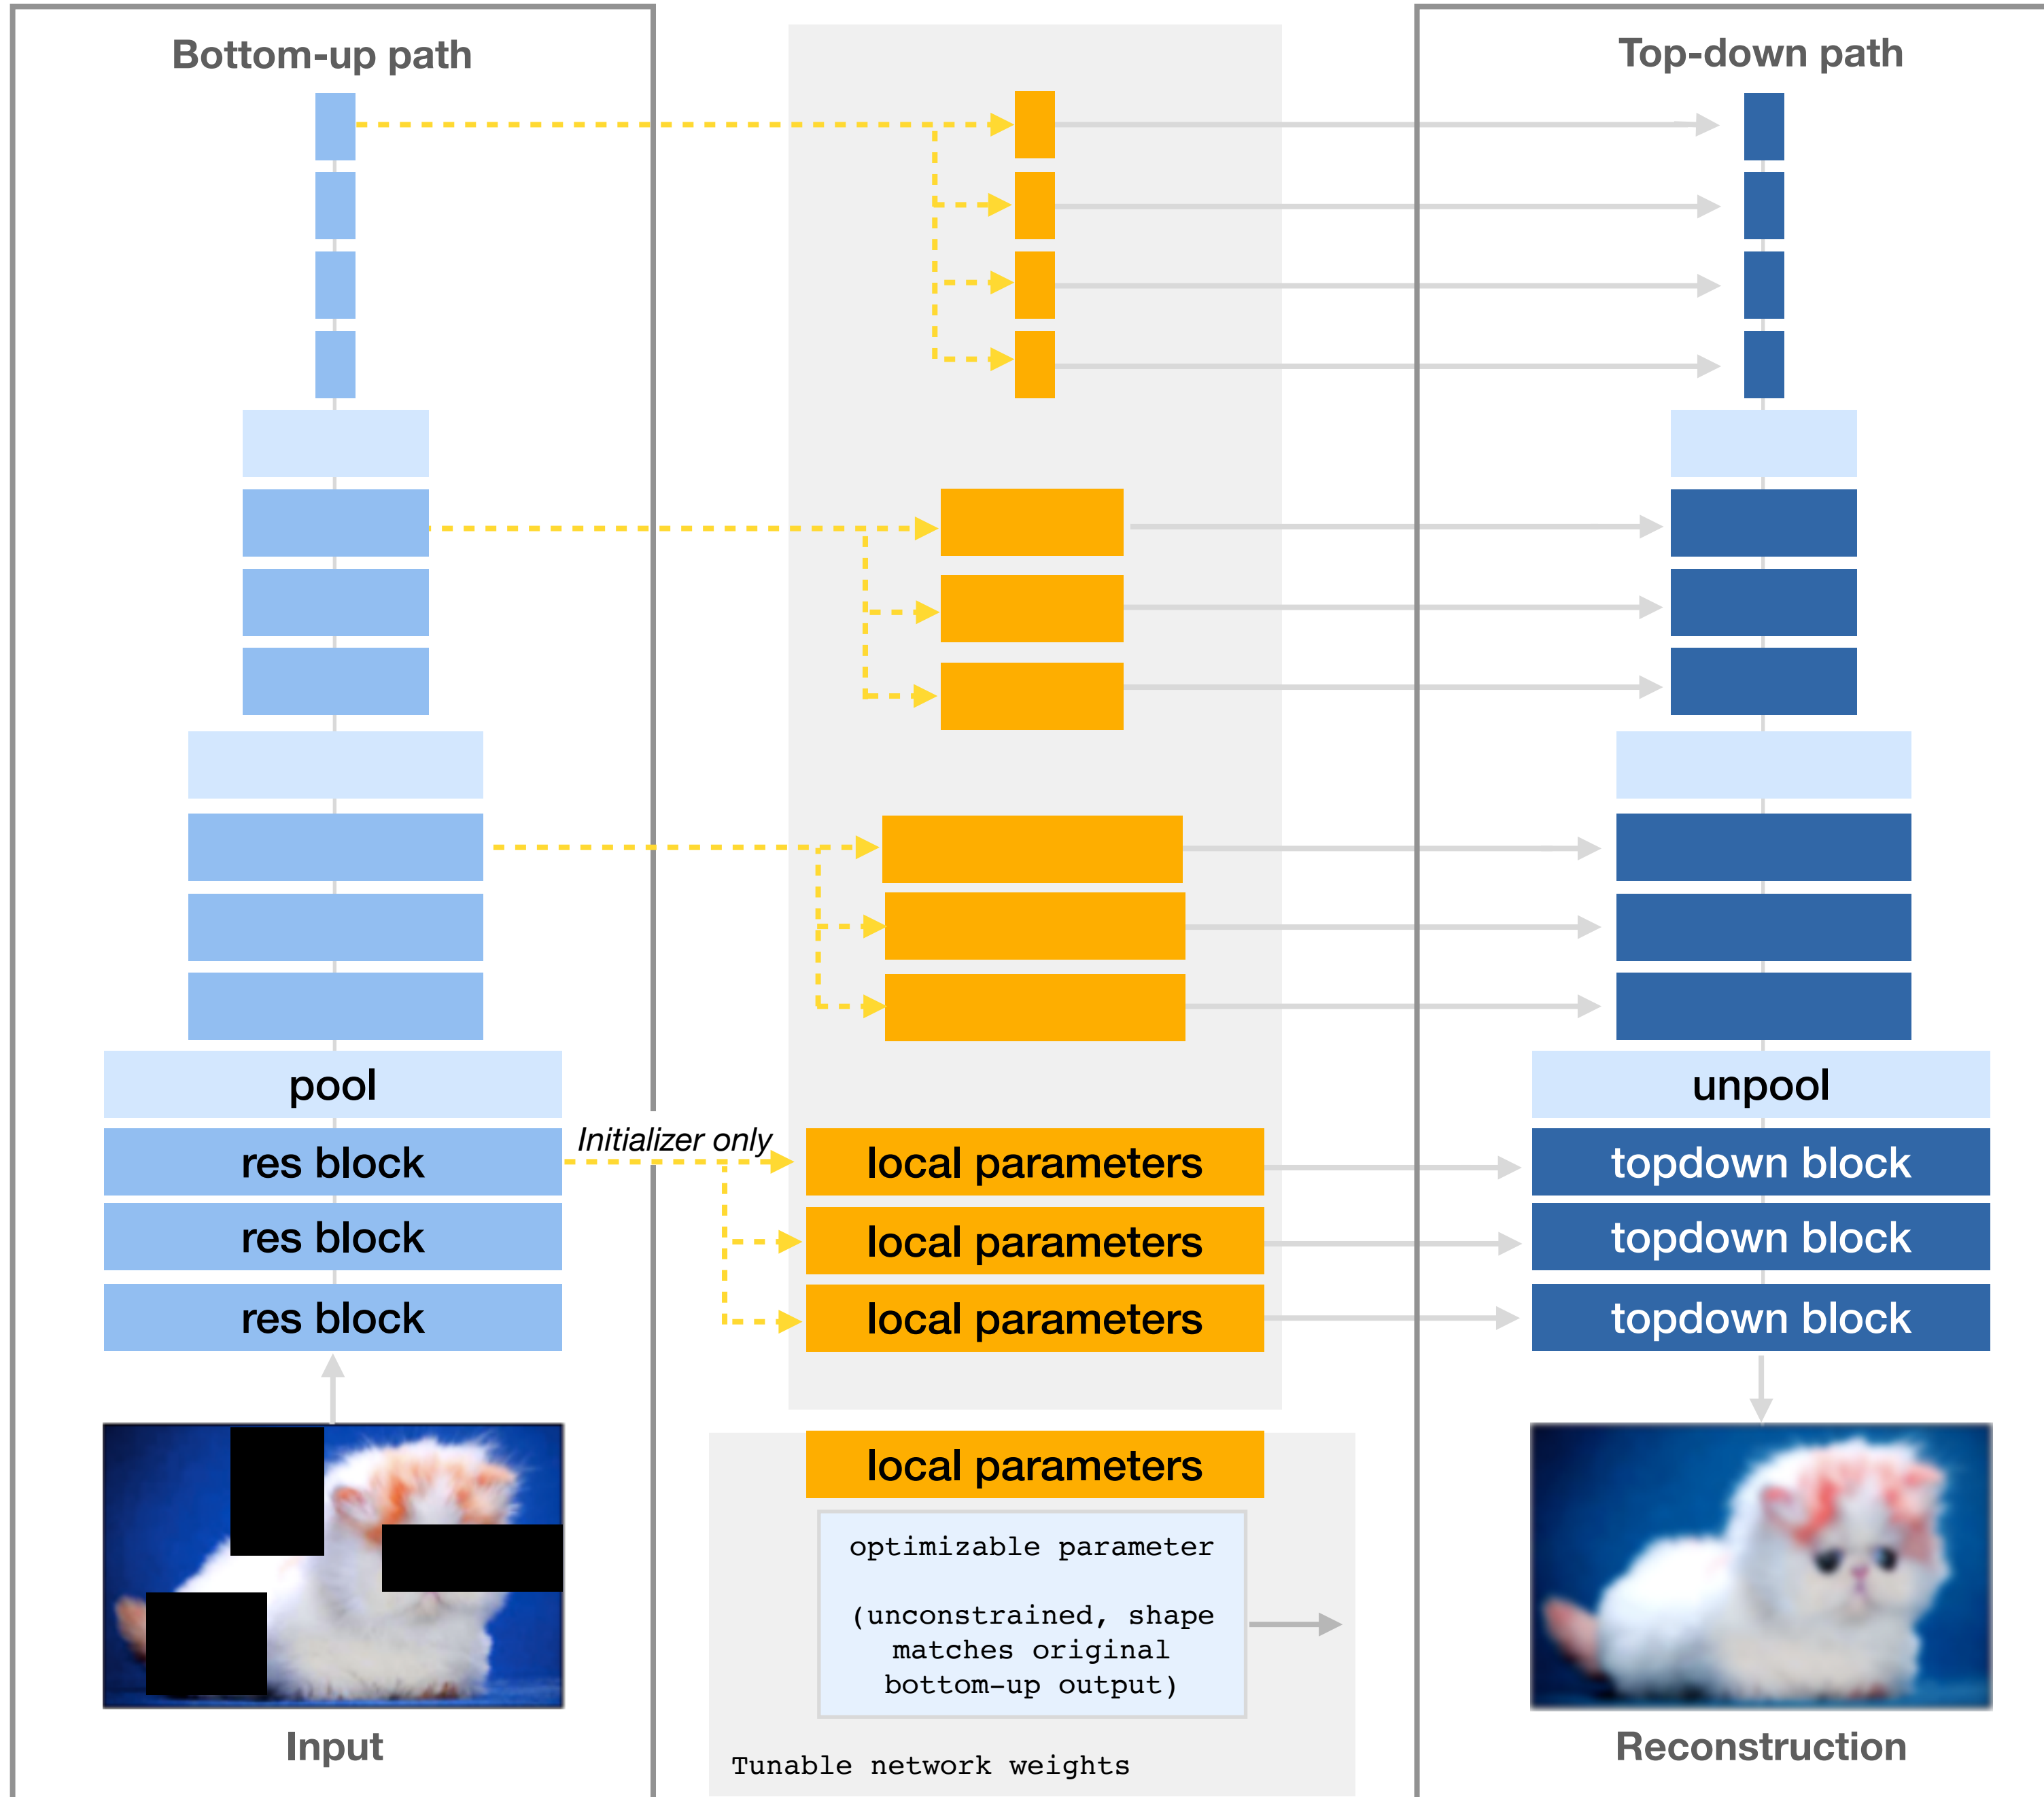

## res block

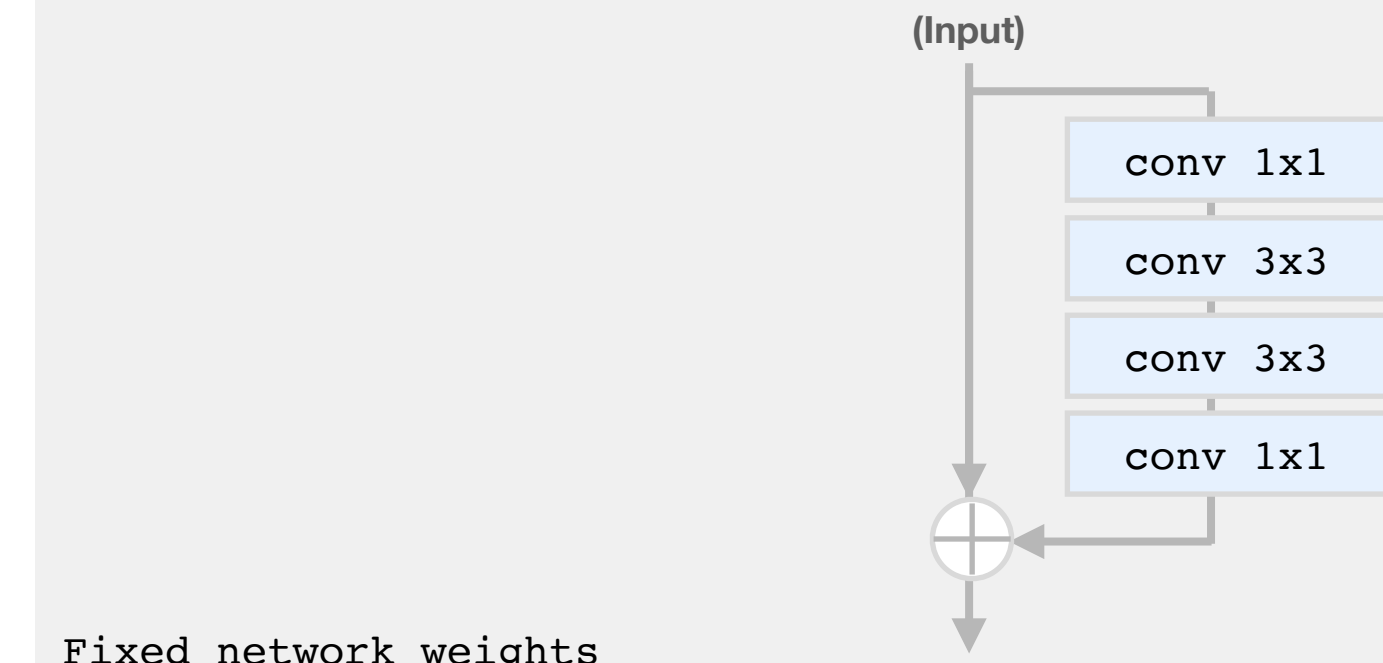

topdown block

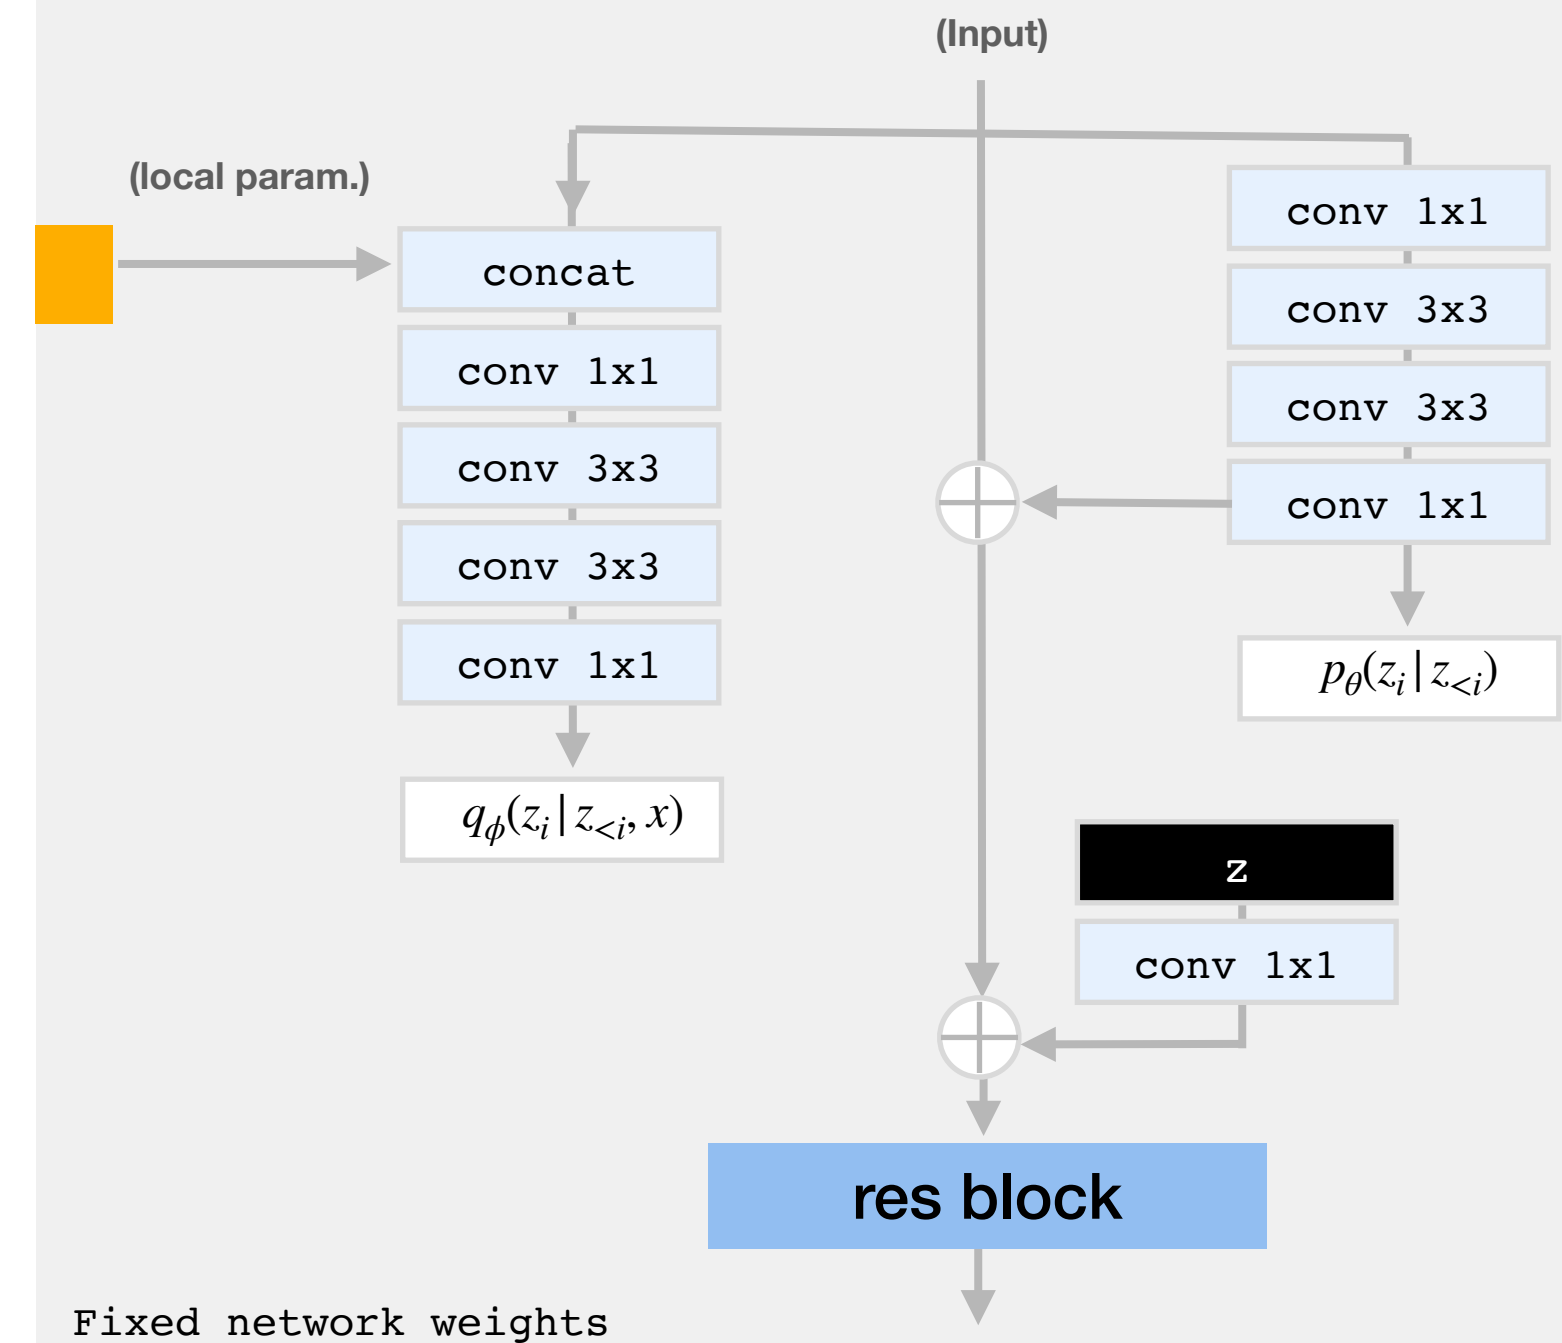

Supplement: supplementary_material [file attachment]

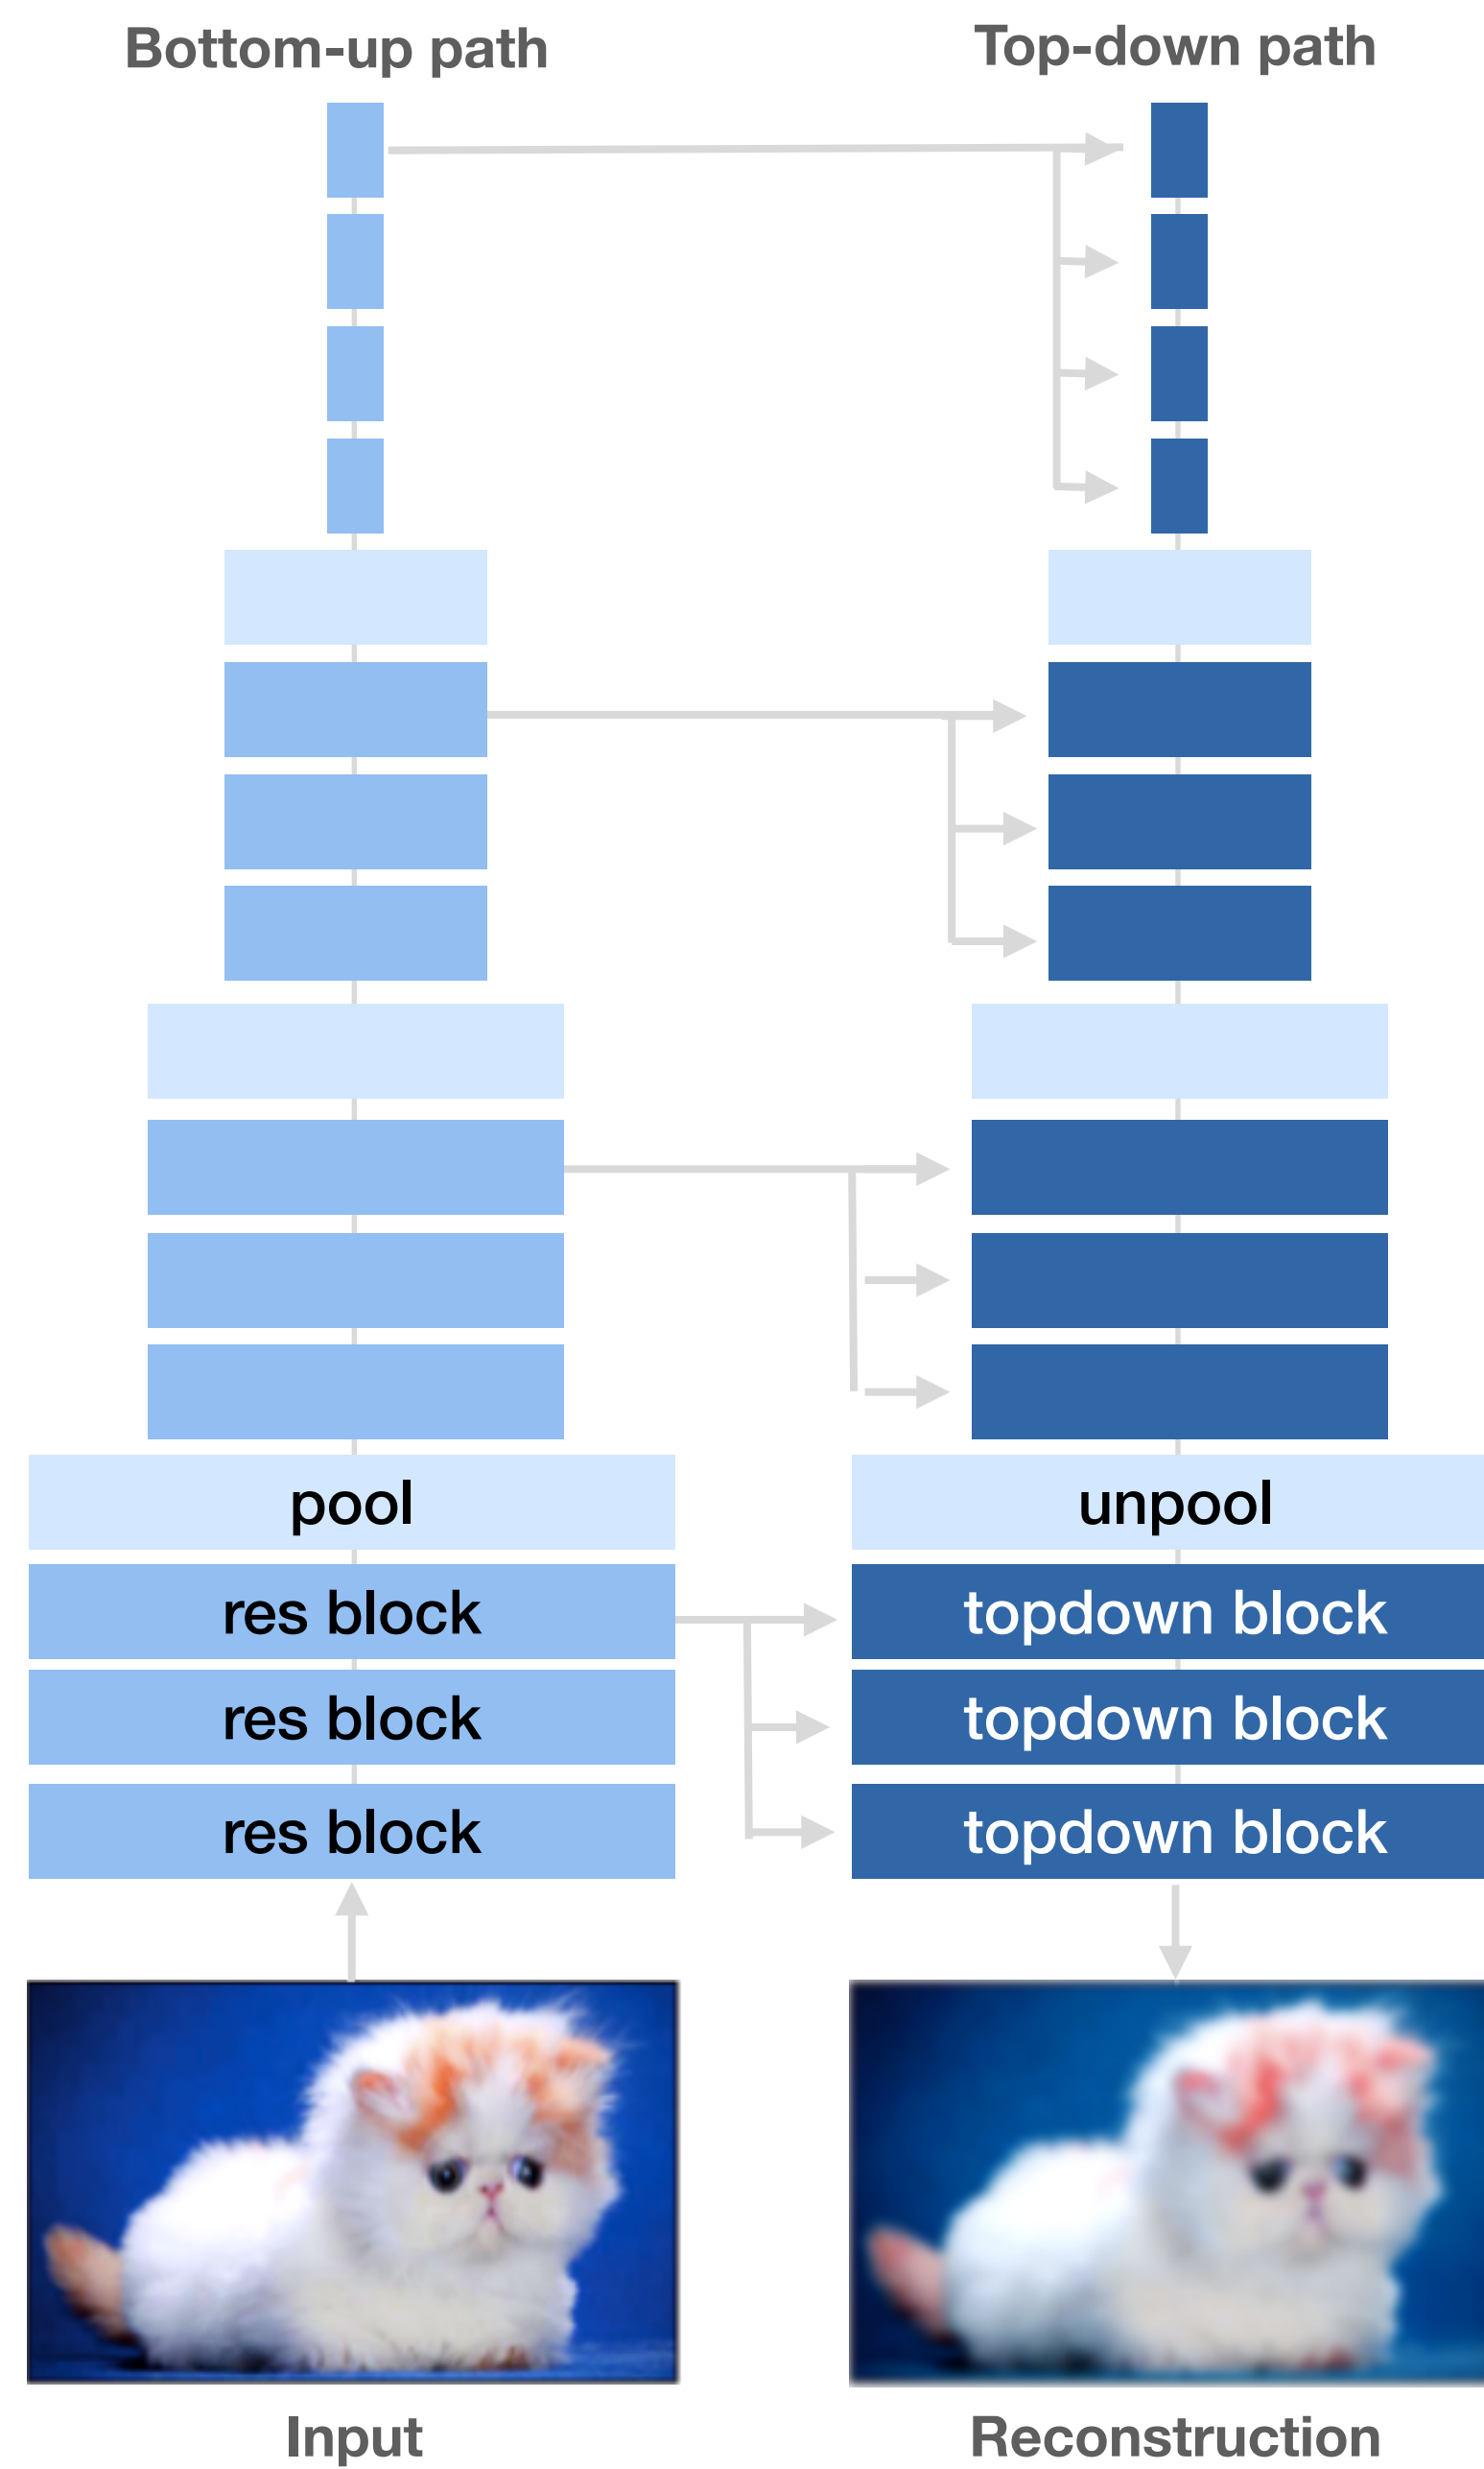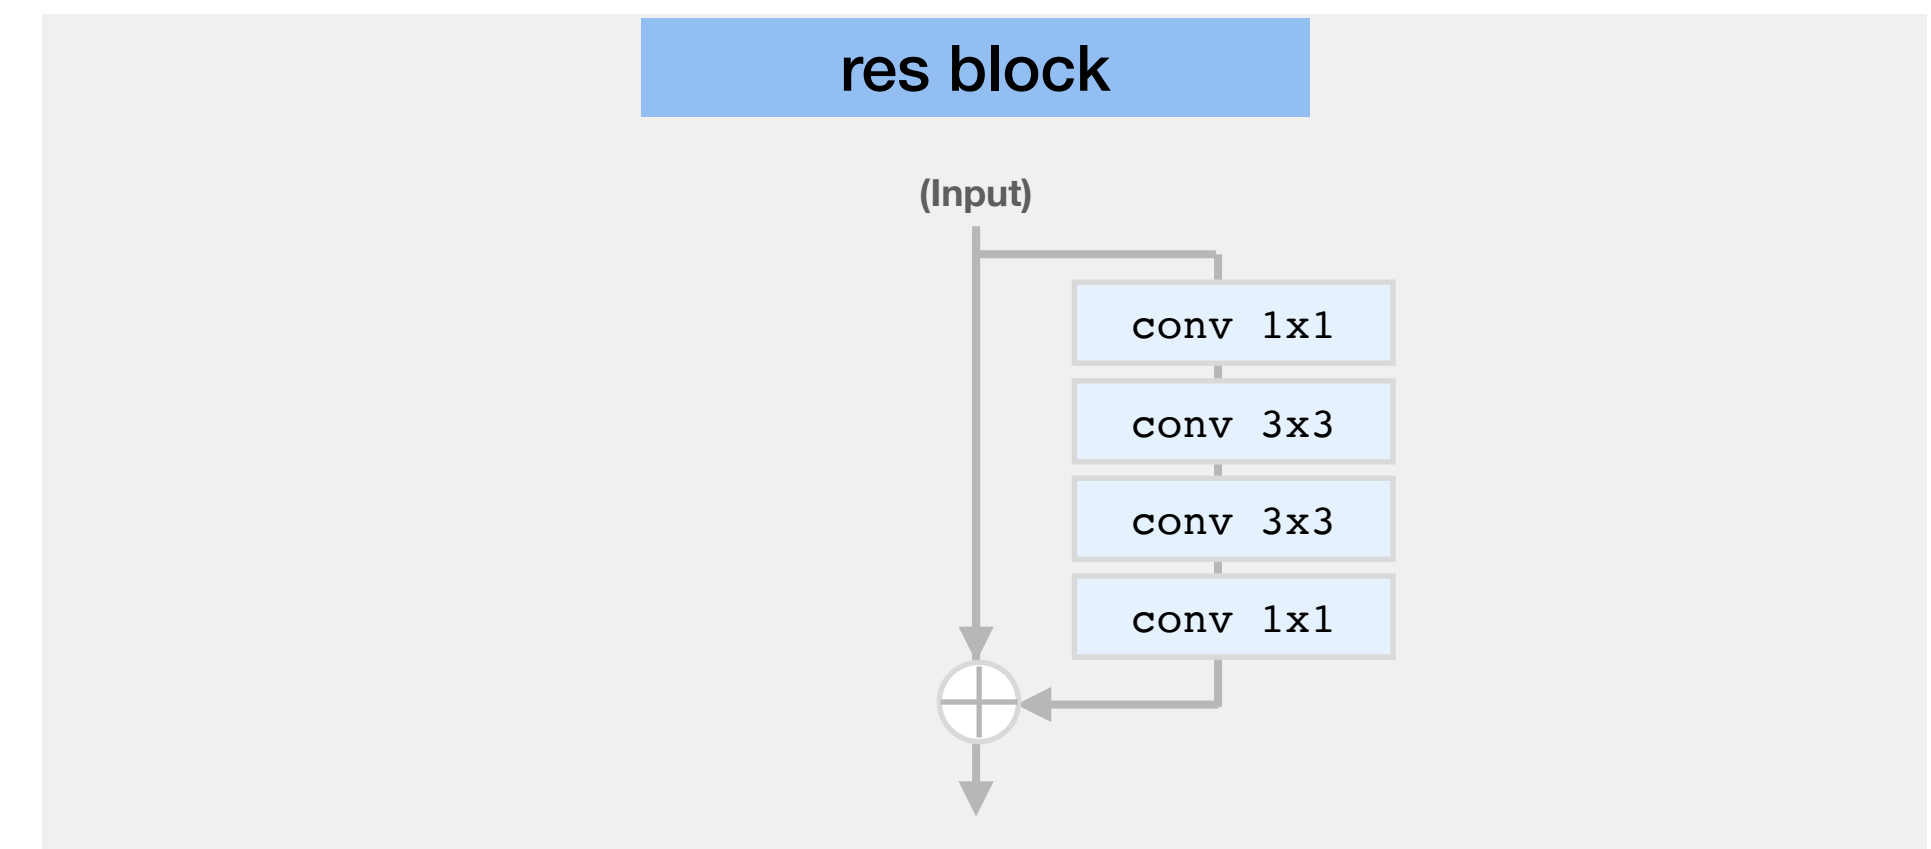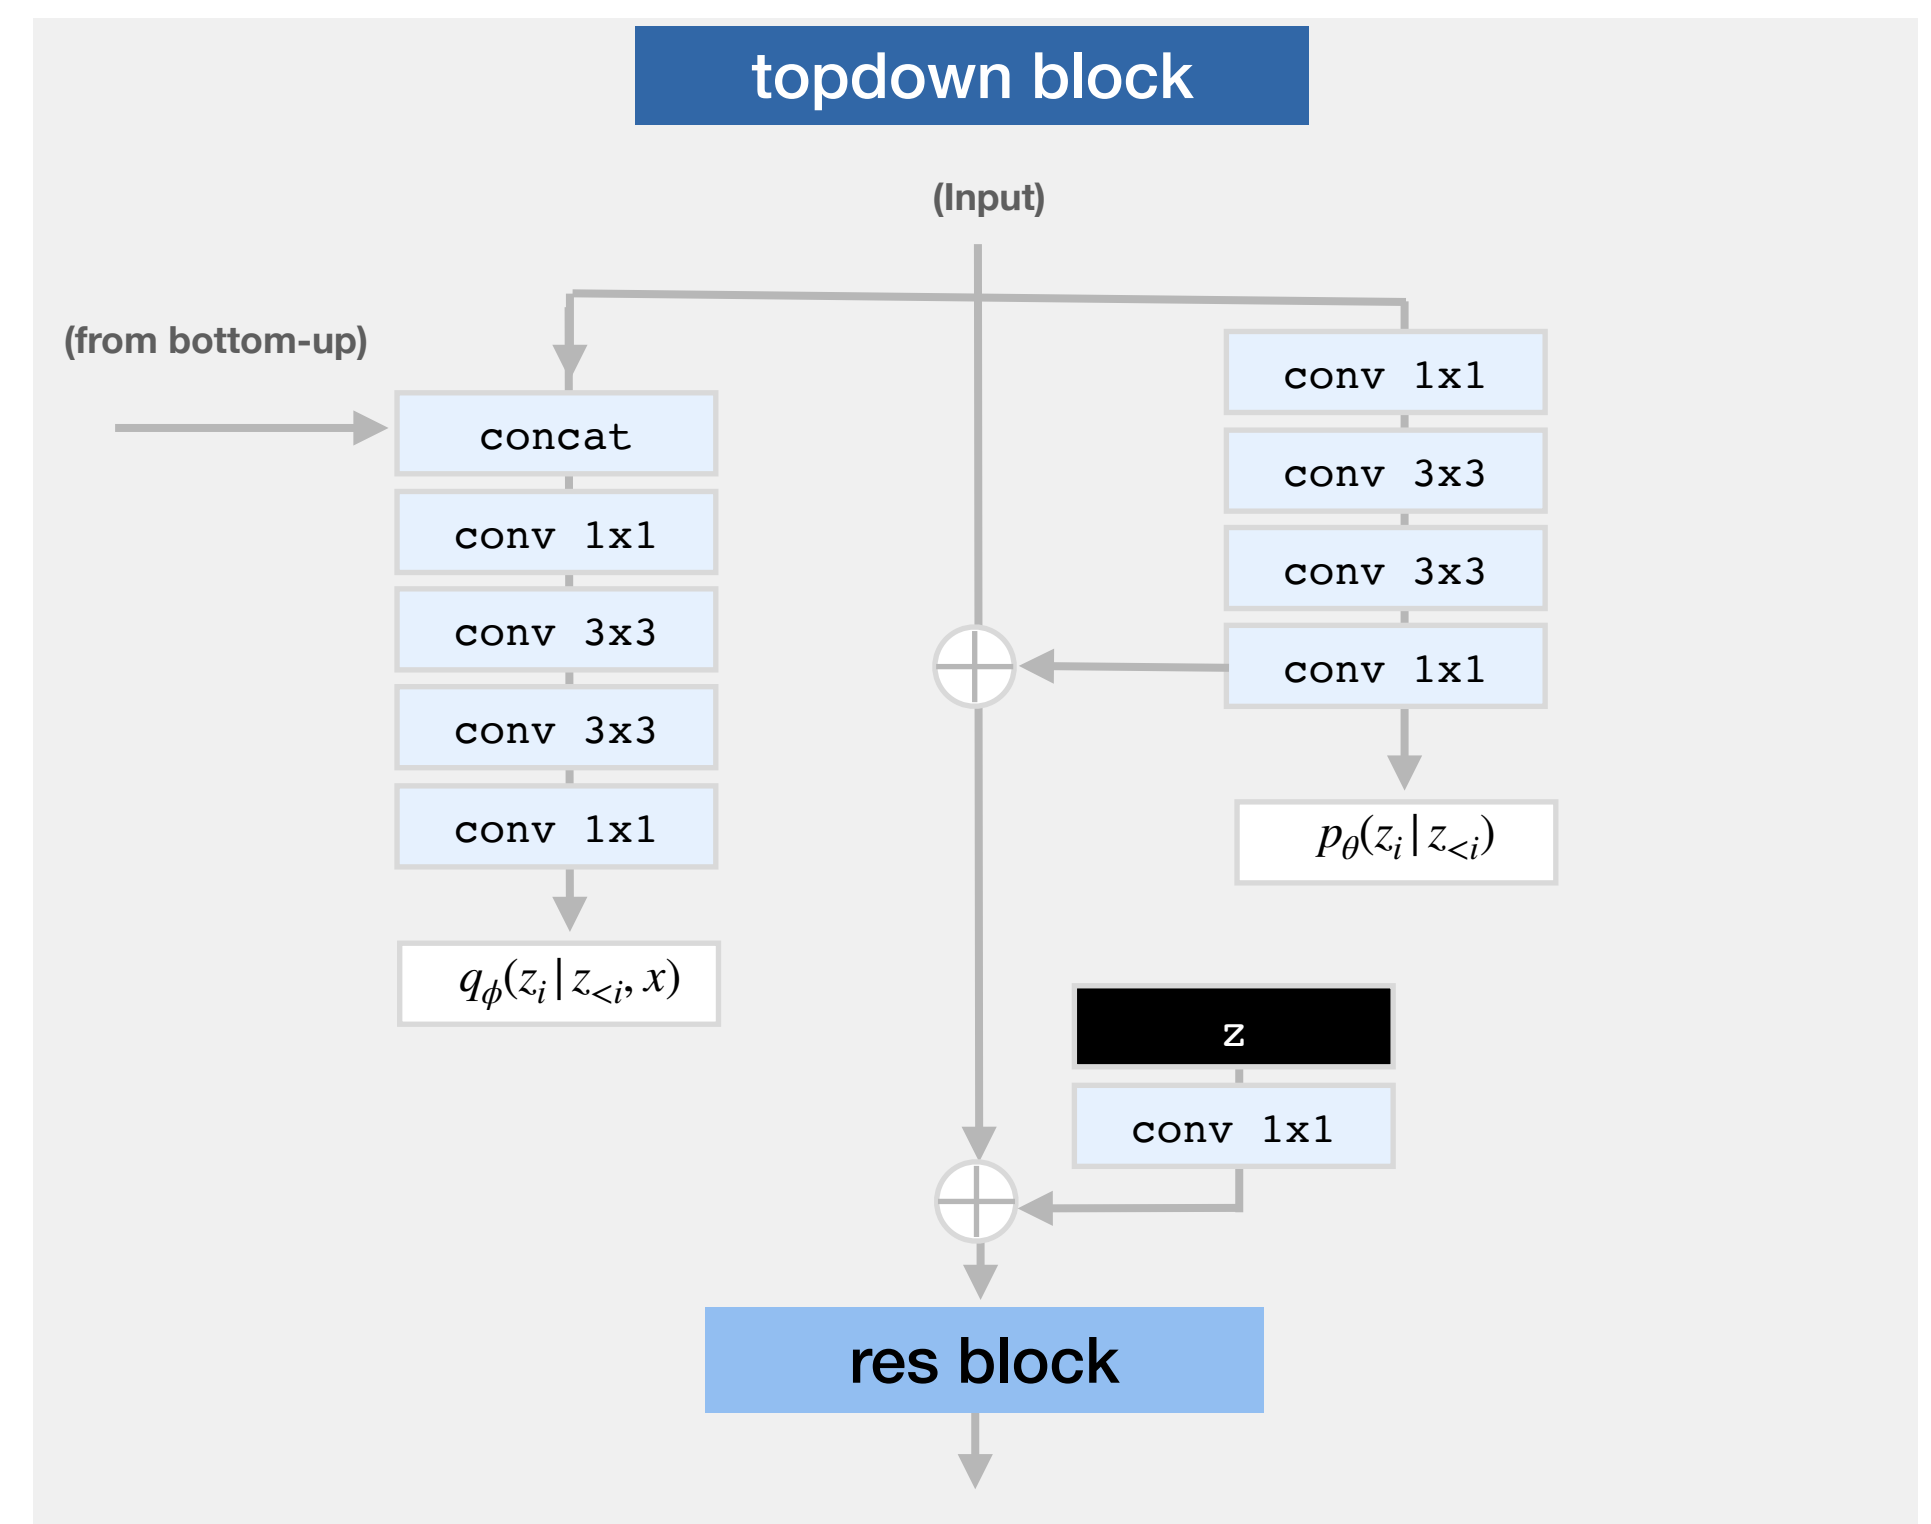

Supplement: supplementary_material [file attachment]

Truth

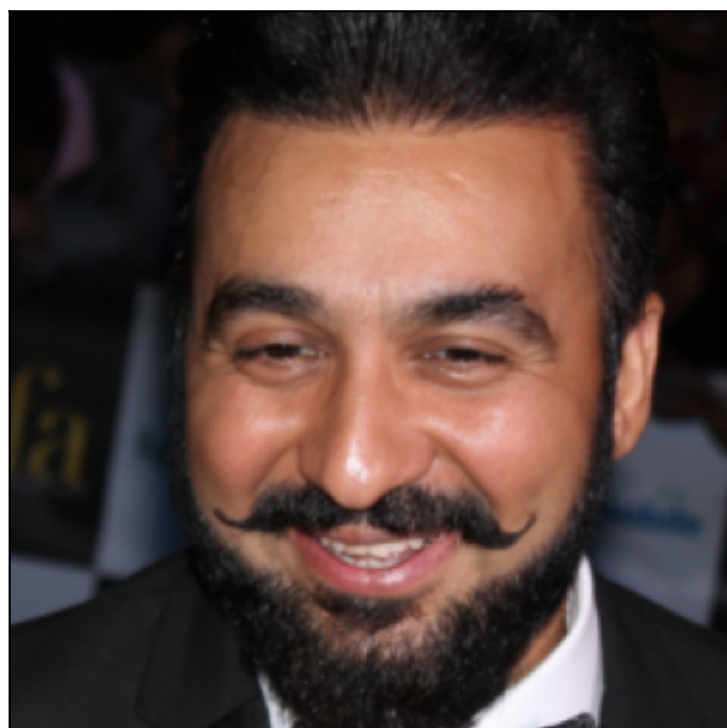

Masked

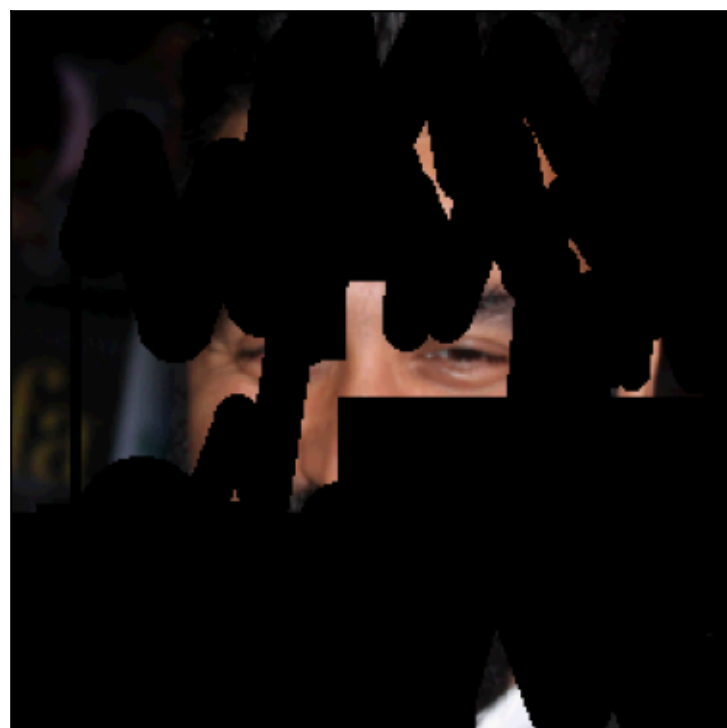

QAVI (Reduced model)

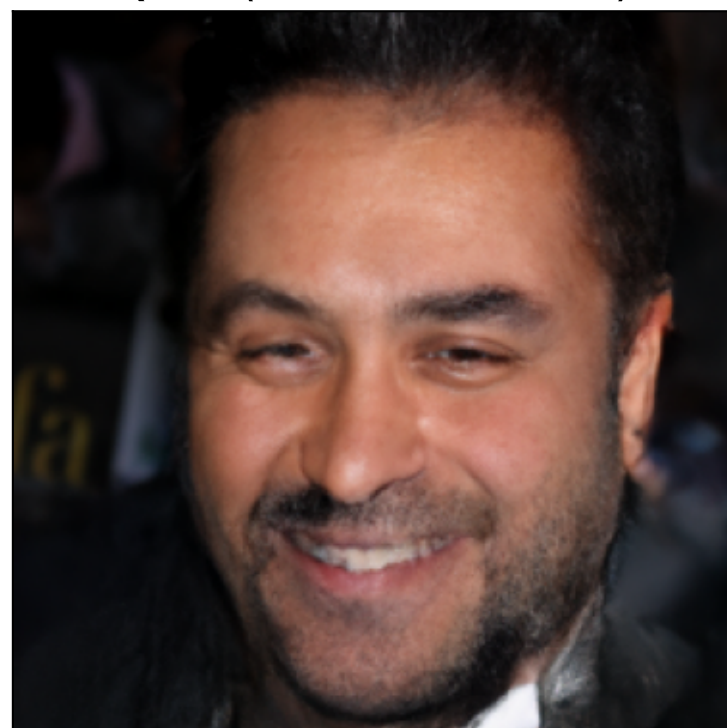

QAVI (Original model)

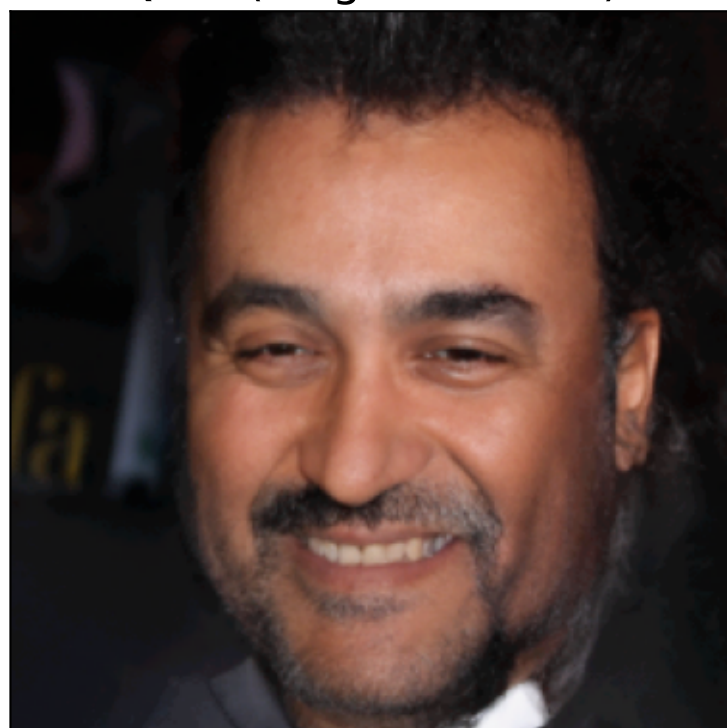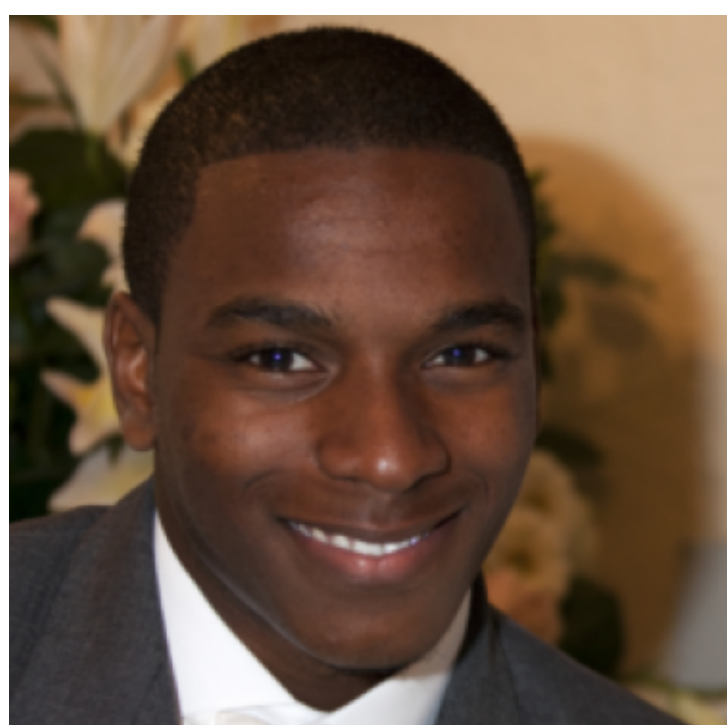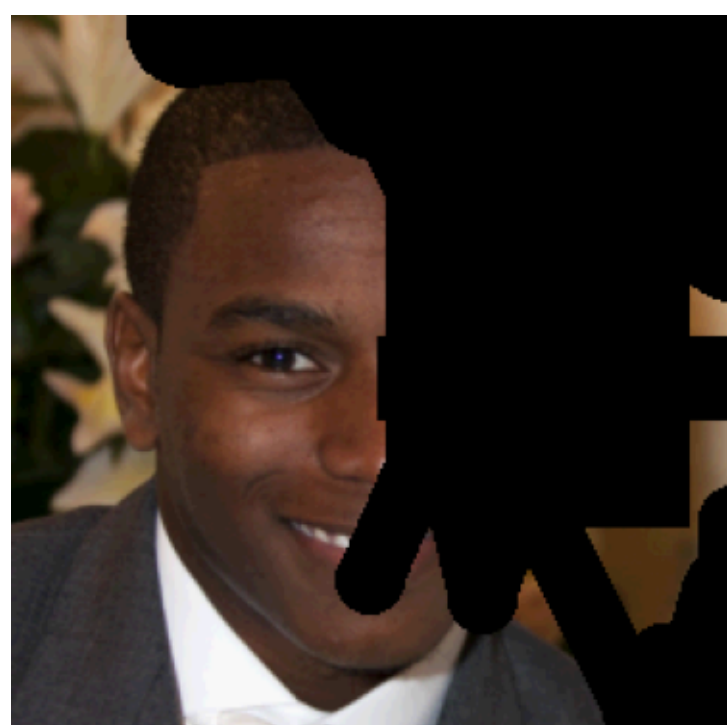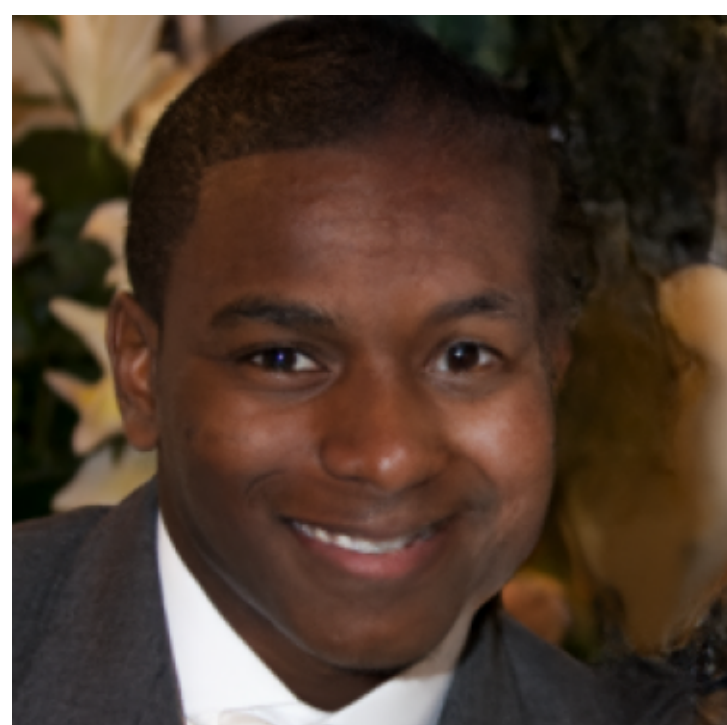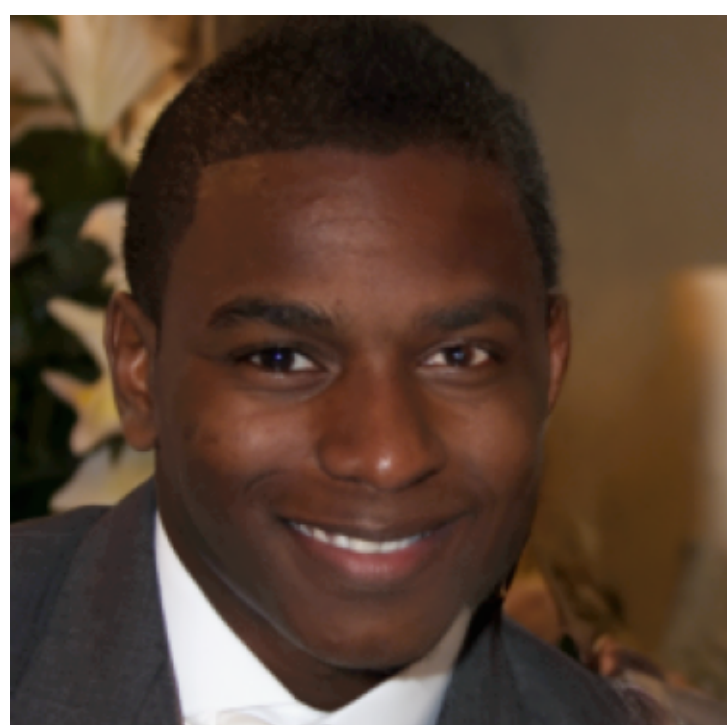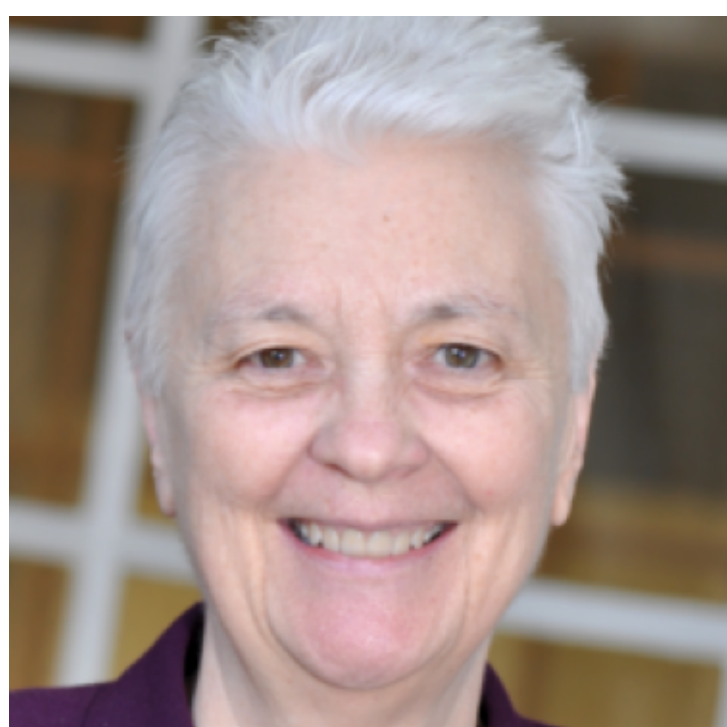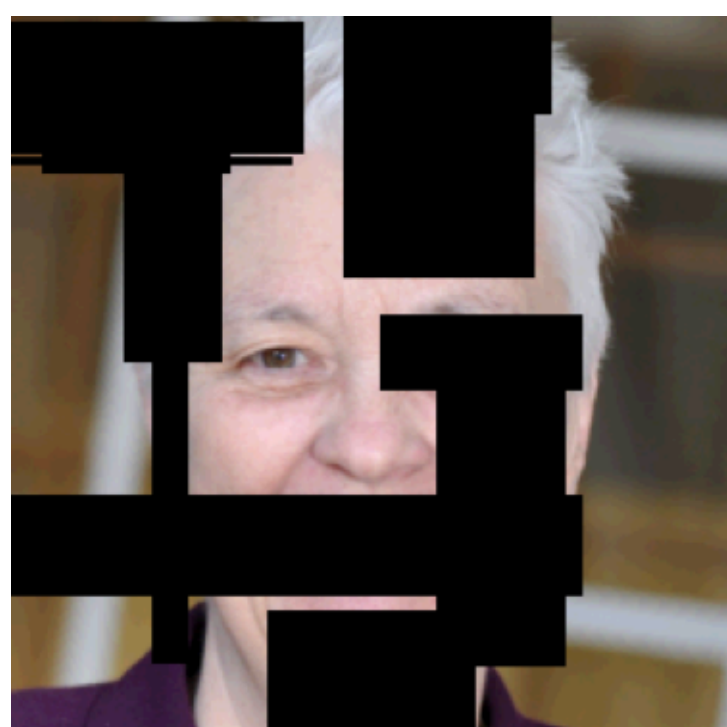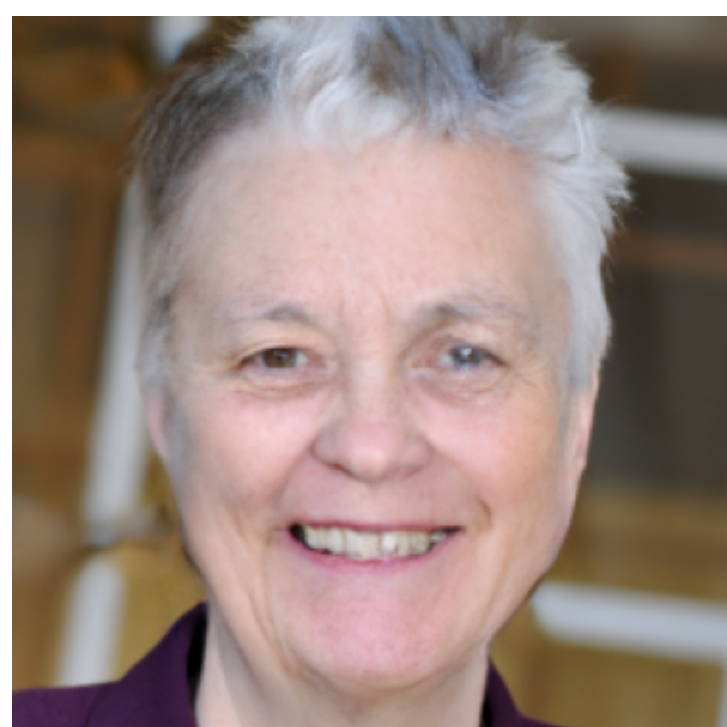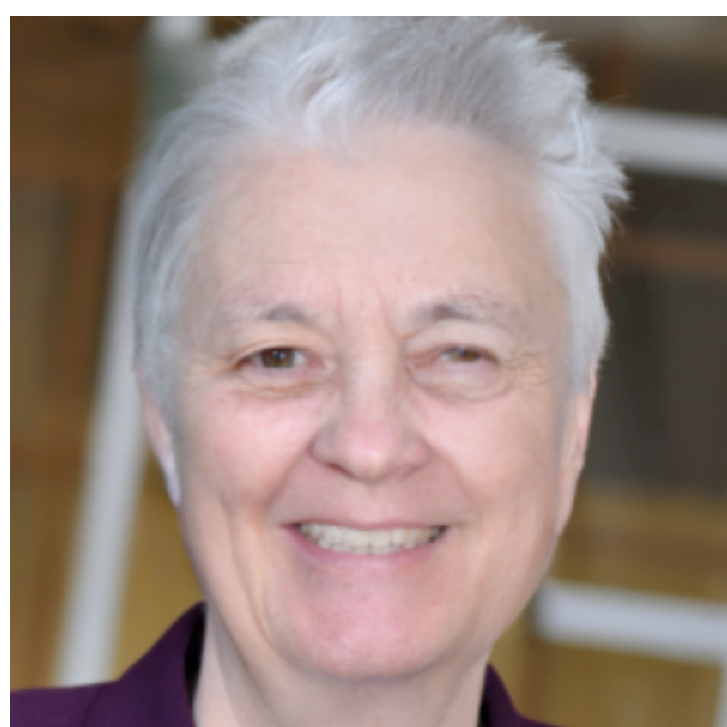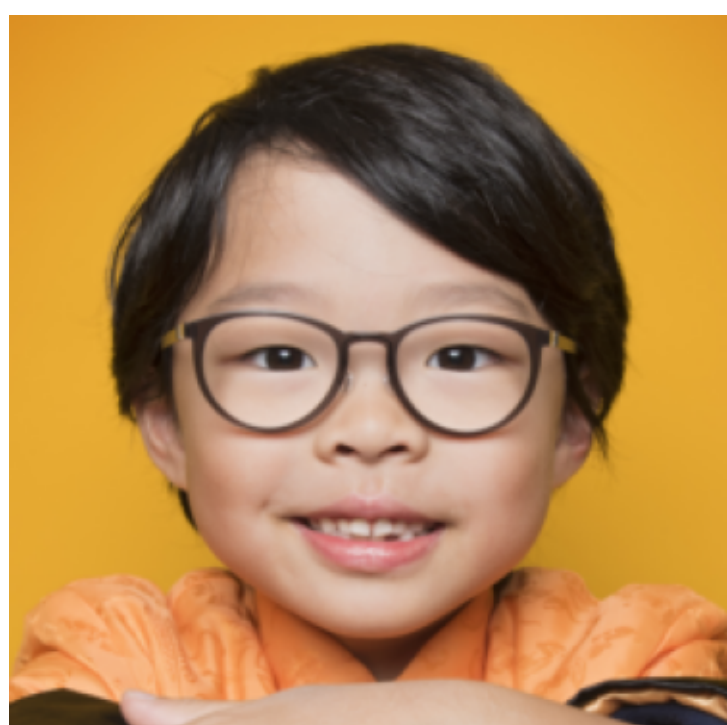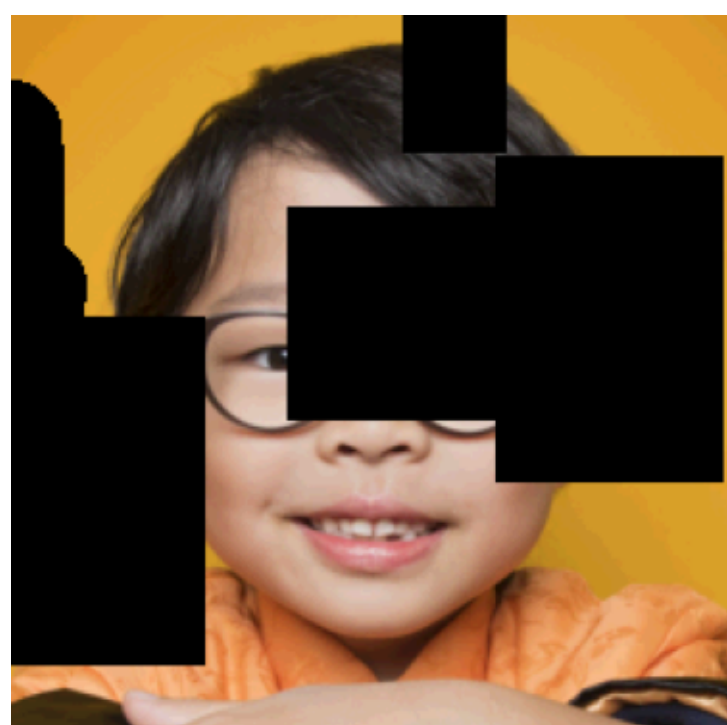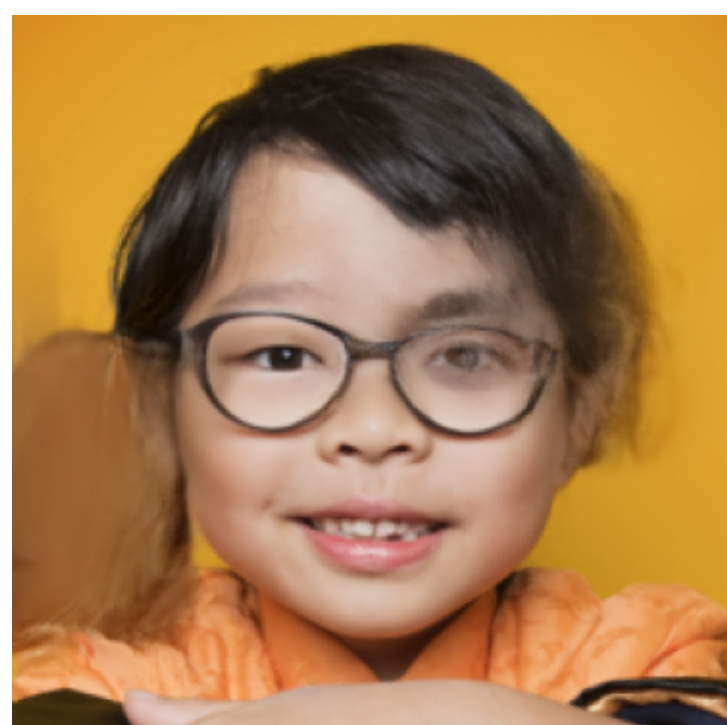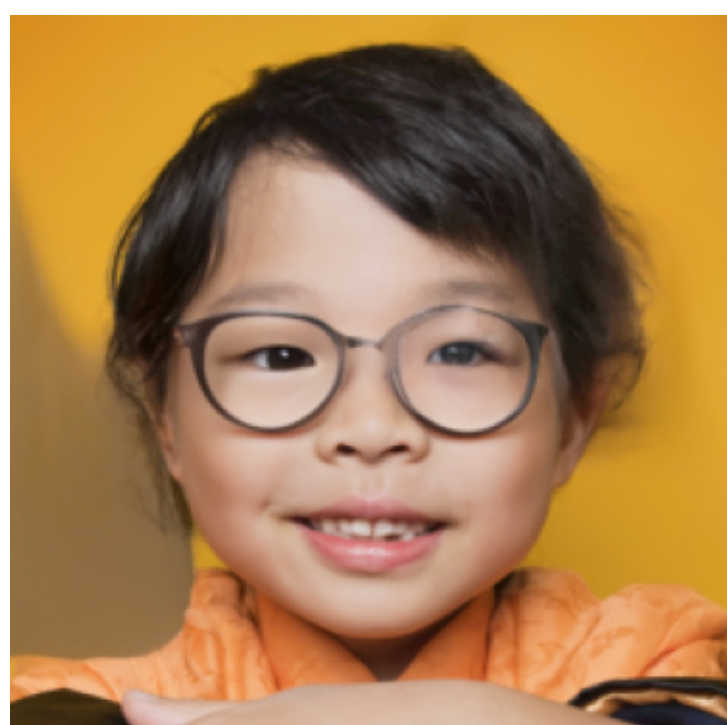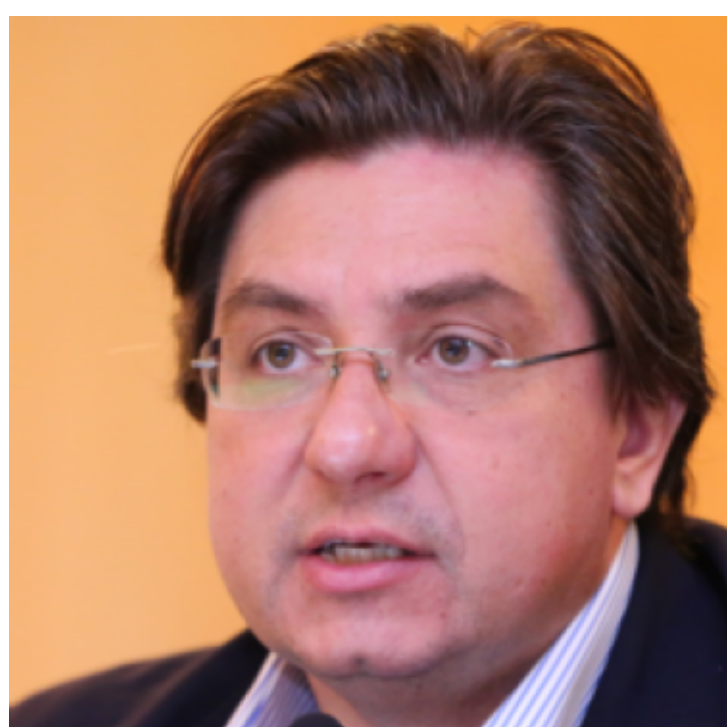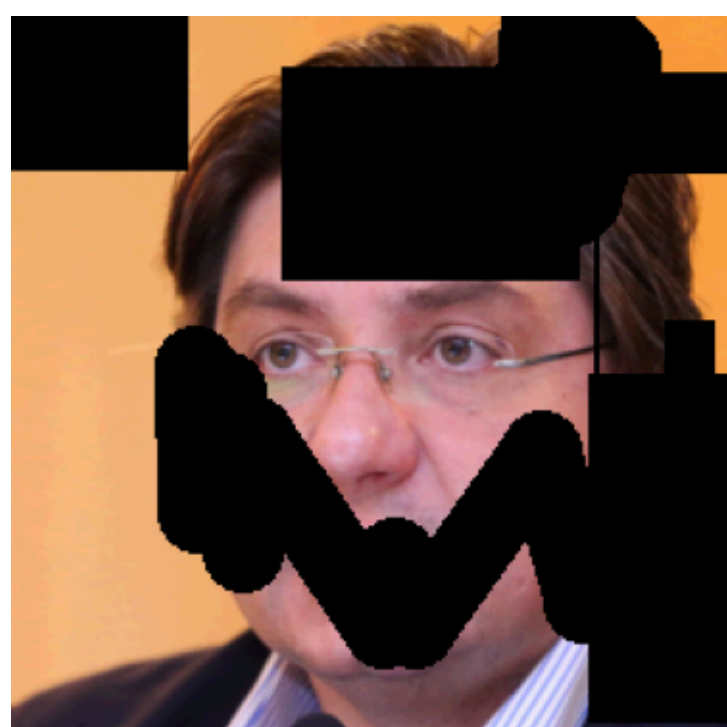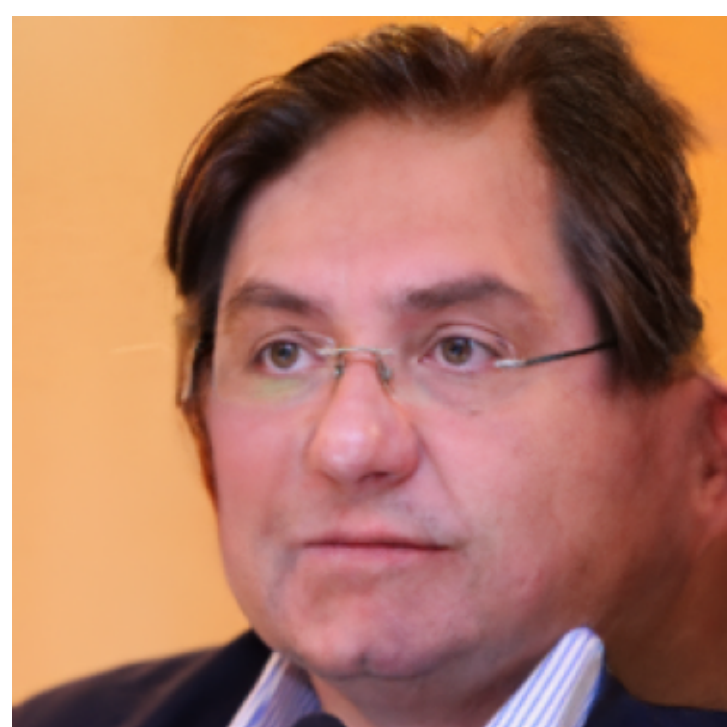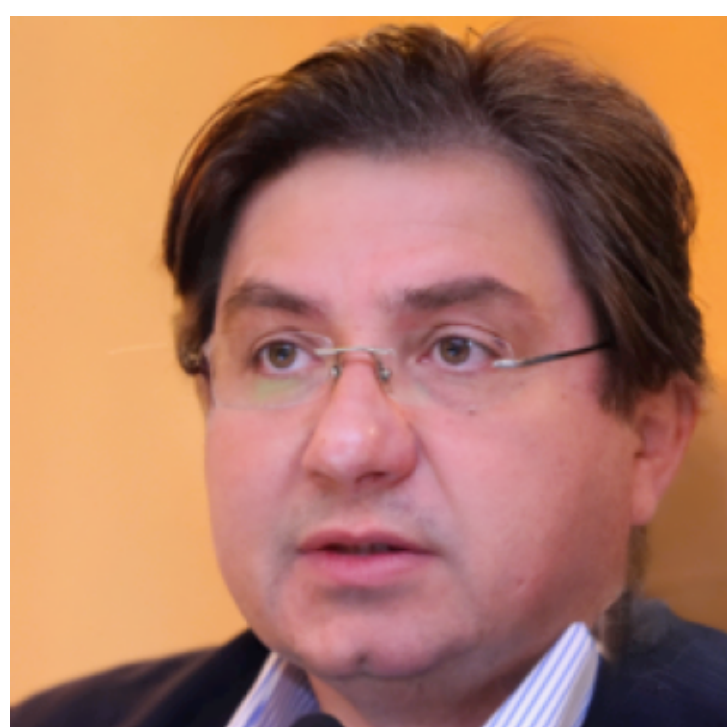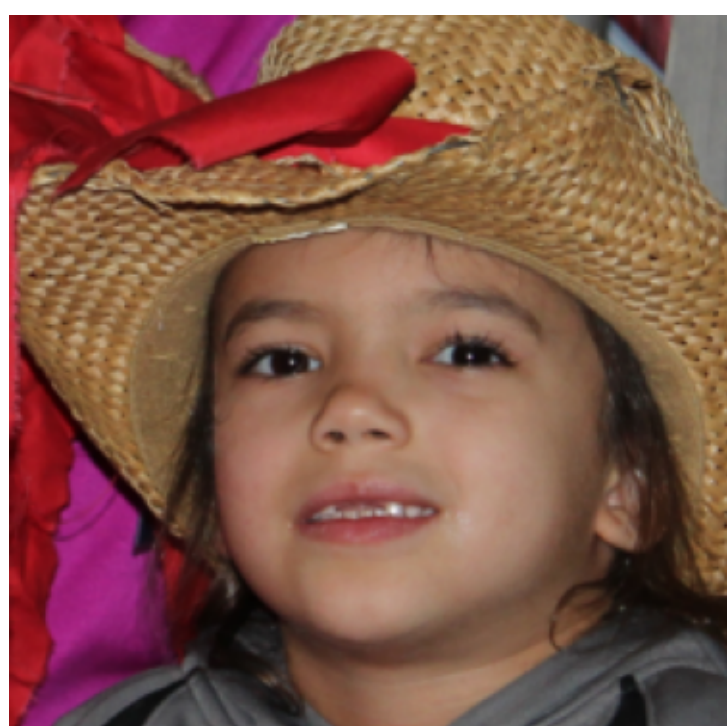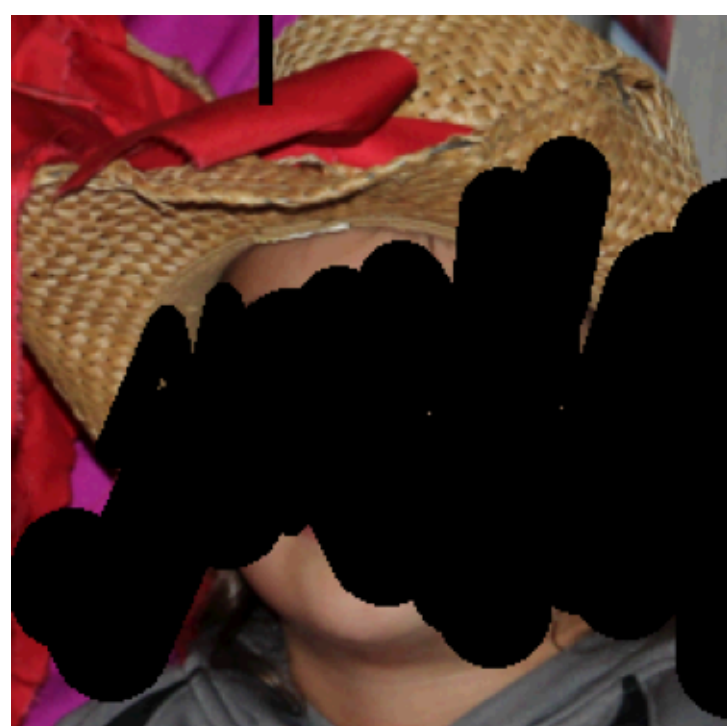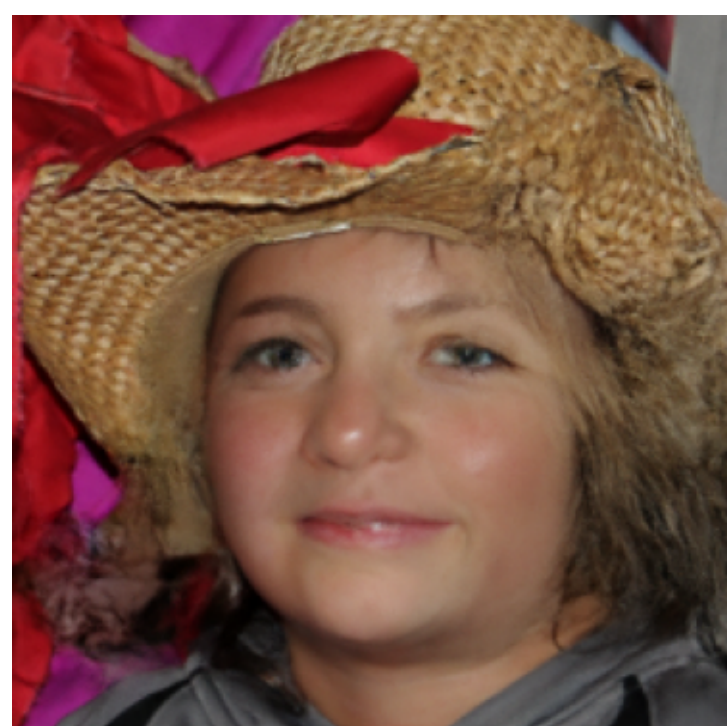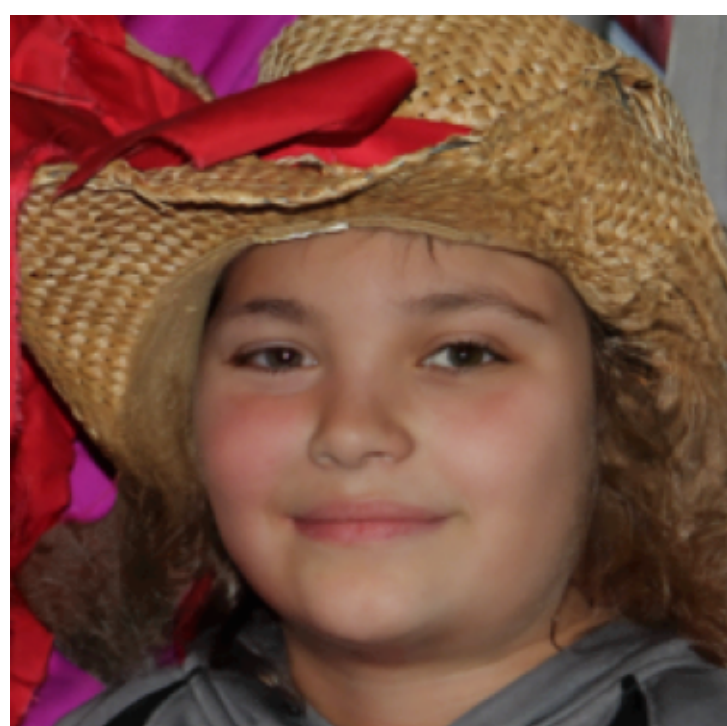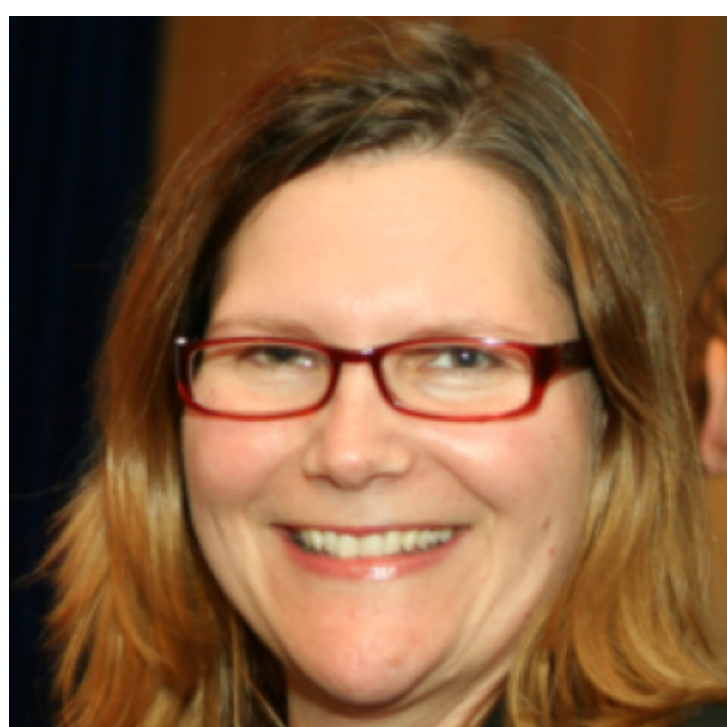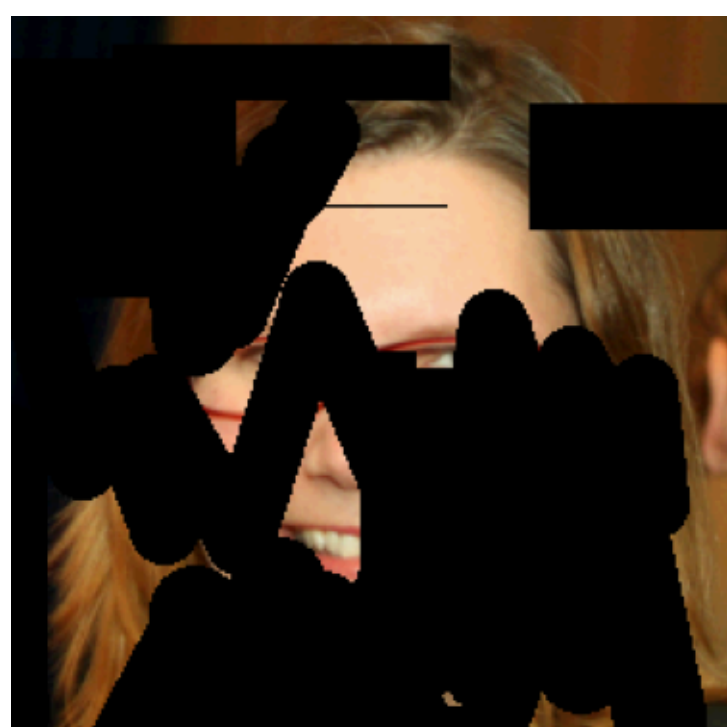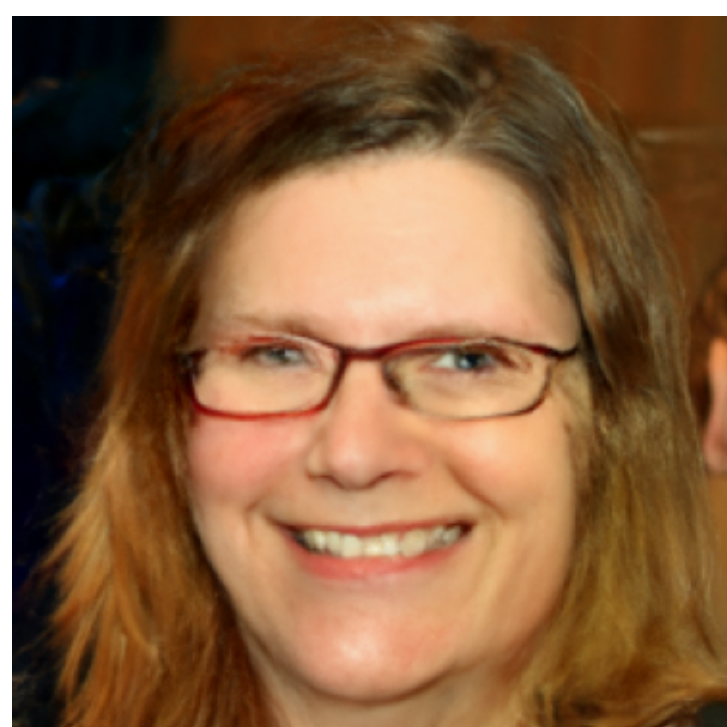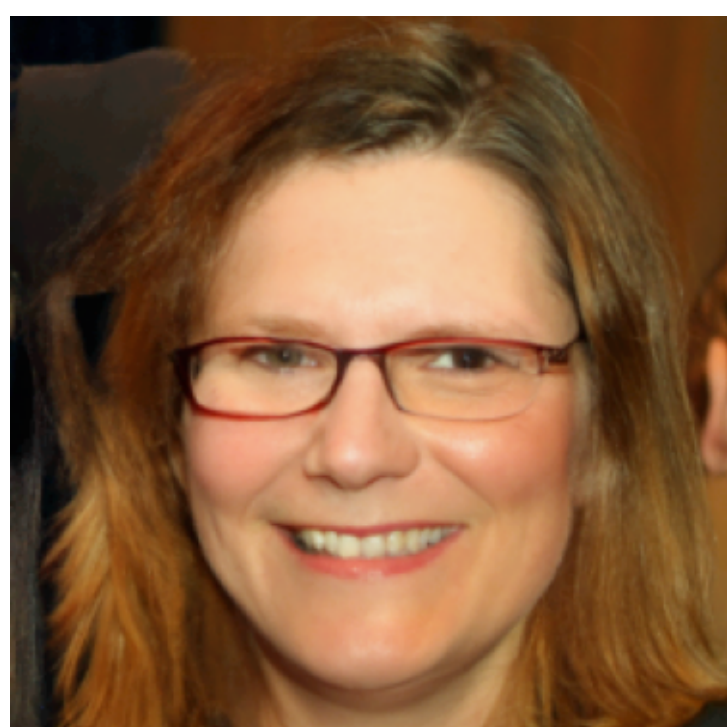

Supplement: supplementary_material [file attachment]

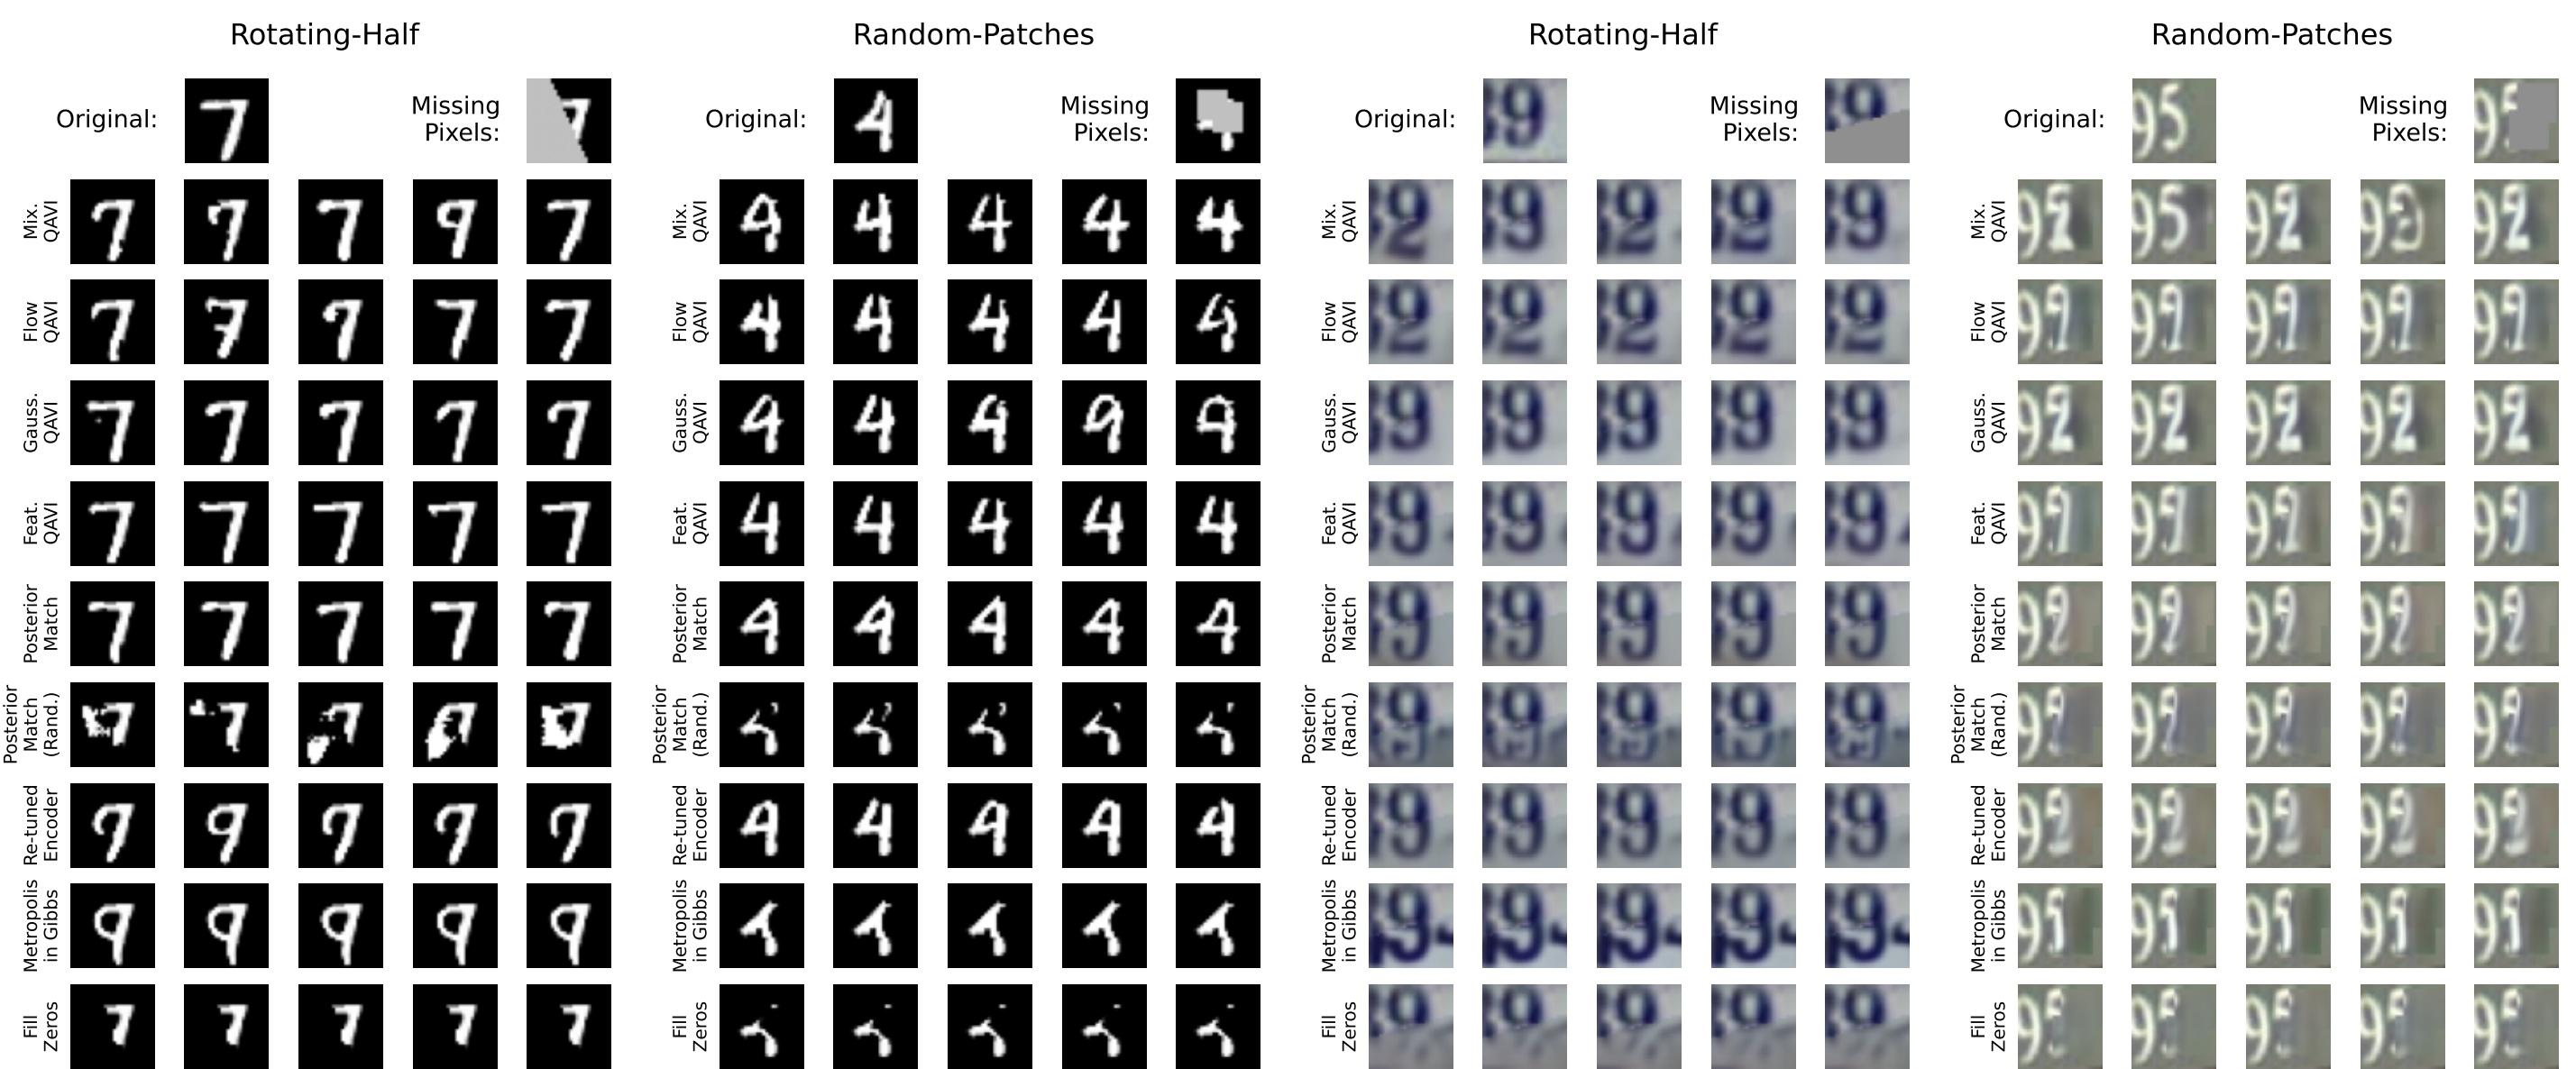

Supplement: supplementary_material [file attachment]

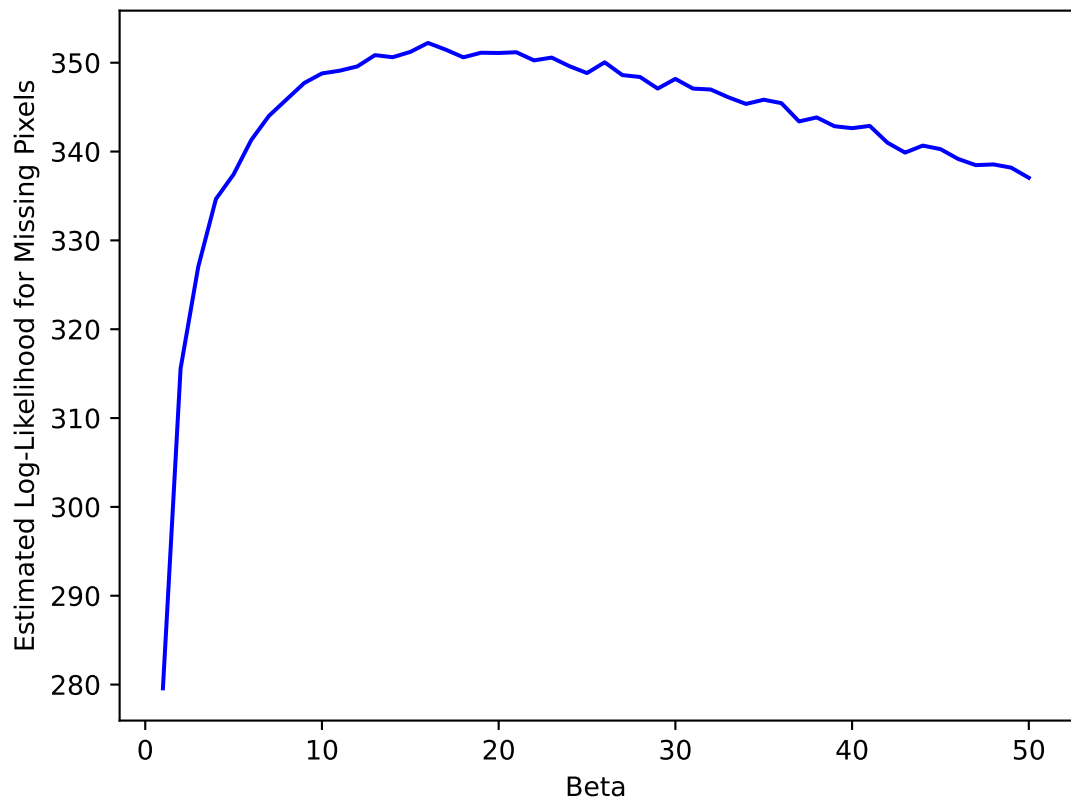

Supplement: supplementary_material [file attachment]

Truth

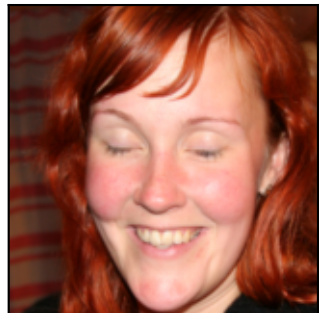

Unamortized

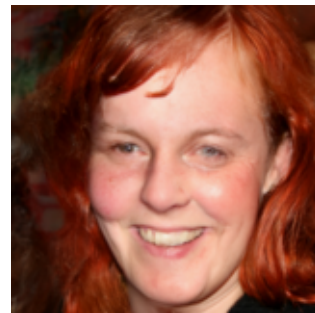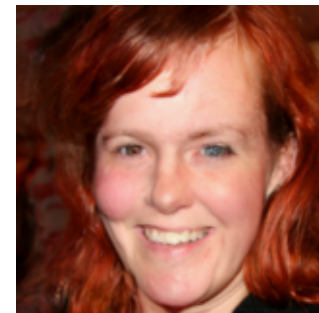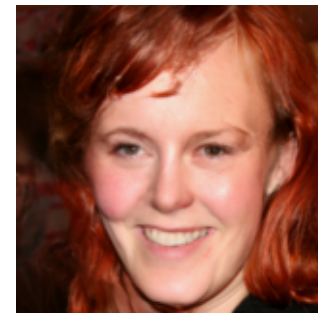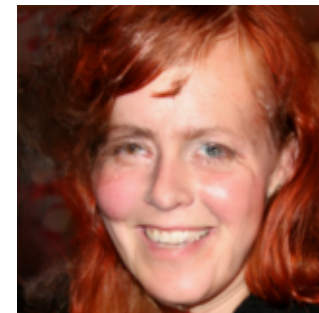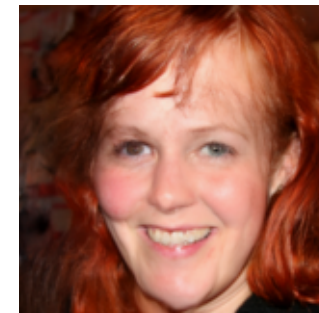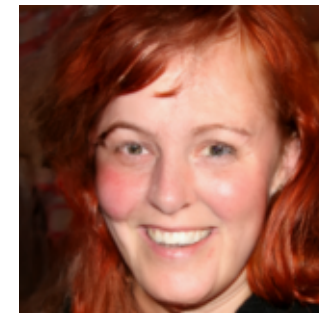

Masked

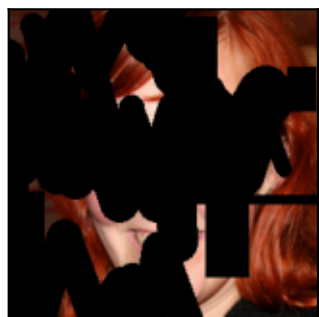

Posterior-Matching

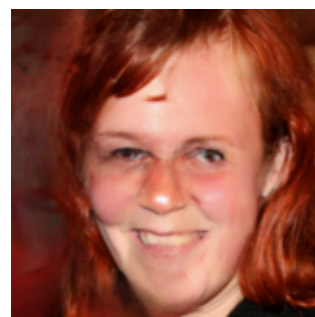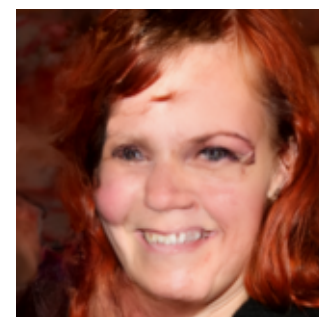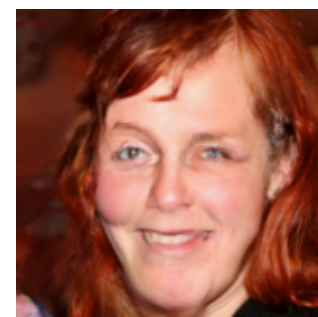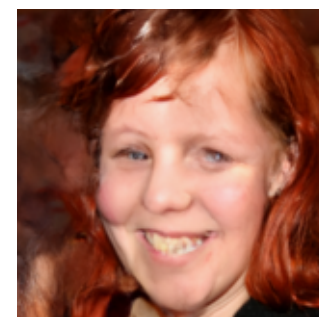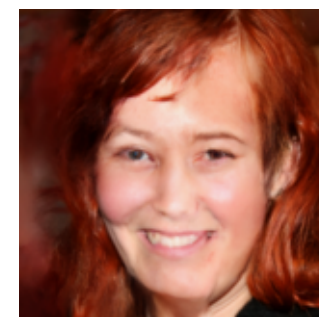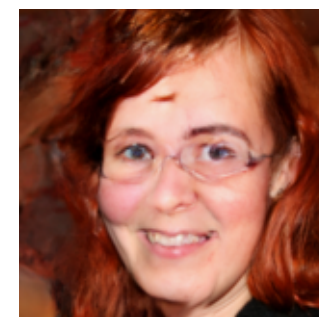

Mask

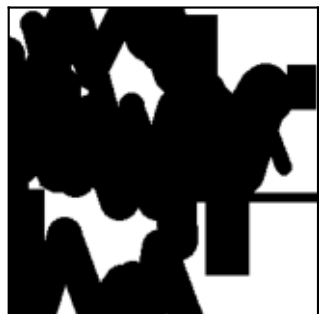

IPA

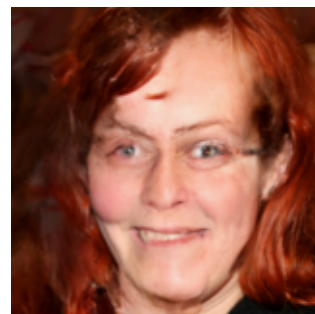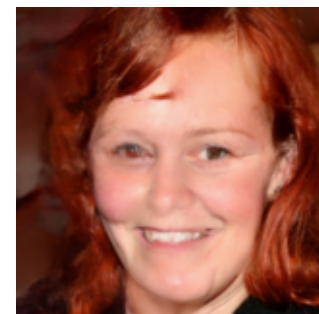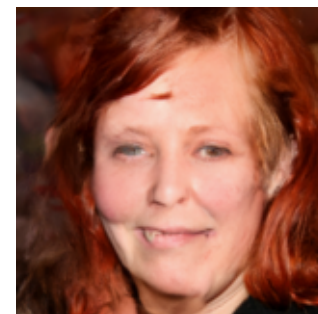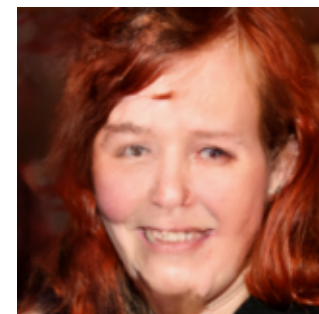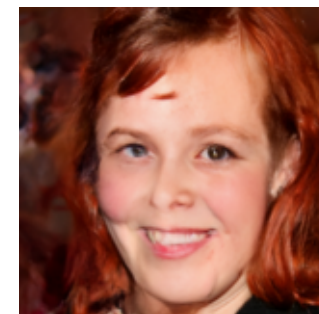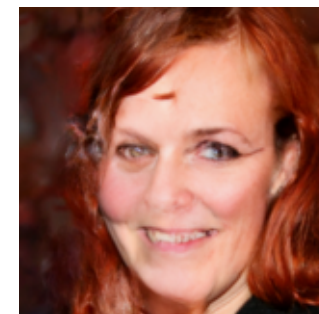

Inception distances (from truth)

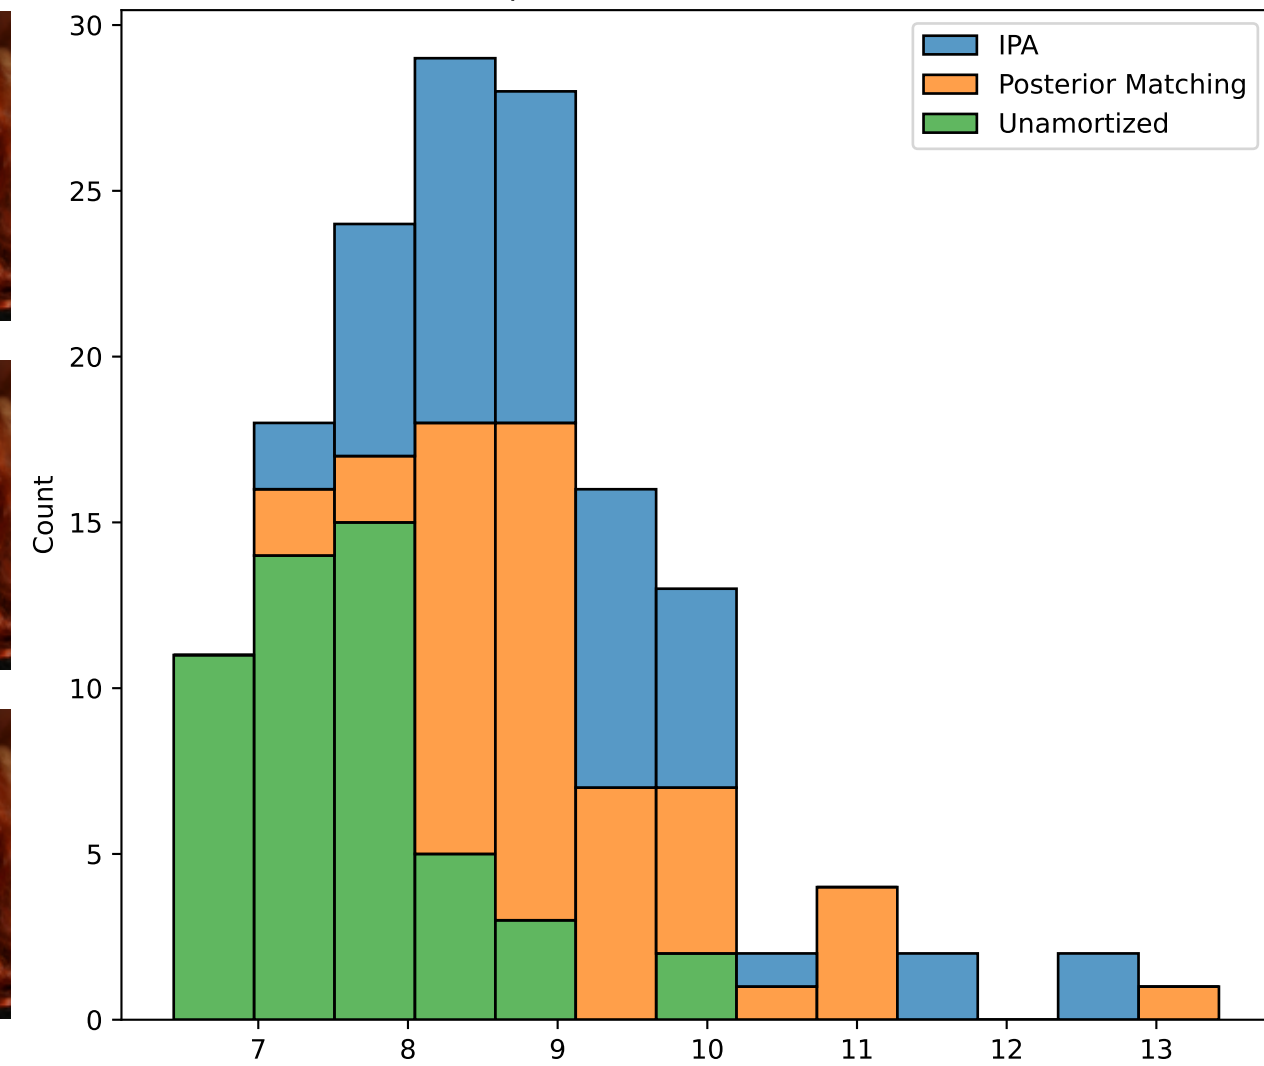

Supplement: supplementary_material [file attachment]

Truth

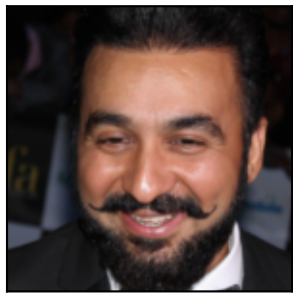

QAVI  
(Full model)

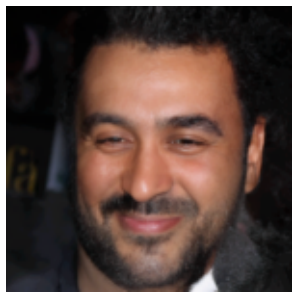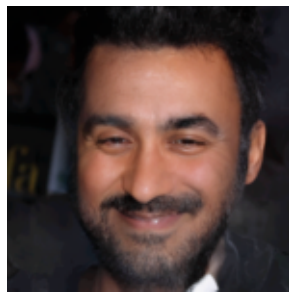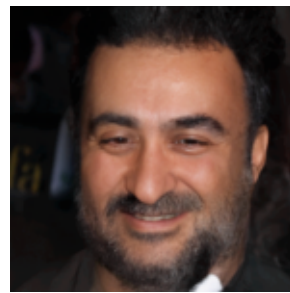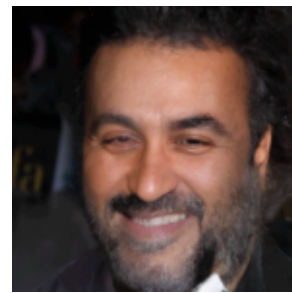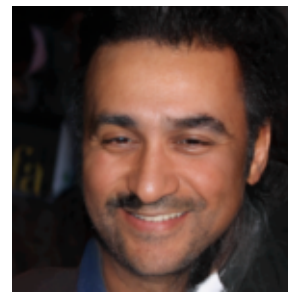

Masked

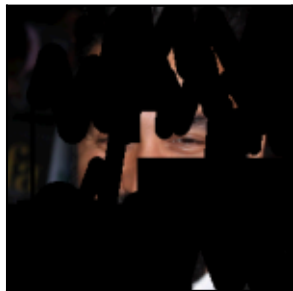

QAVI

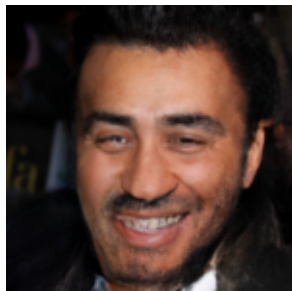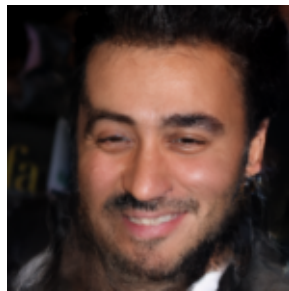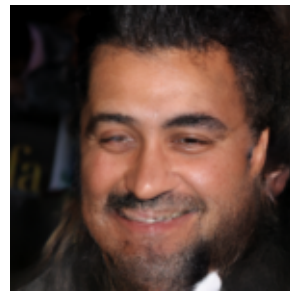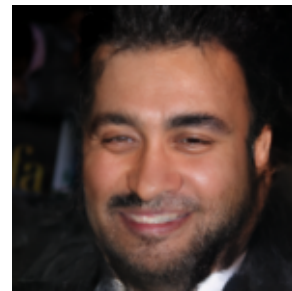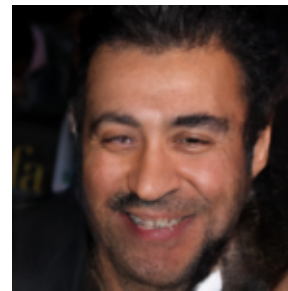

Mask

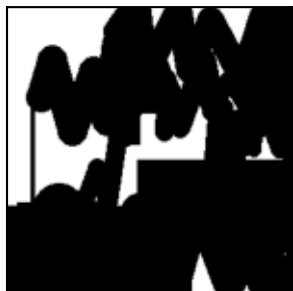

Posterior-  
Matching

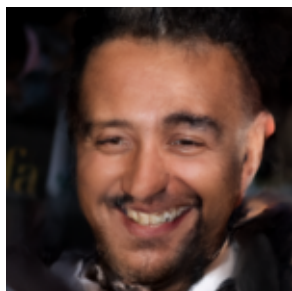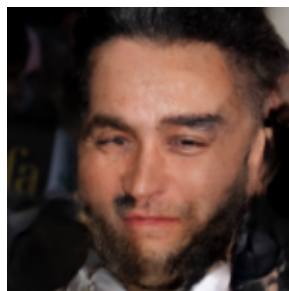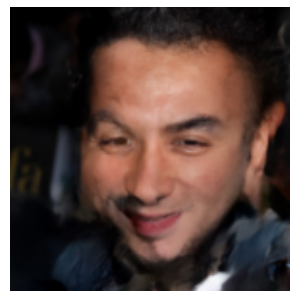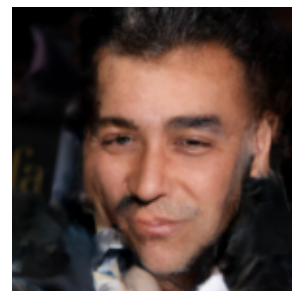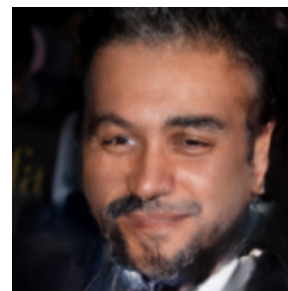

VAEAC

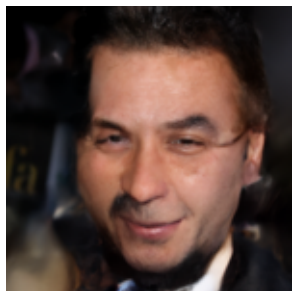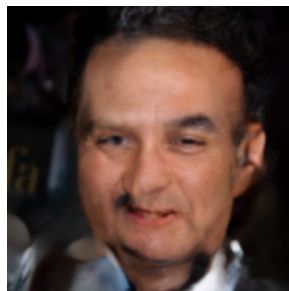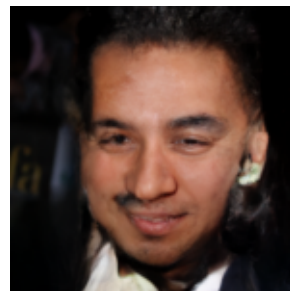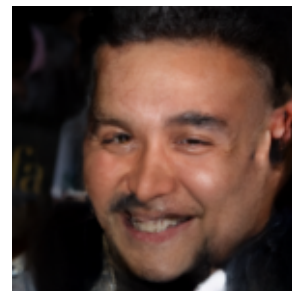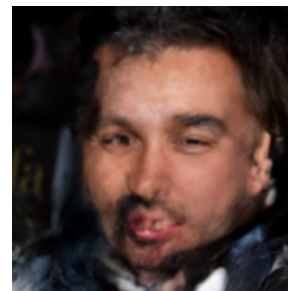

Supplement: supplementary_material [file attachment]

Truth

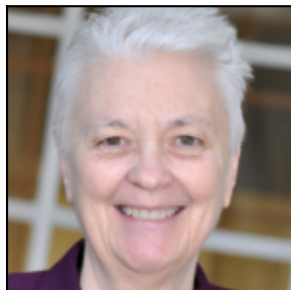

QAVI  
(Full model)

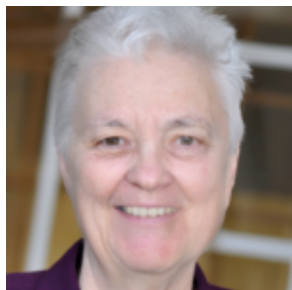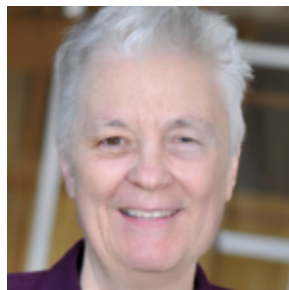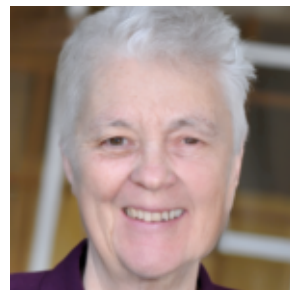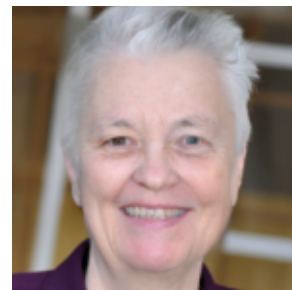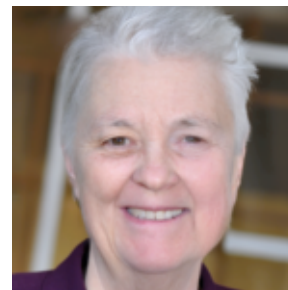

Masked

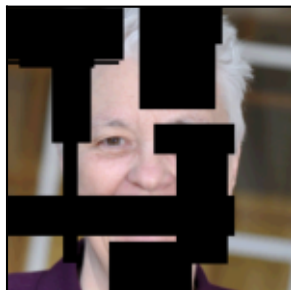

QAVI

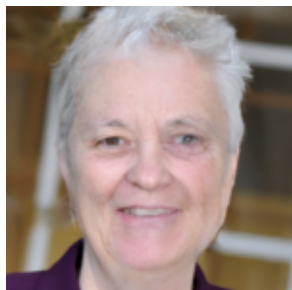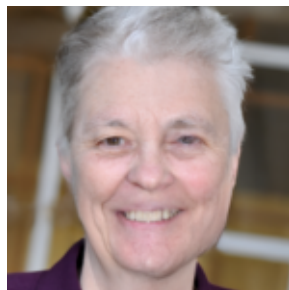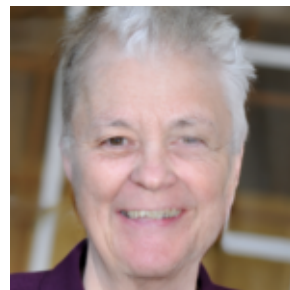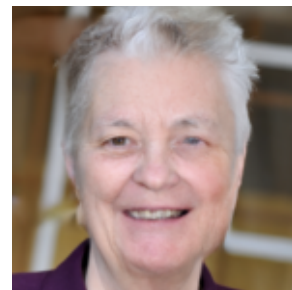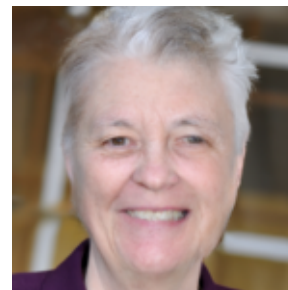

Mask

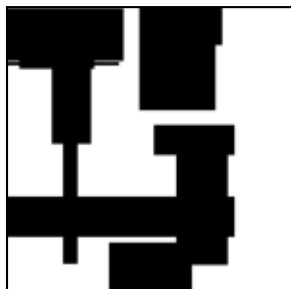

Posterior-  
Matching

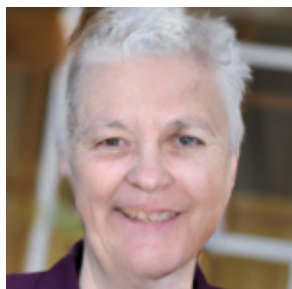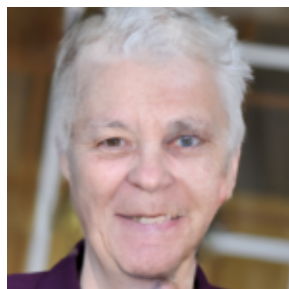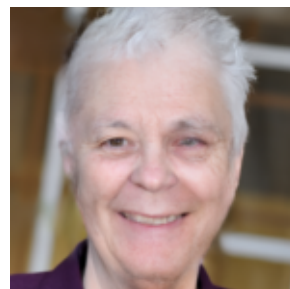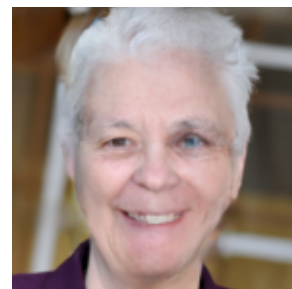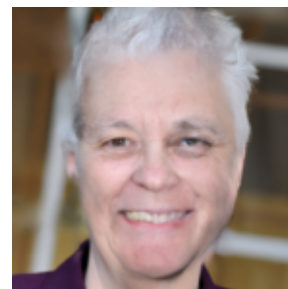

VAEAC

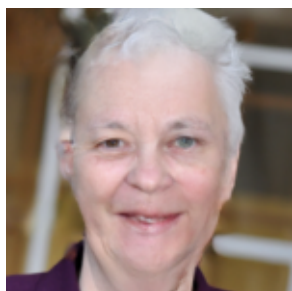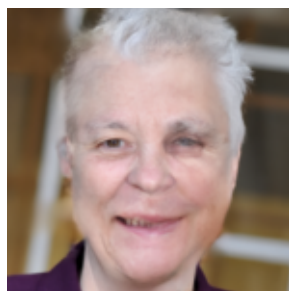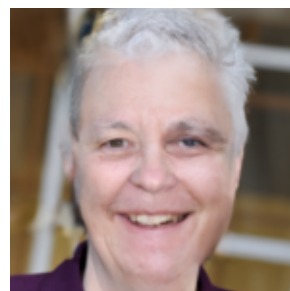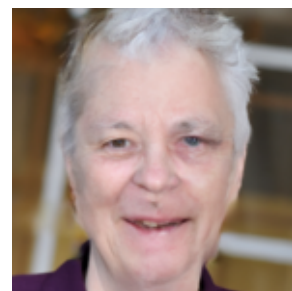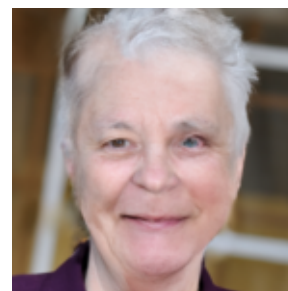

Supplement: supplementary_material [file attachment]

Truth

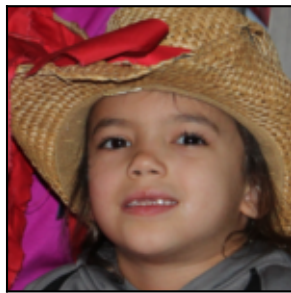

QAVI  
(Full model)

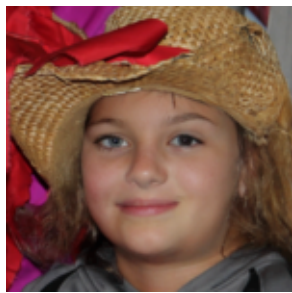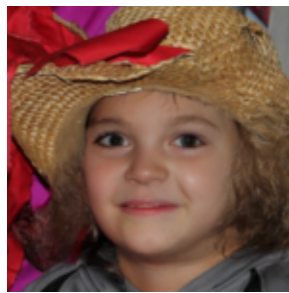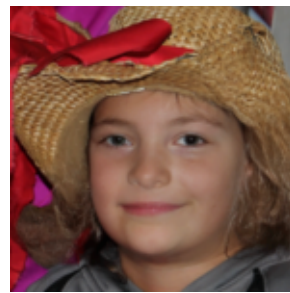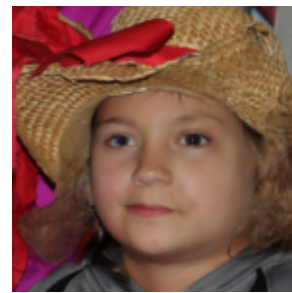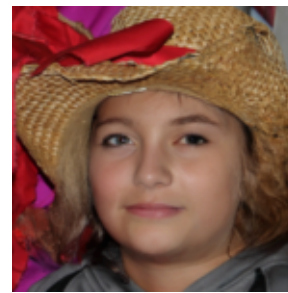

Masked

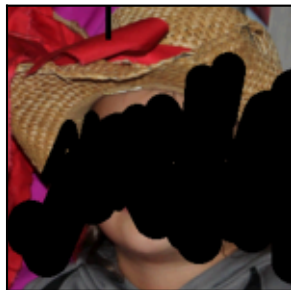

QAVI

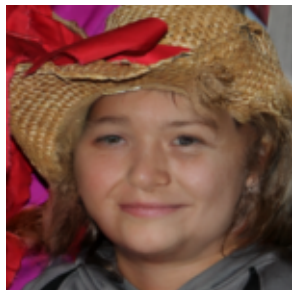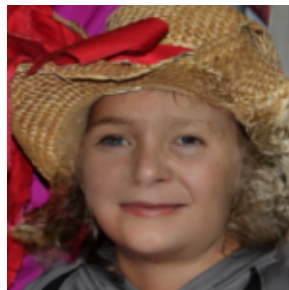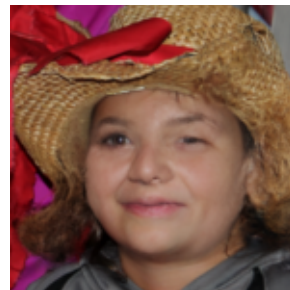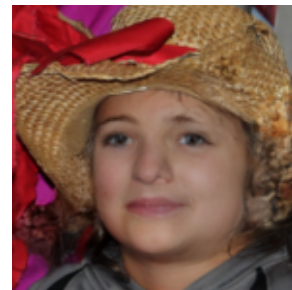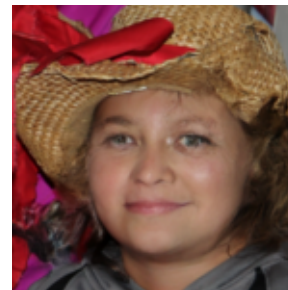

Mask

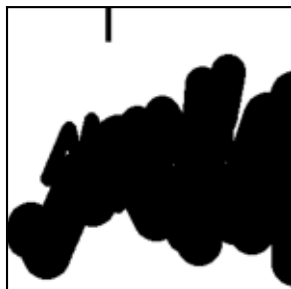

Posterior-  
Matching

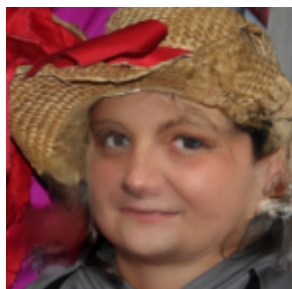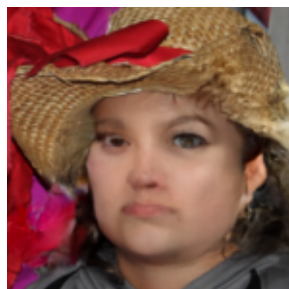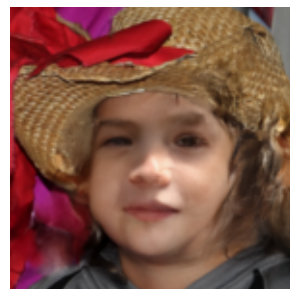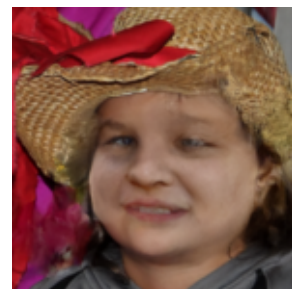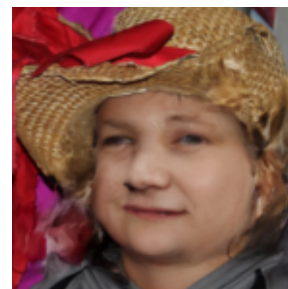

VAEAC

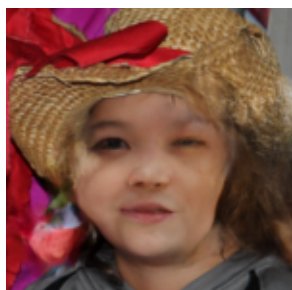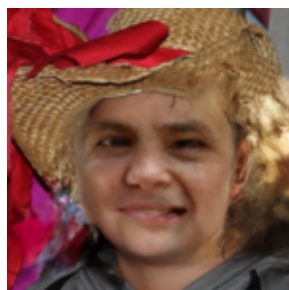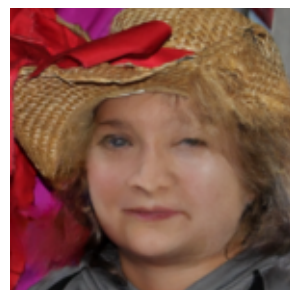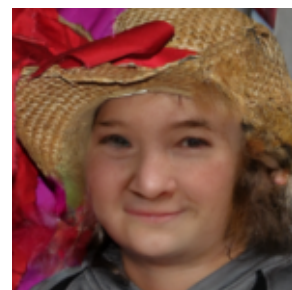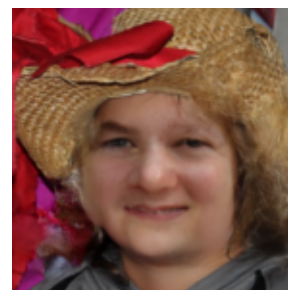

Supplement: supplementary_material [file attachment]

**MNIST**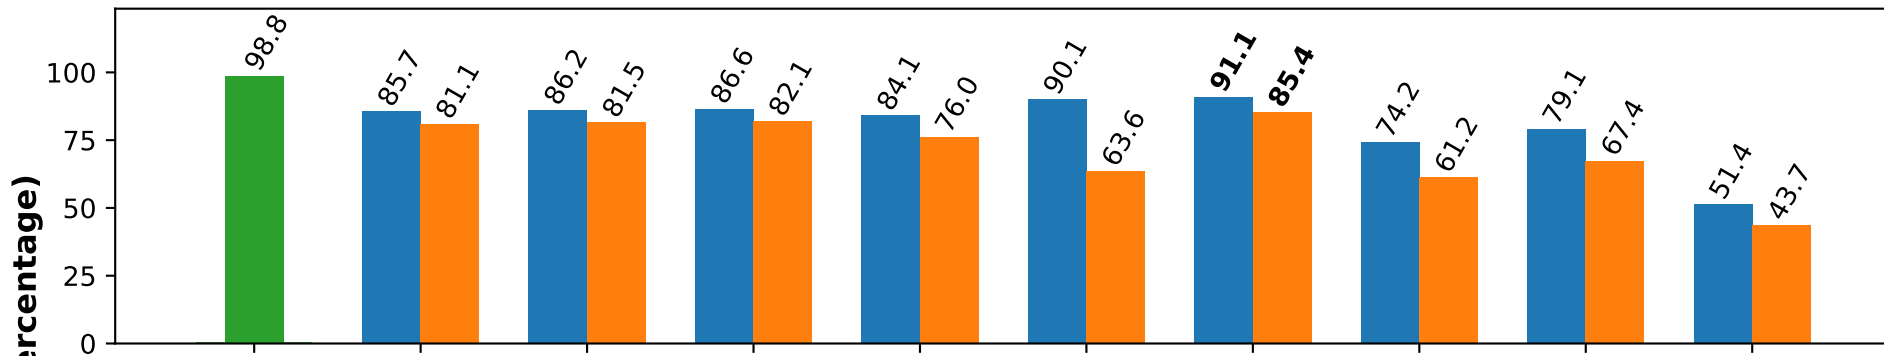**SVHN**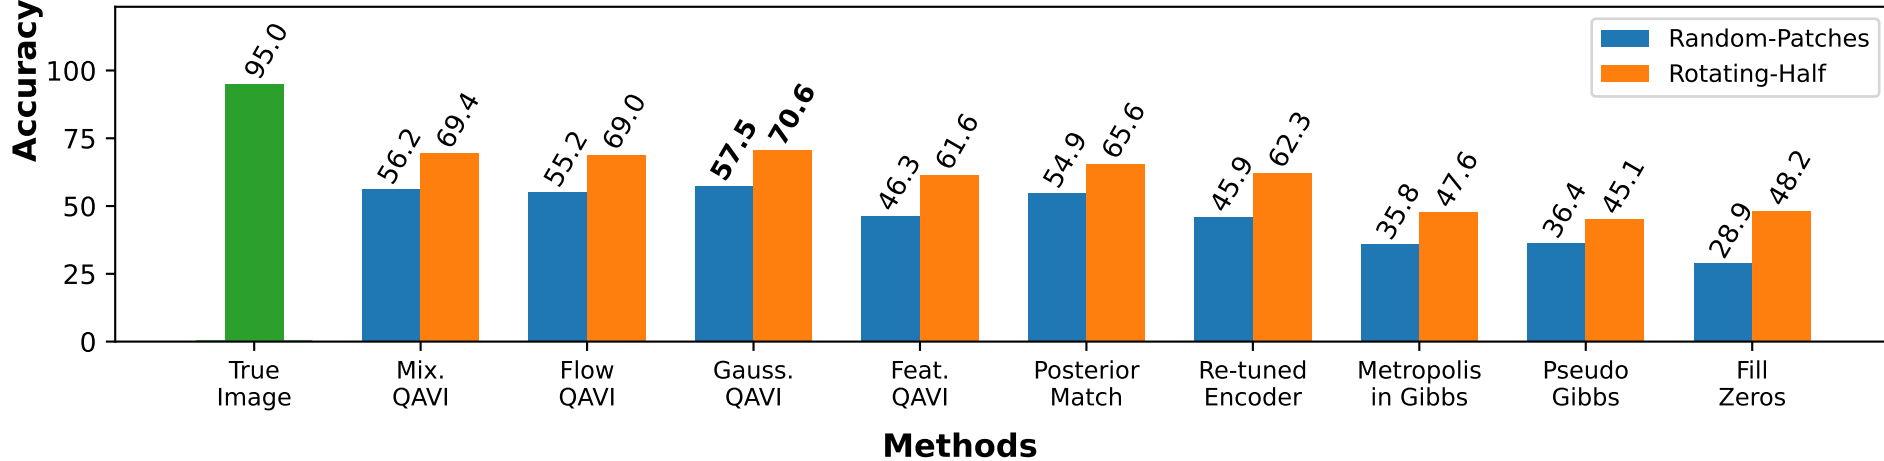

Supplement: supplementary_material [file attachment]

Truth

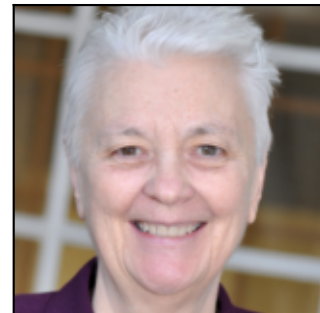

Unamortized

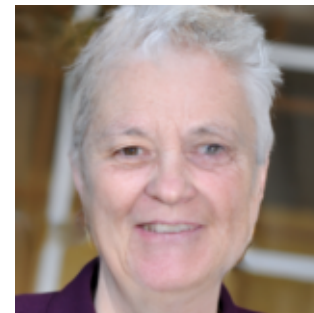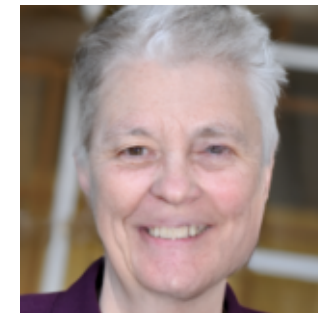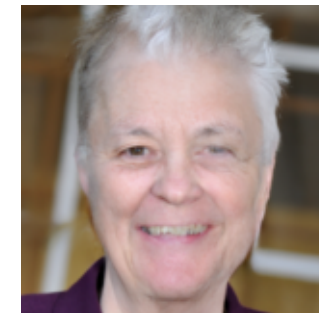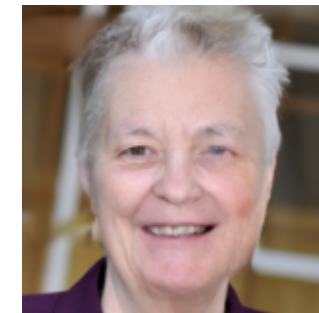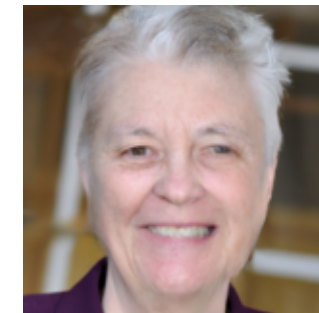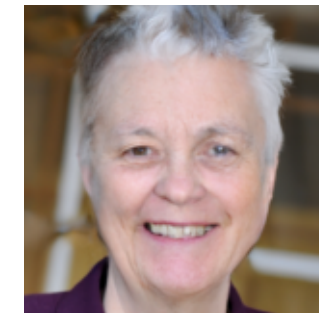

Masked

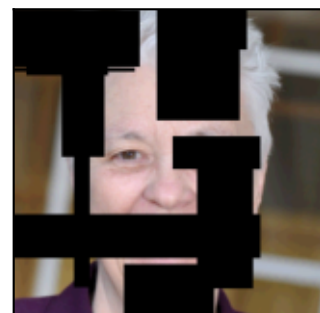

Posterior-Matching

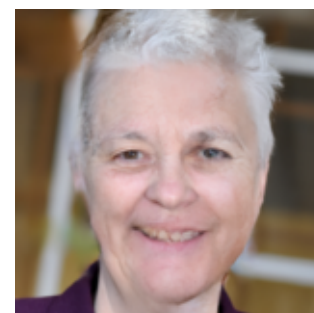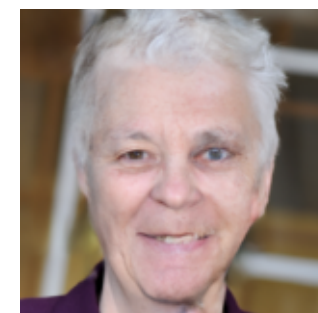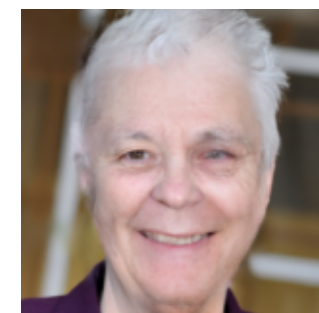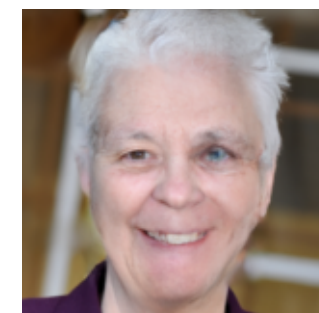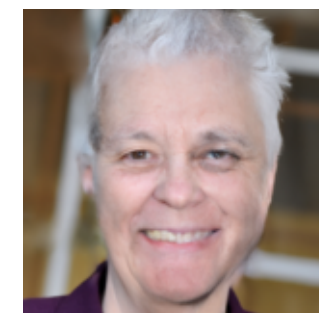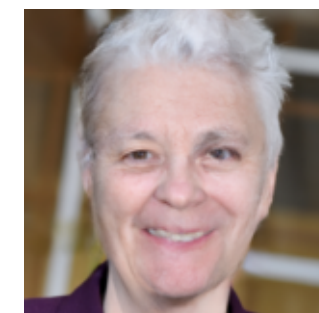

Mask

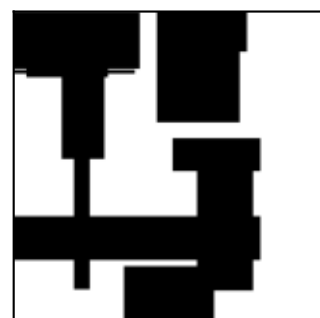

IPA

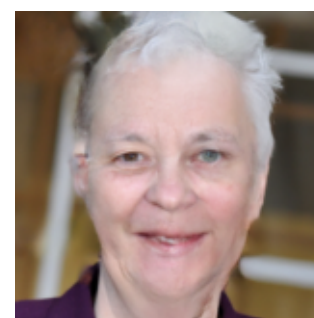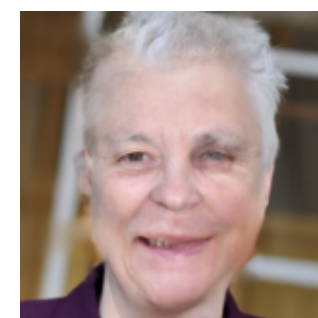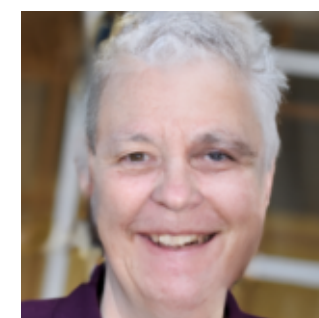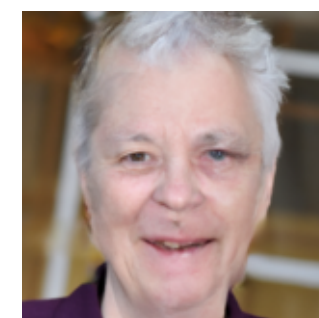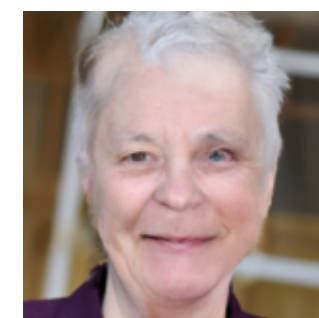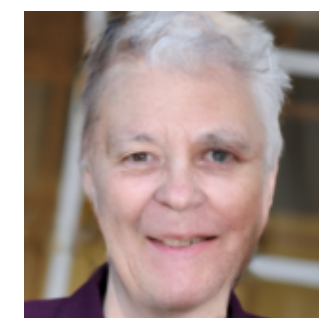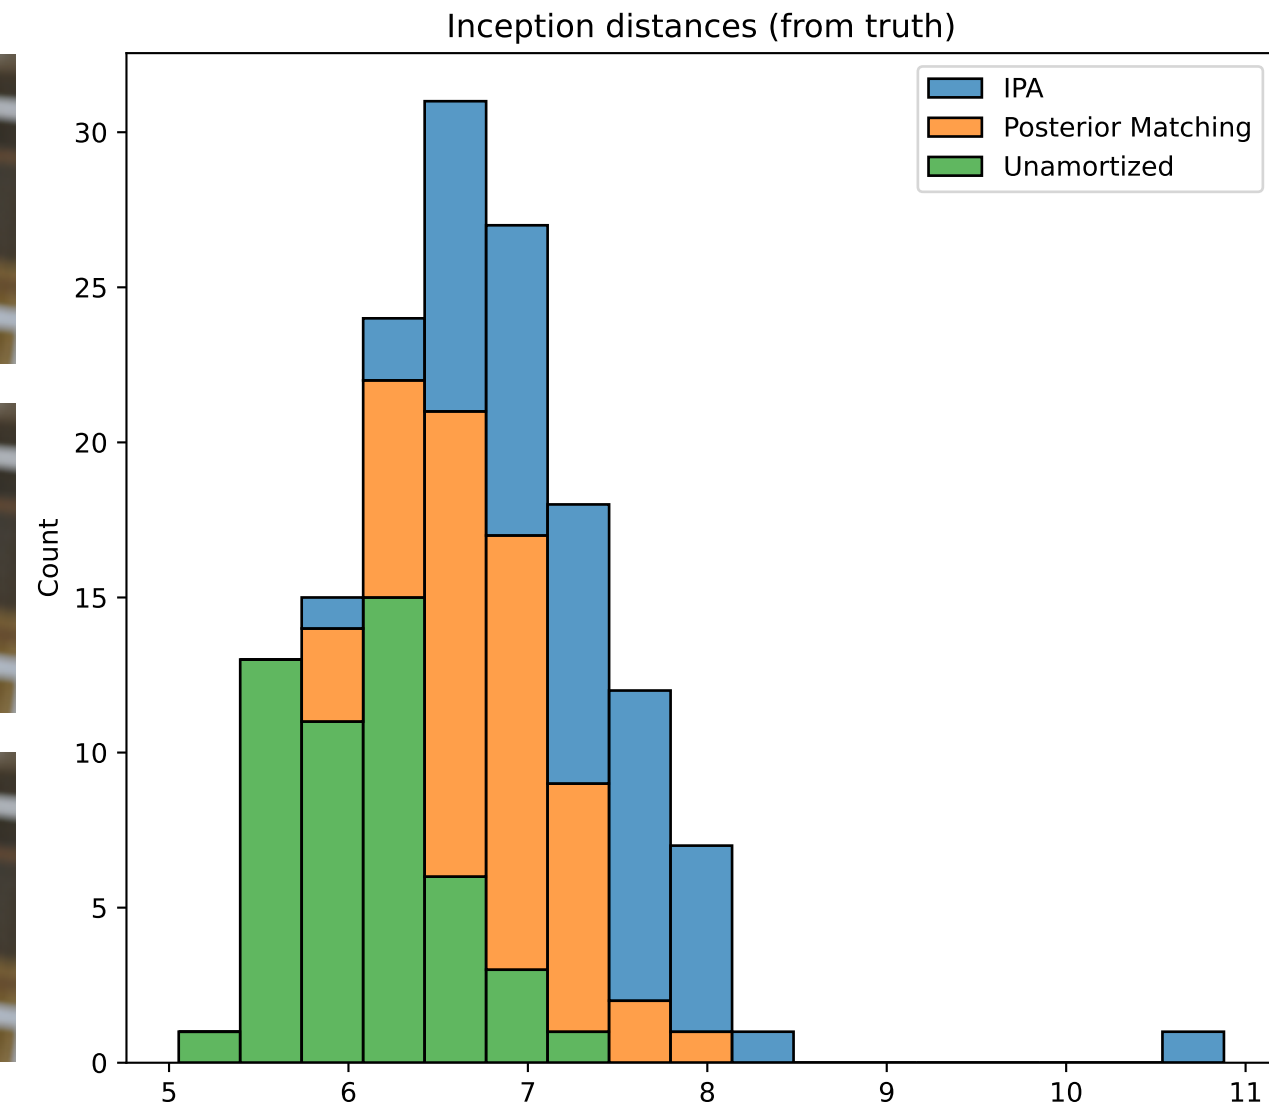

Supplement: supplementary_material [file attachment]

Truth

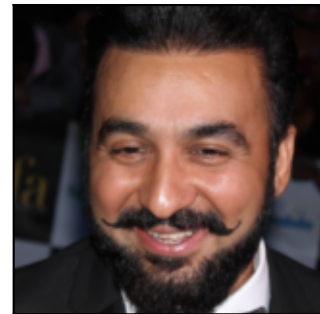

Unamortized

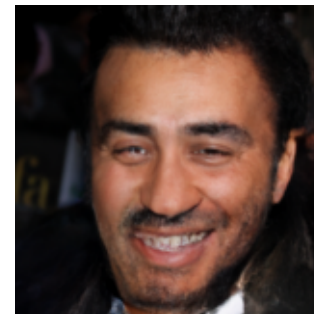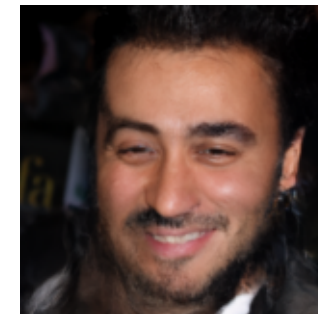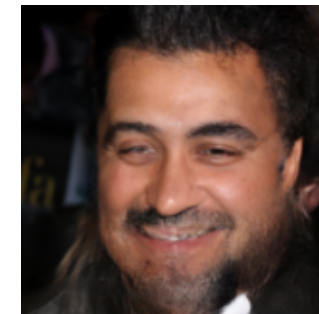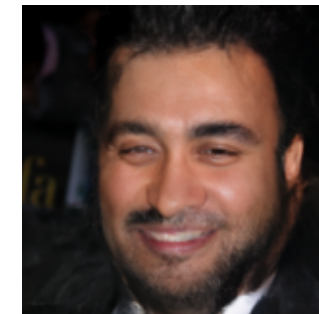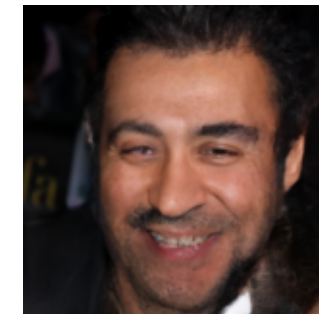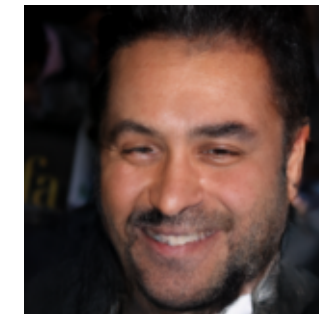

Masked

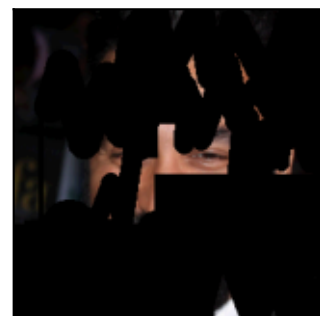

Posterior-Matching

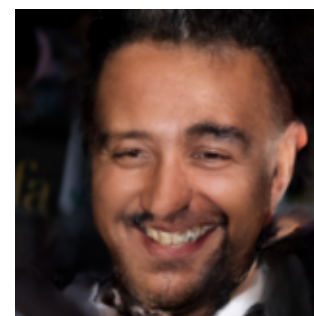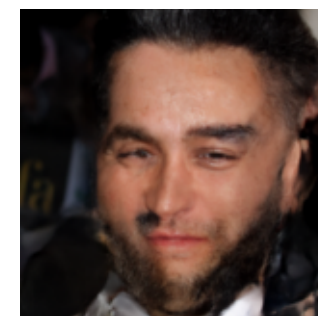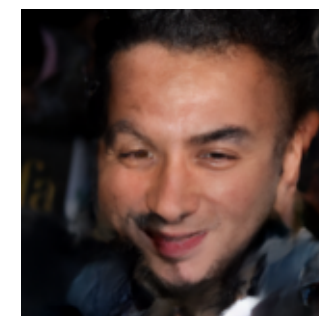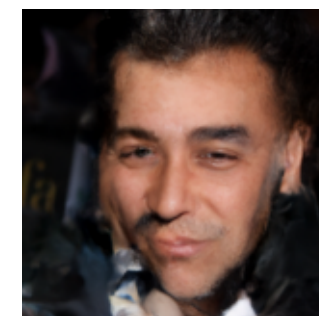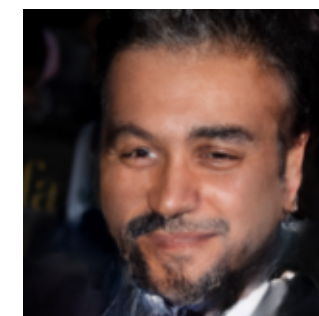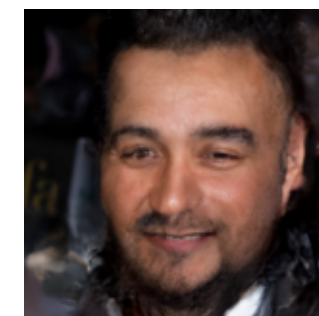

Mask

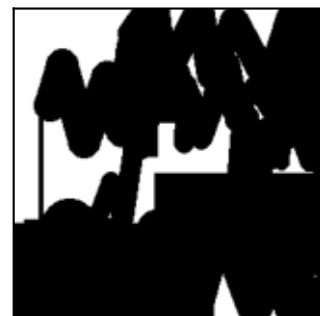

IPA

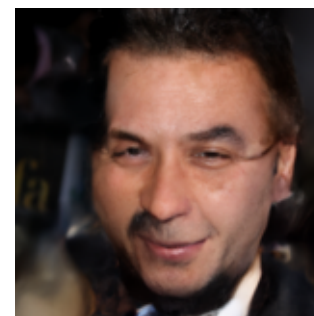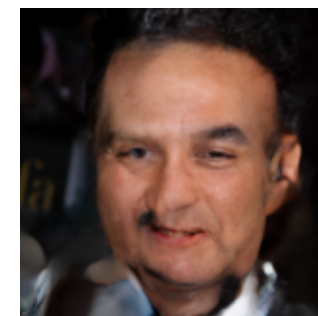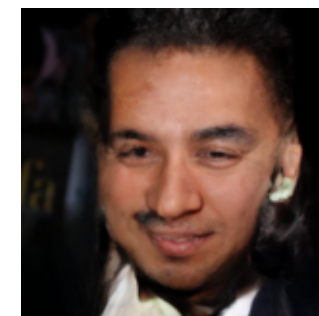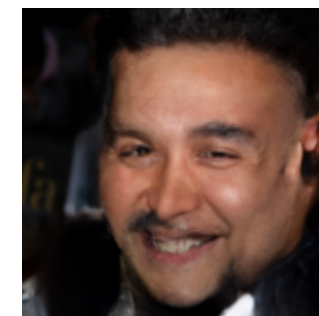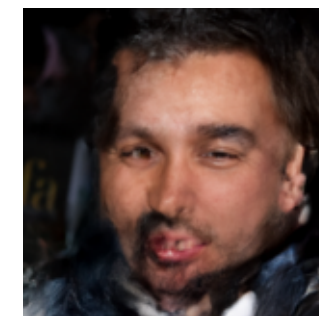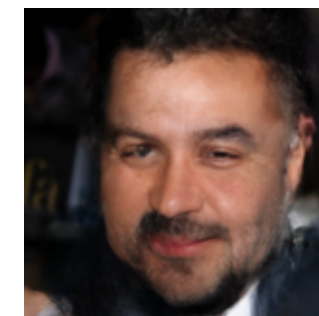

Inception distances (from truth)

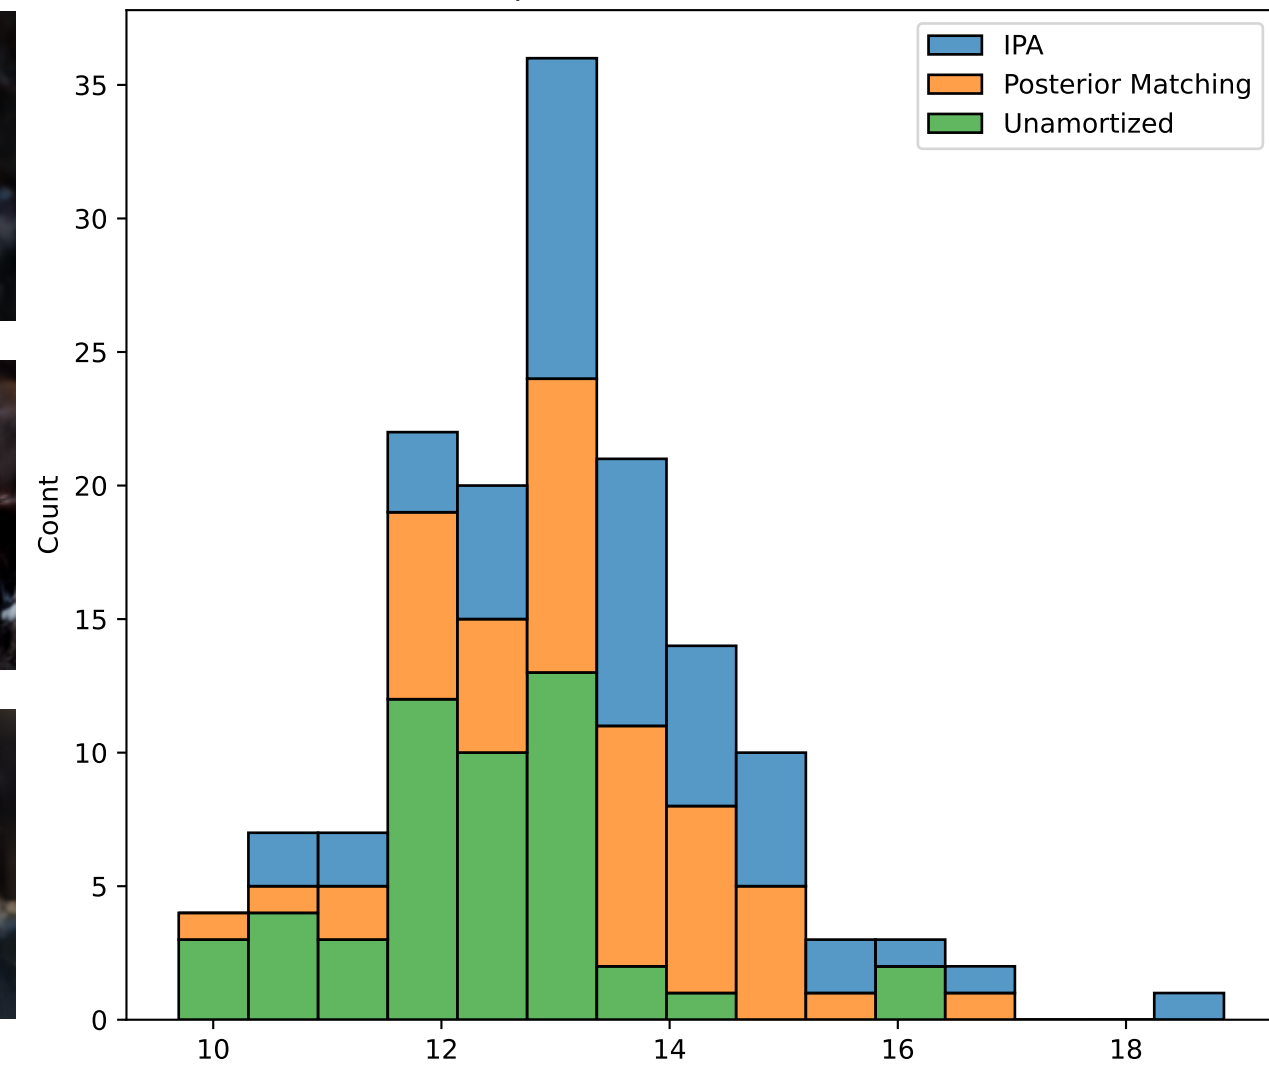

Supplement: supplementary_material [file attachment]

Truth

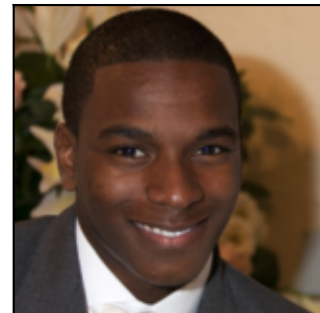

Unamortized

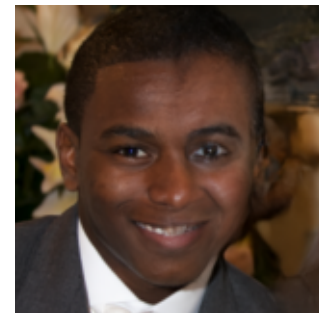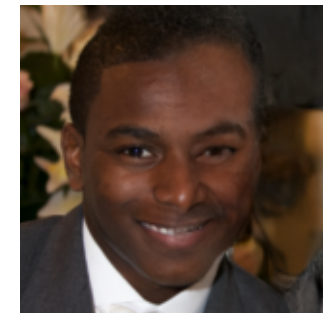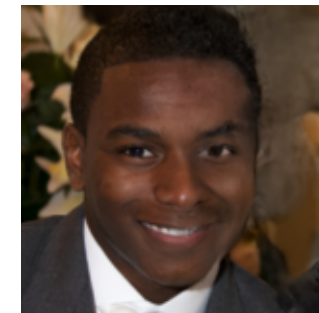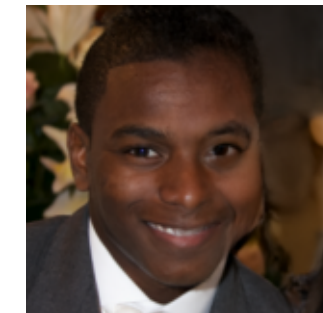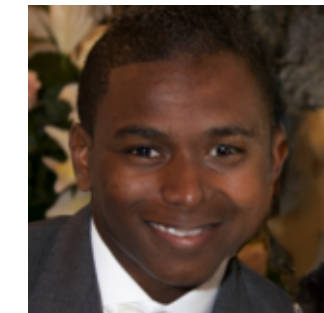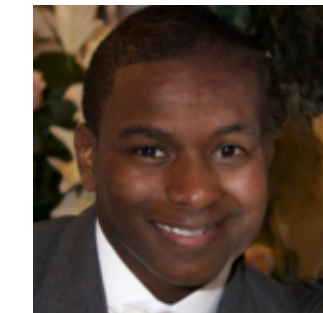

Masked

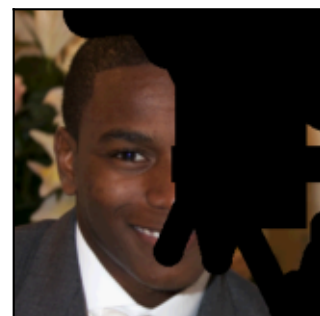

Posterior-Matching

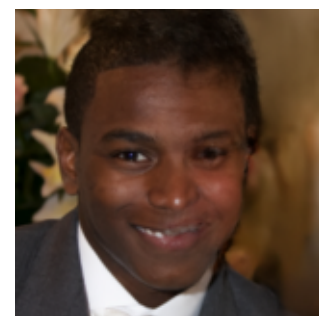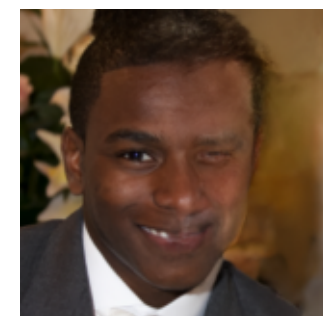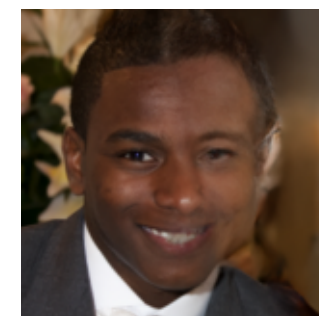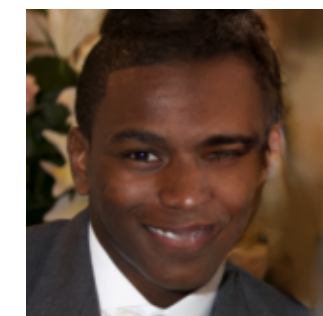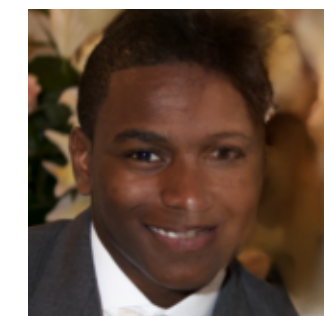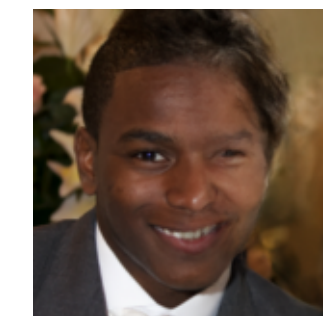

Mask

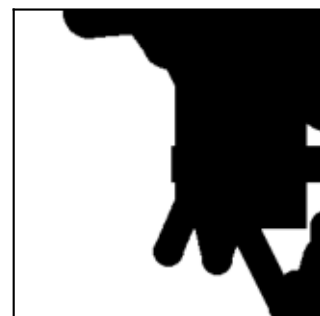

IPA

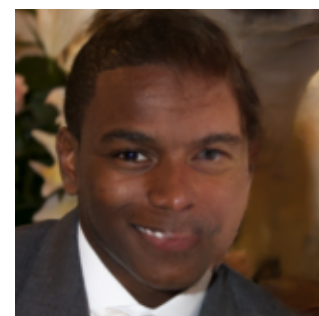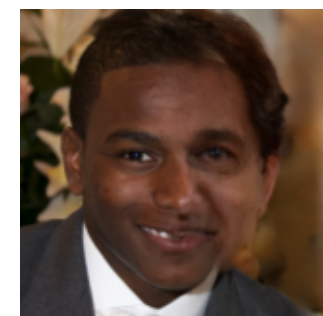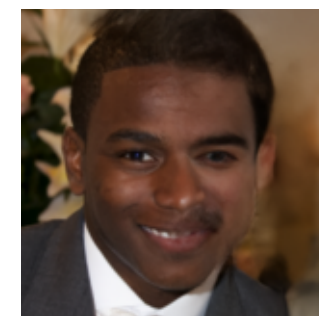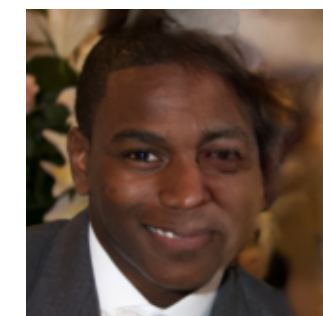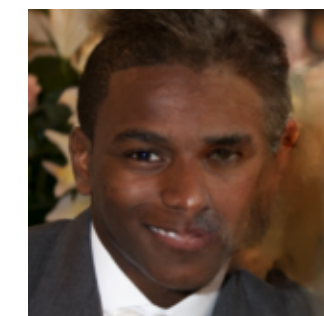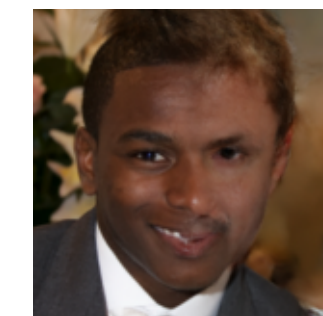

Inception distances (from truth)

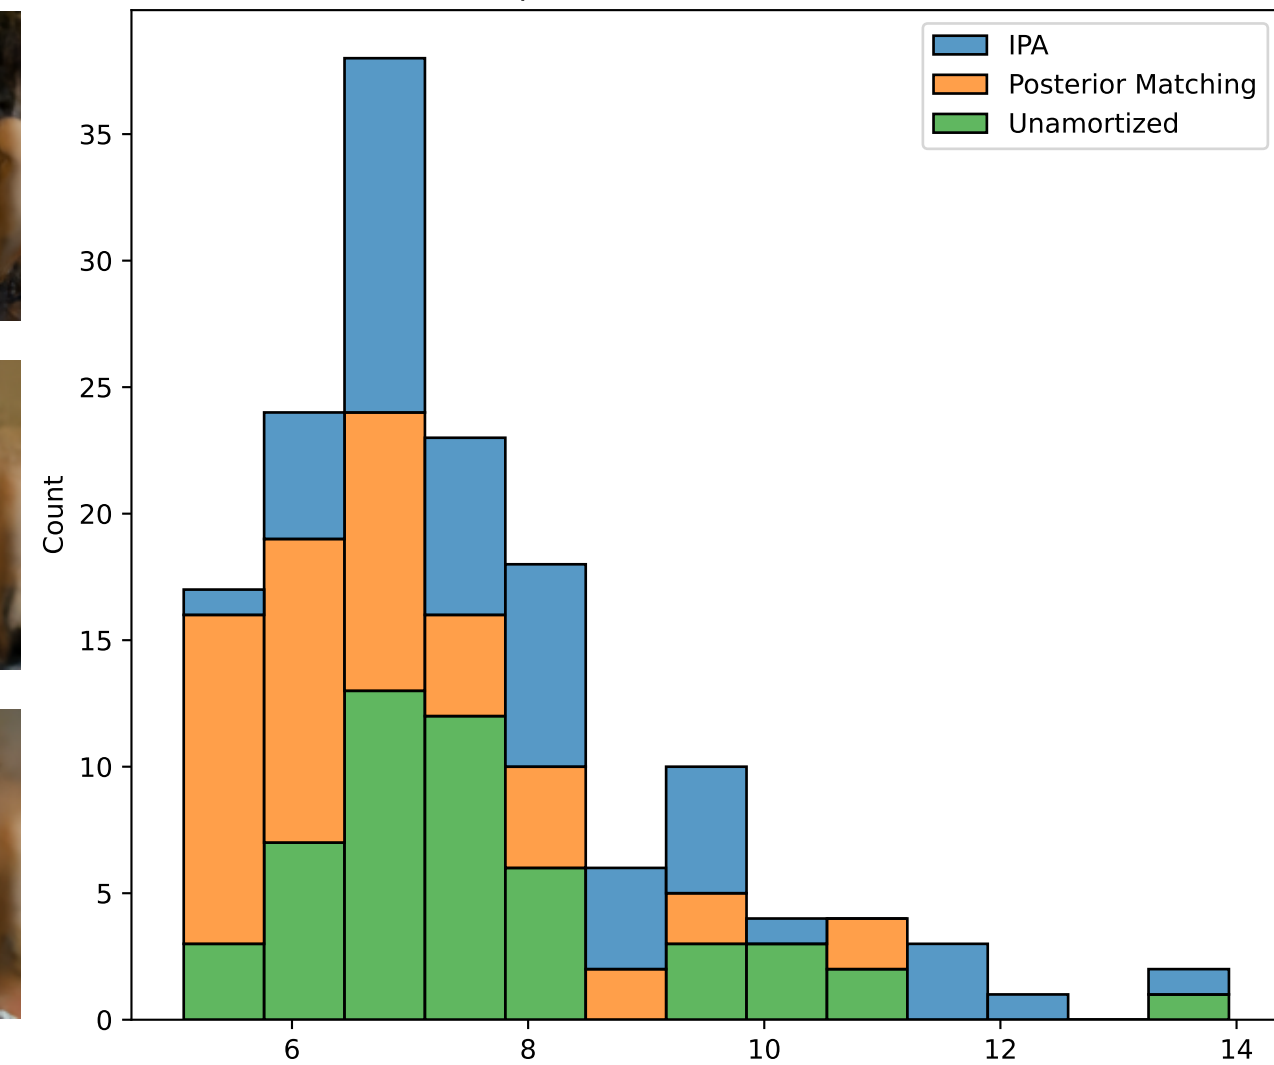

Supplement: supplementary_material [file attachment]

Truth

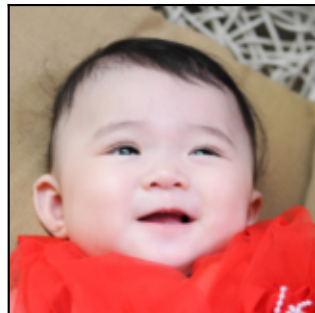

Unamortized

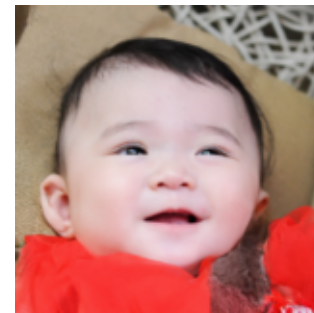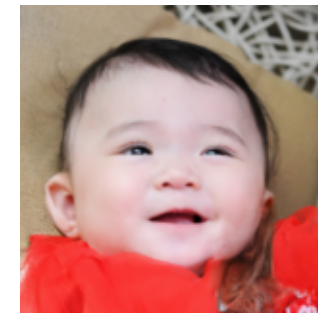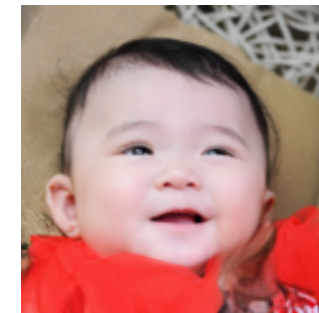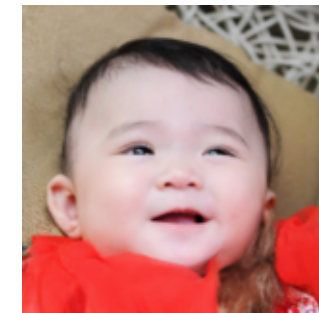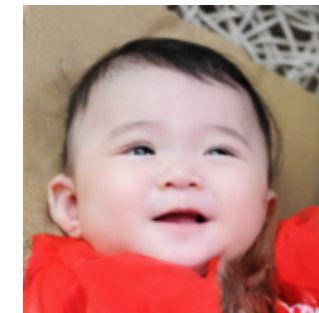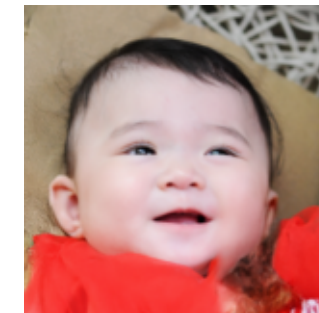

Masked

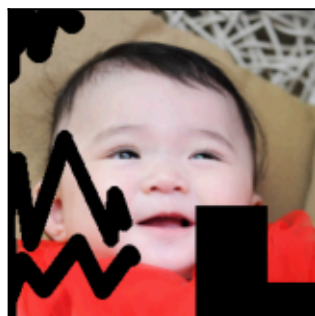

Posterior-Matching

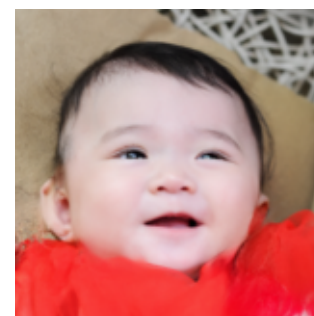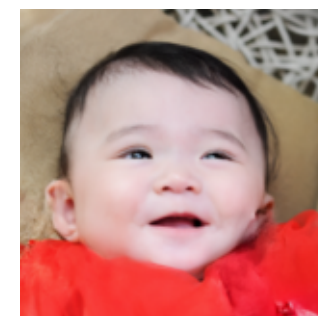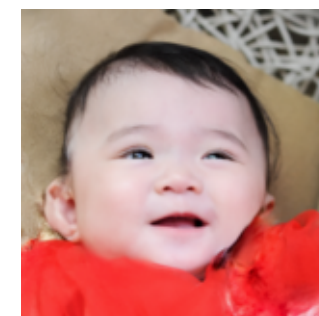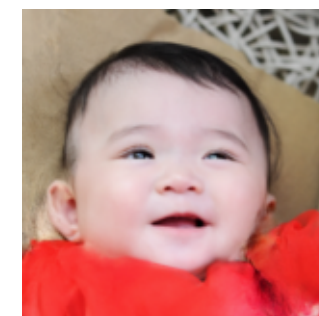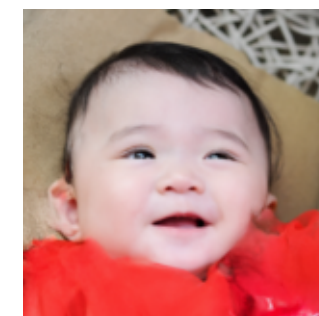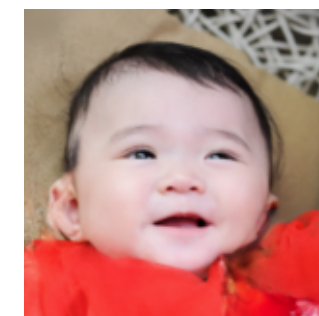

Mask

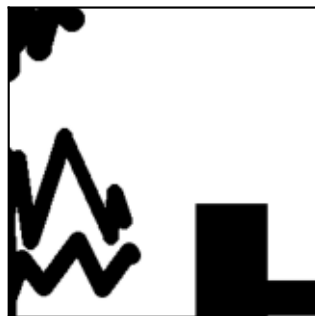

IPA

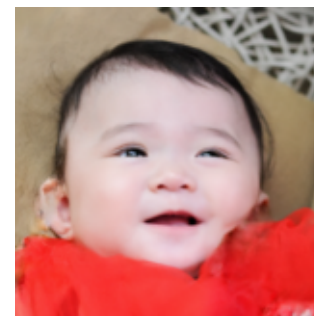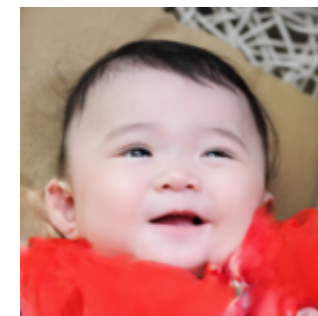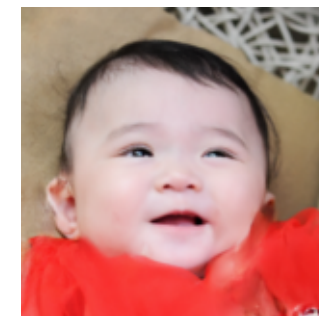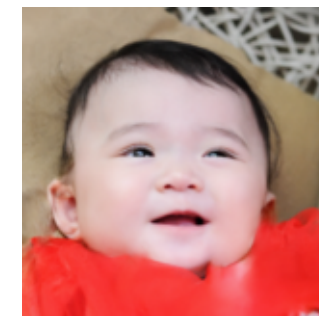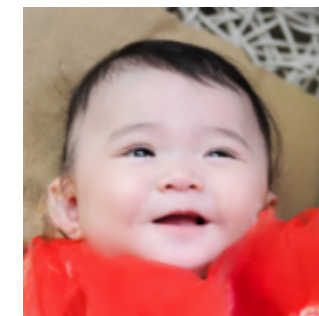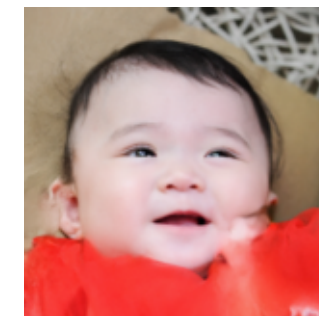

Inception distances (from truth)

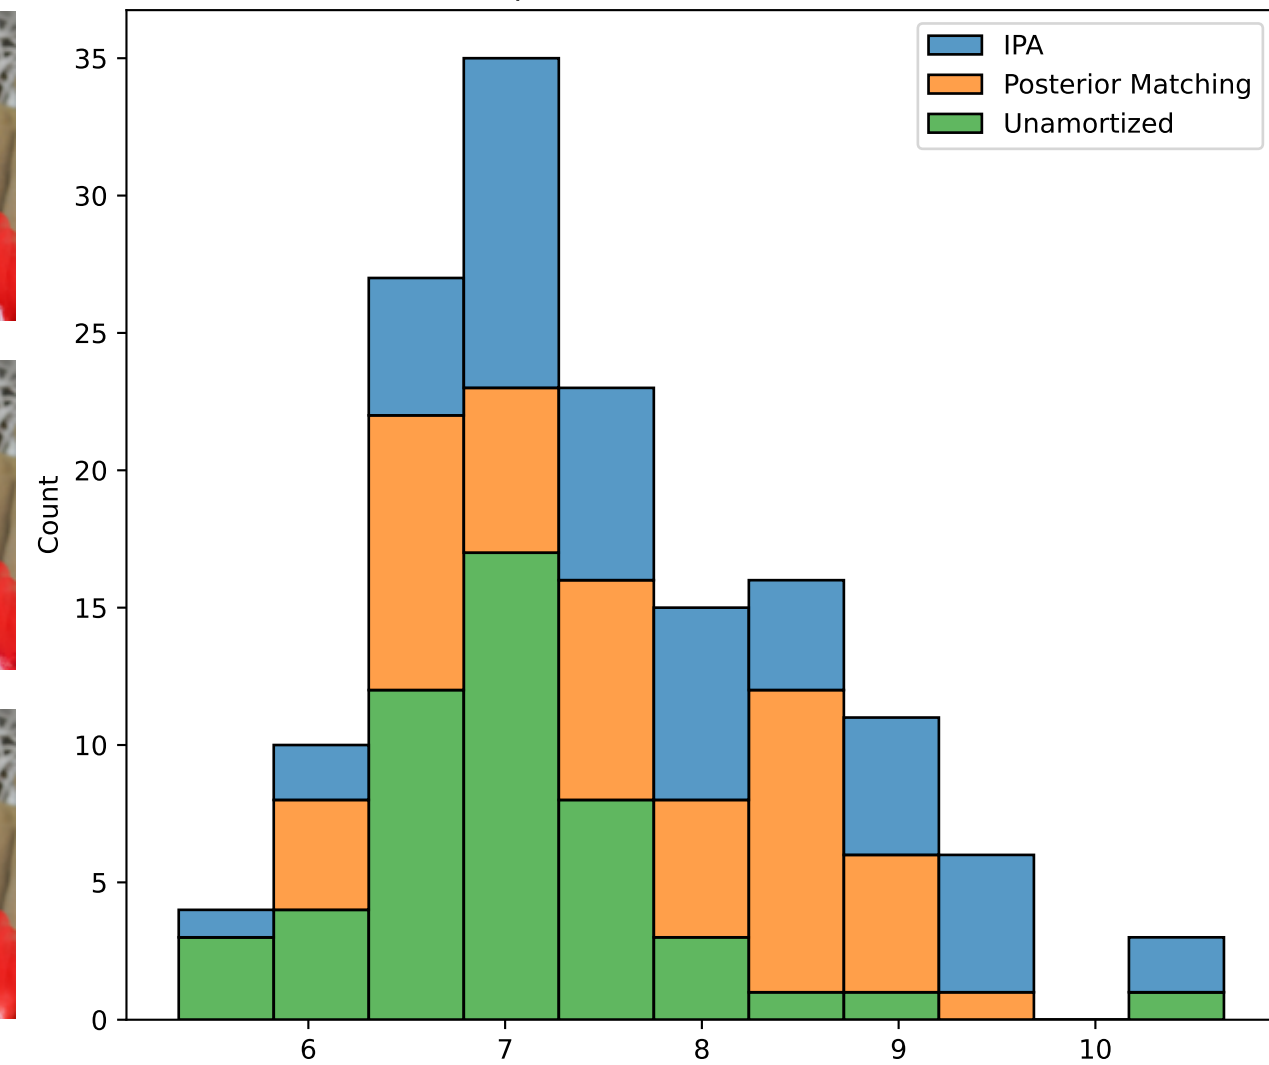

Supplement: supplementary_material [file attachment]

Truth

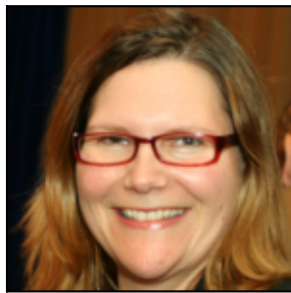

QAVI  
(Full model)

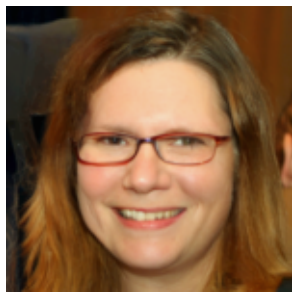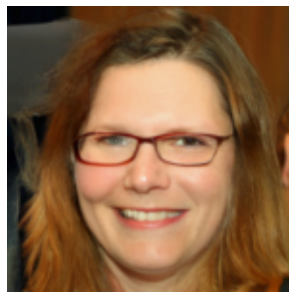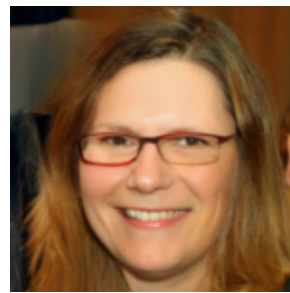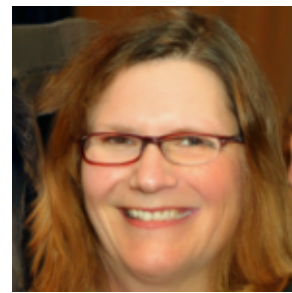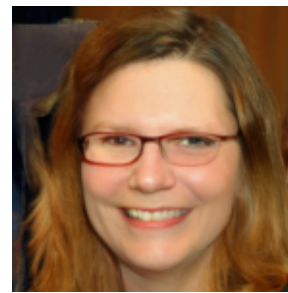

Masked

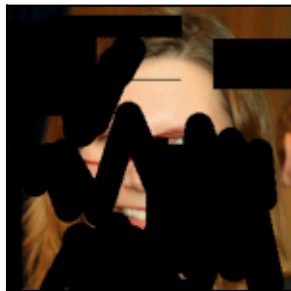

QAVI

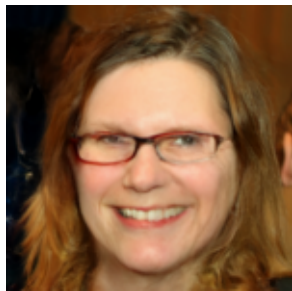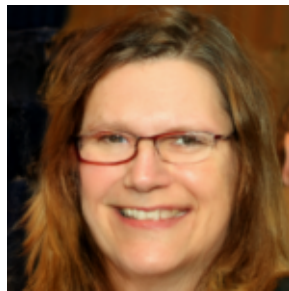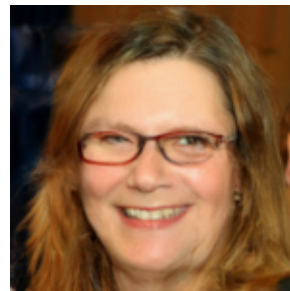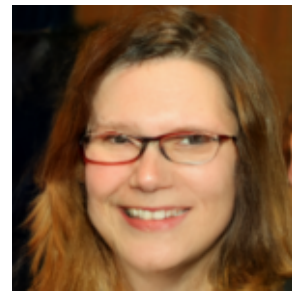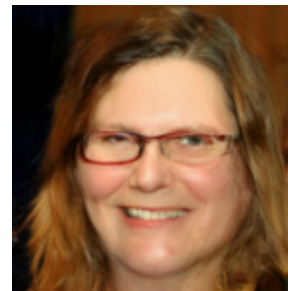

Mask

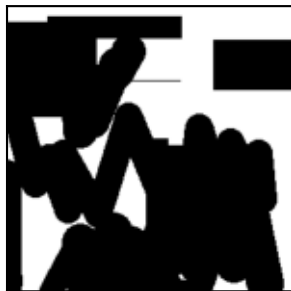

Posterior-  
Matching

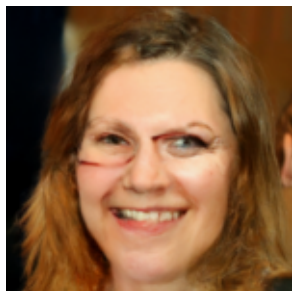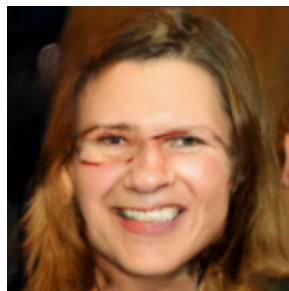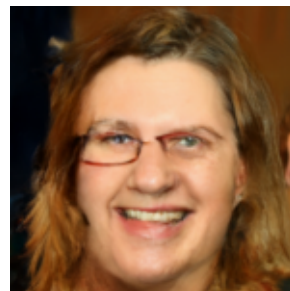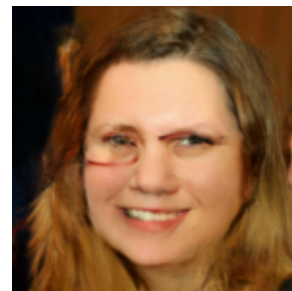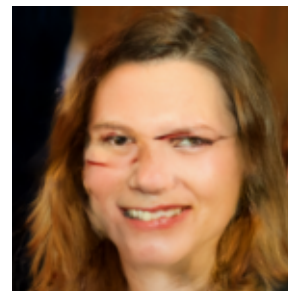

VAEAC

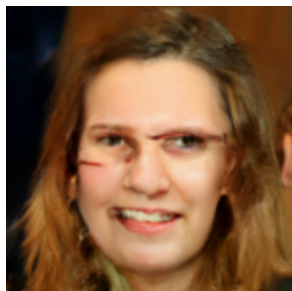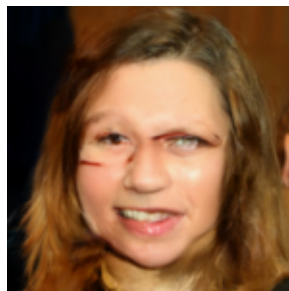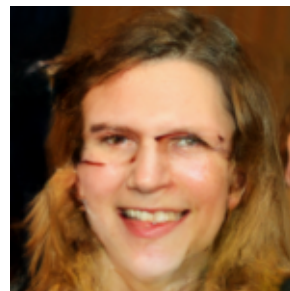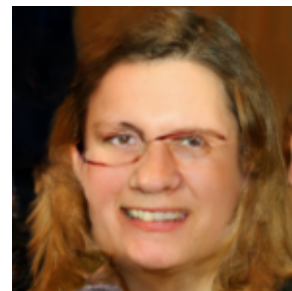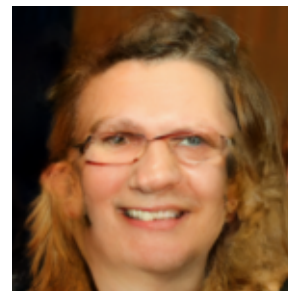

Supplement: supplementary_material [file attachment]

# QAVI vs Posterior-Match

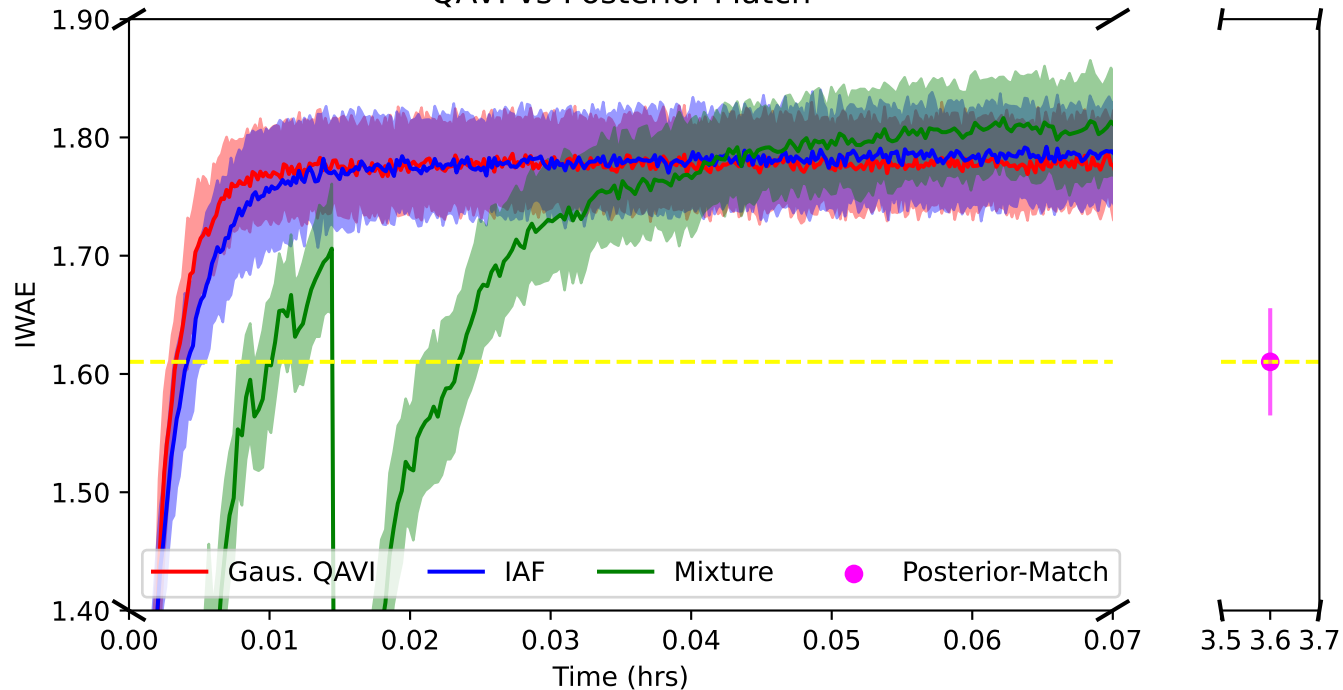

Supplement: supplementary_material [file attachment]

Truth

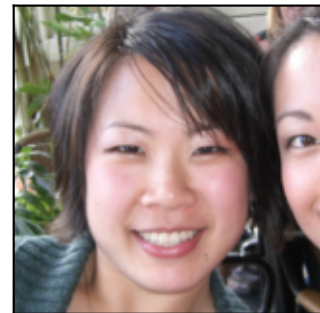

Unamortized

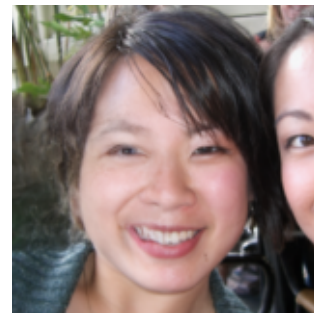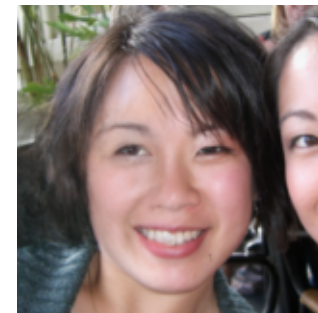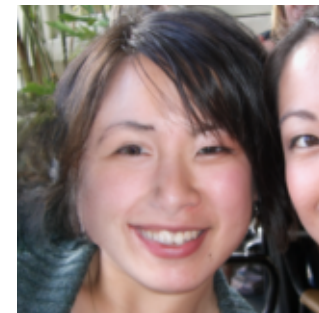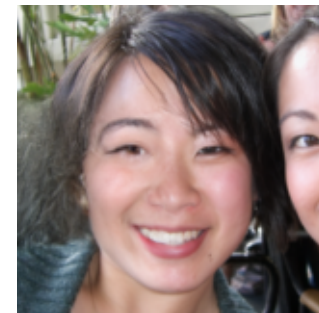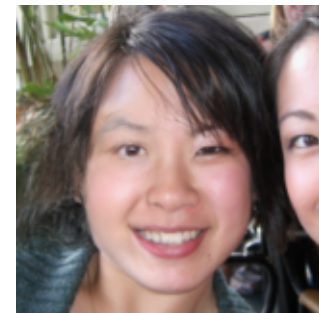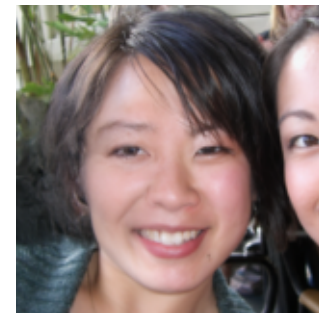

Masked

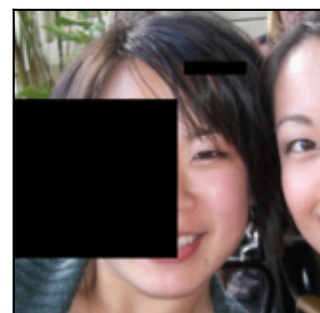

Posterior-Matching

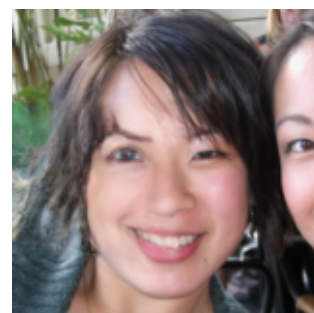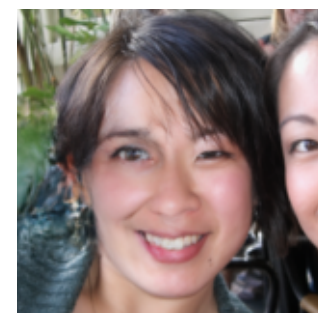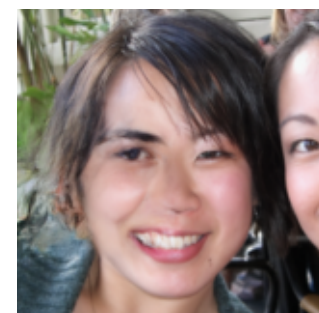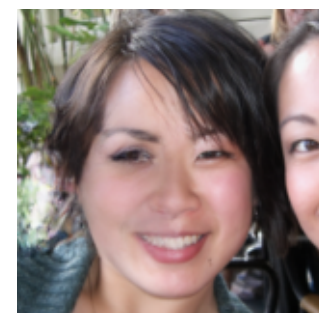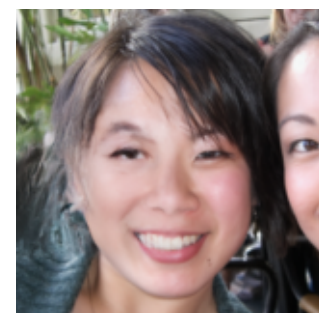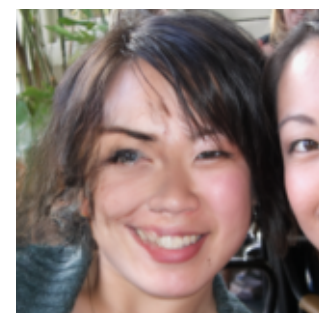

Mask

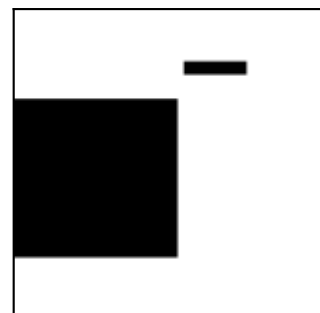

IPA

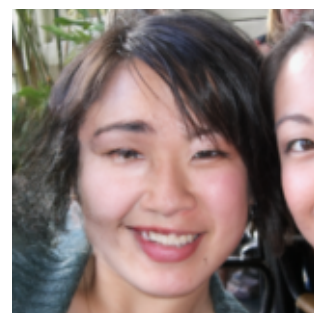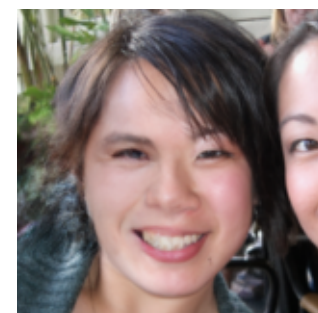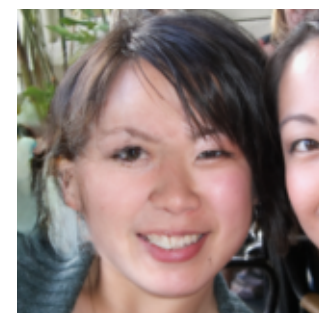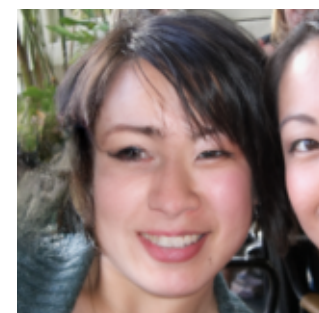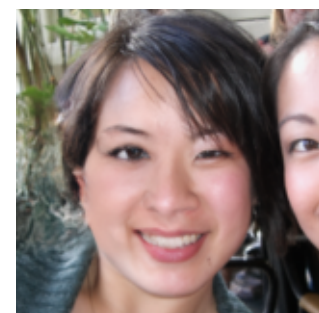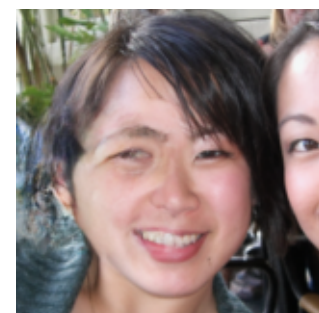

Inception distances (from truth)

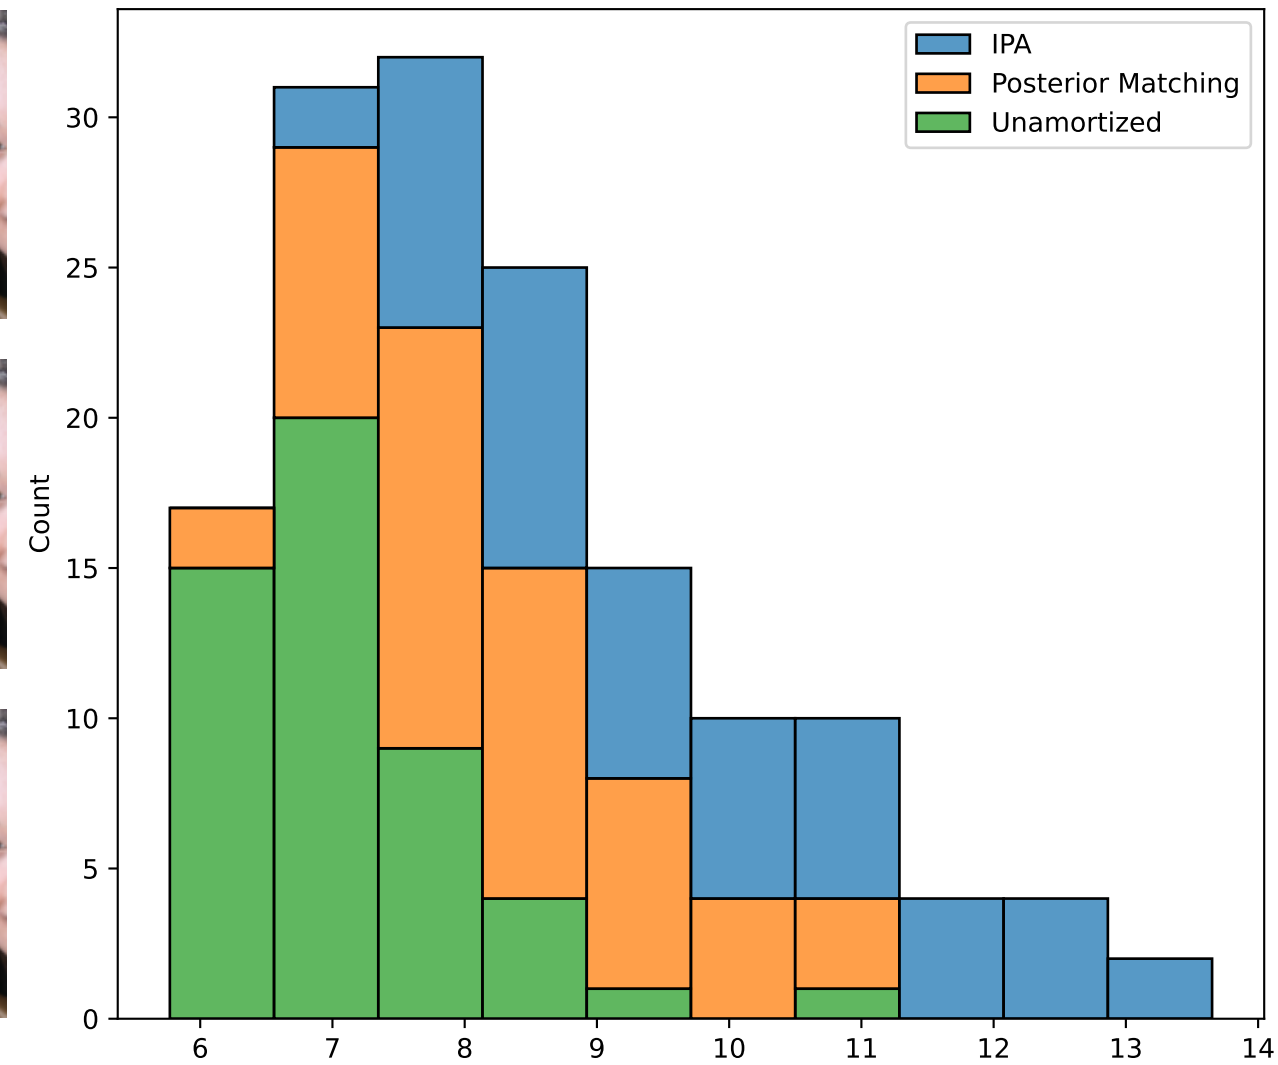

Supplement: supplementary_material [file attachment]

Truth

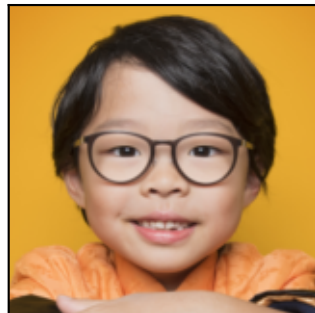

Unamortized

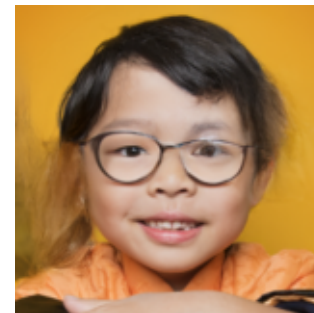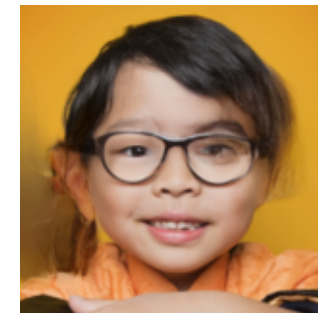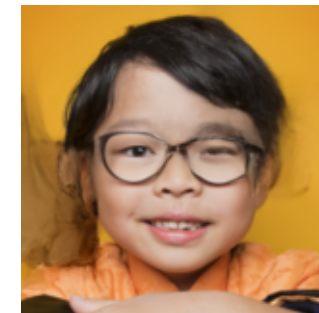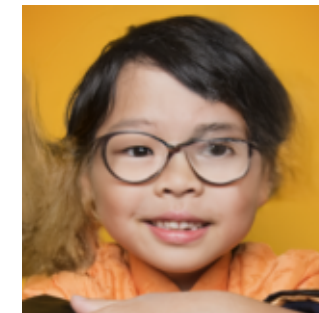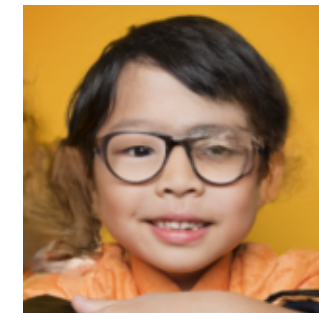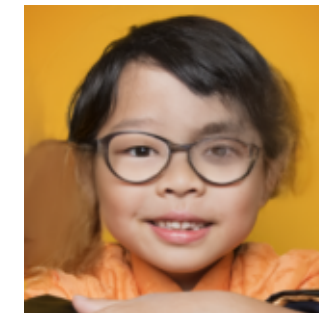

Masked

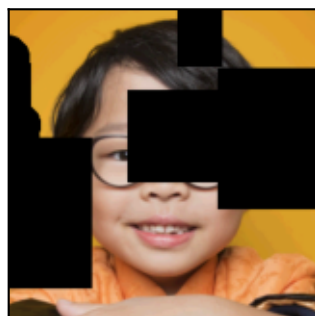

Posterior-Matching

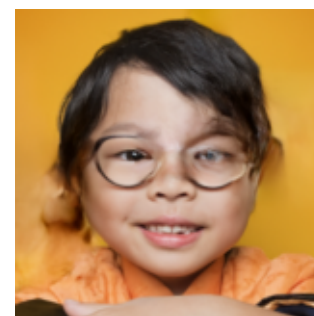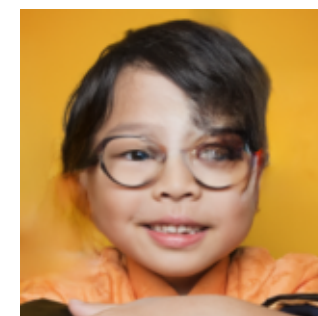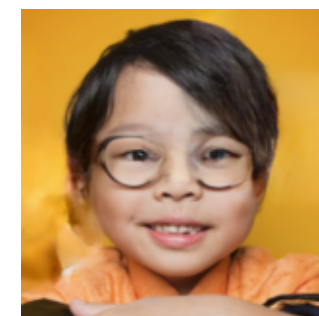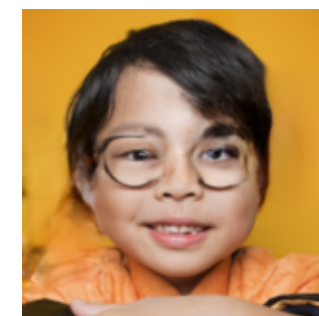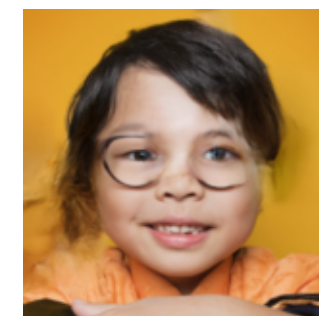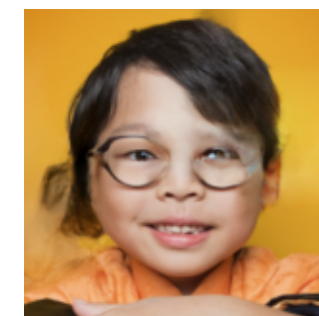

Mask

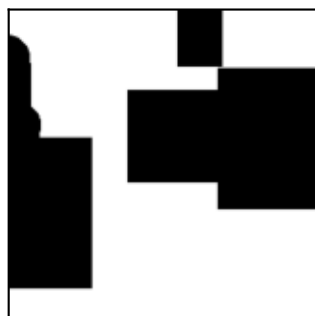

IPA

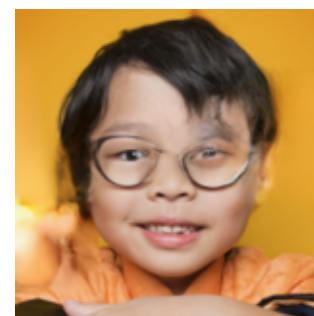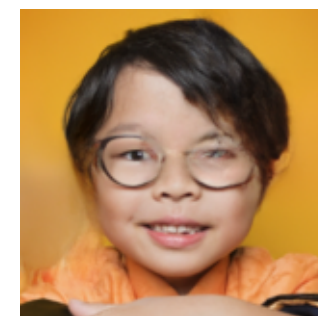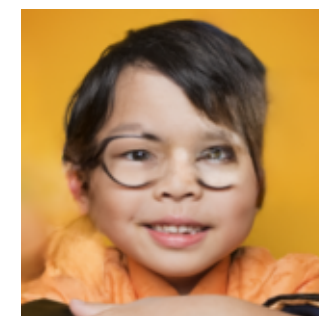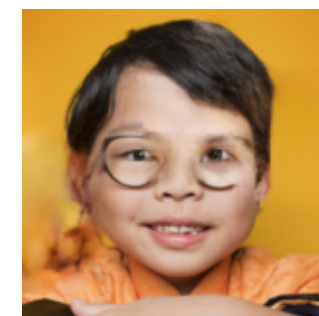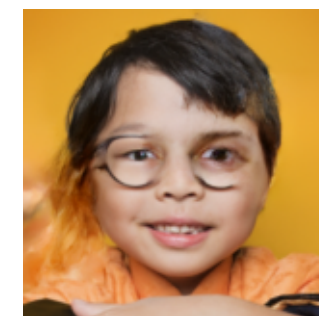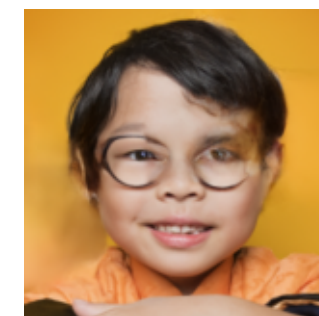

Inception distances (from truth)

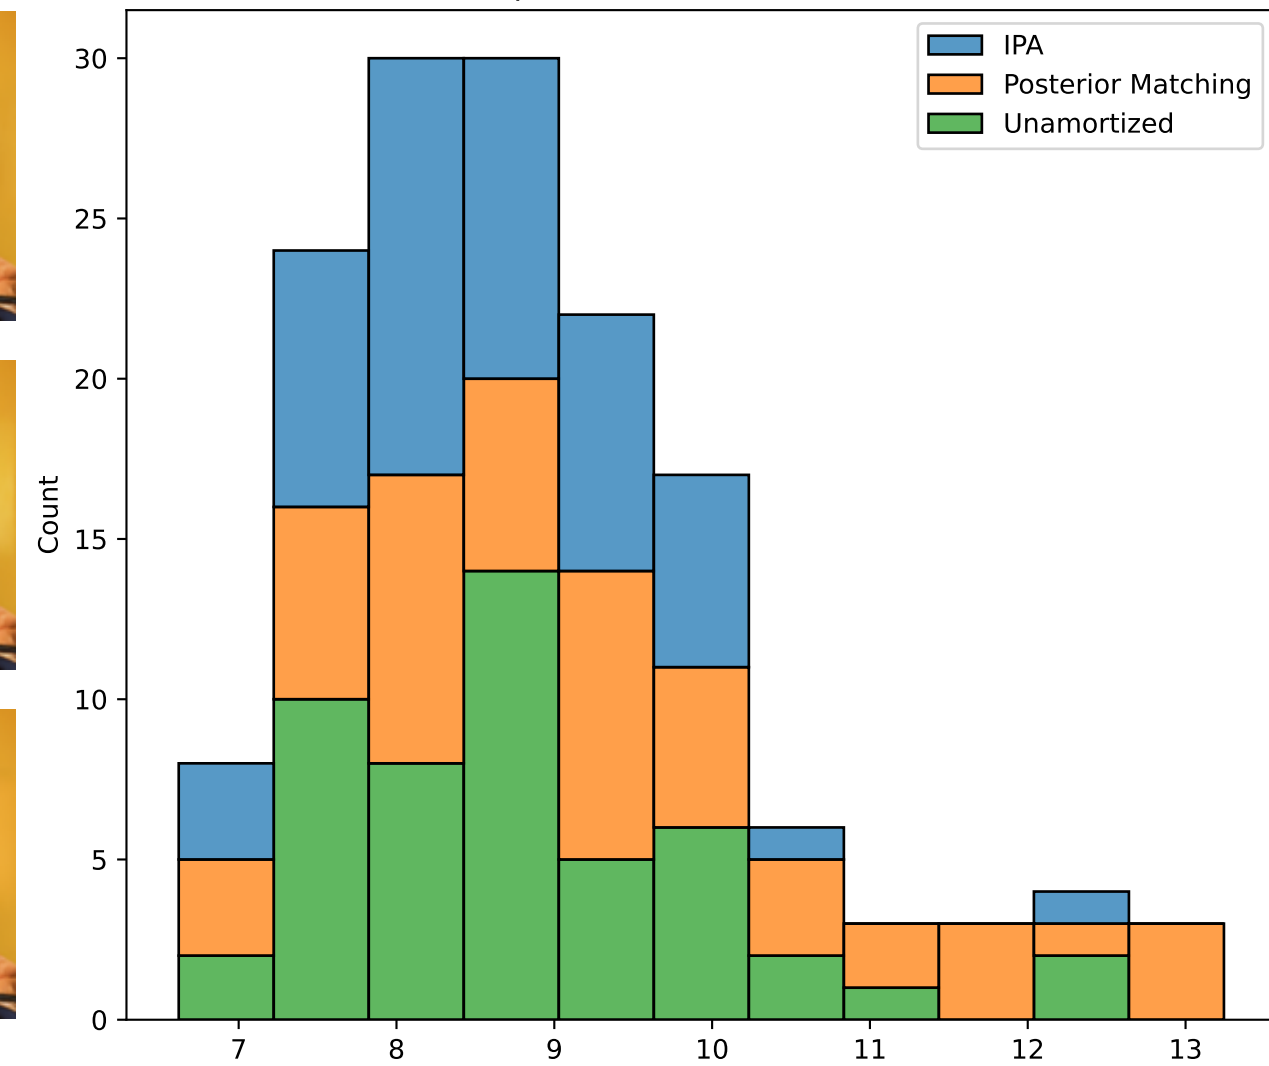

Supplement: supplementary_material [file attachment]

Truth

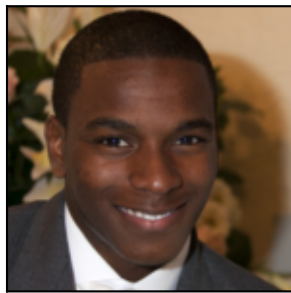

QAVI  
(Full model)

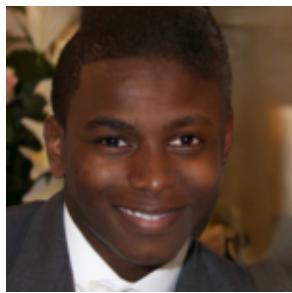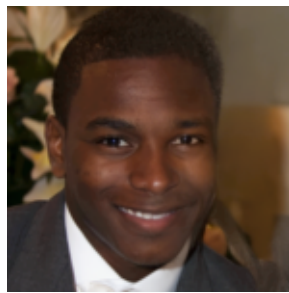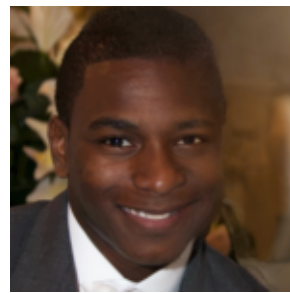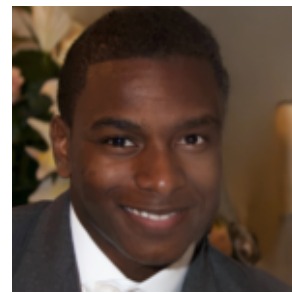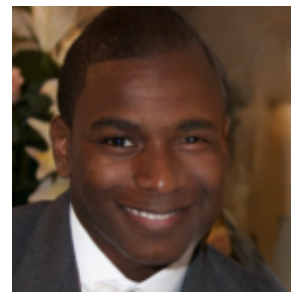

Masked

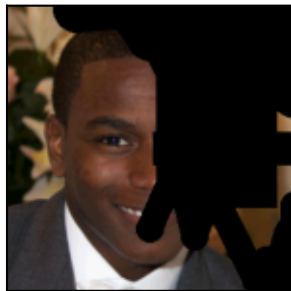

QAVI

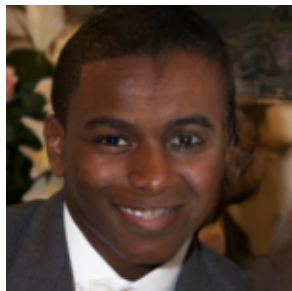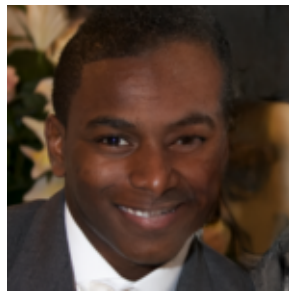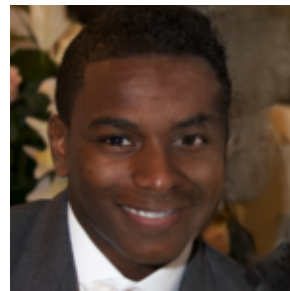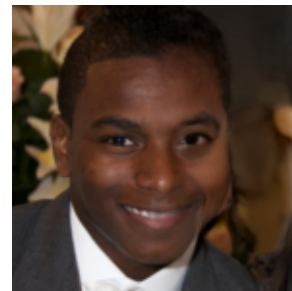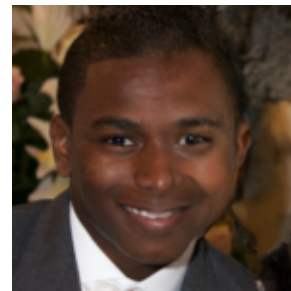

Mask

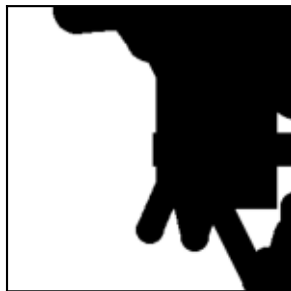

Posterior-  
Matching

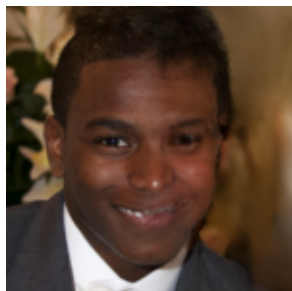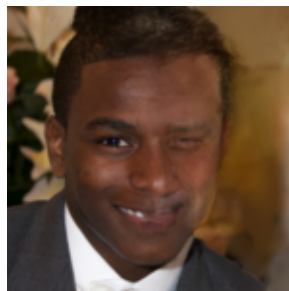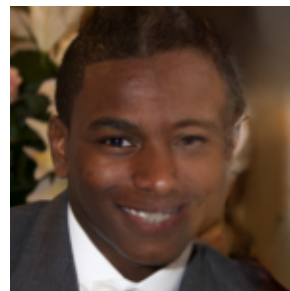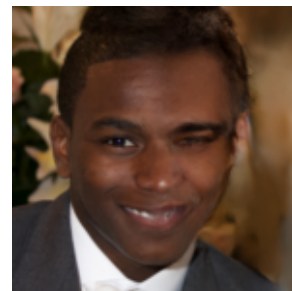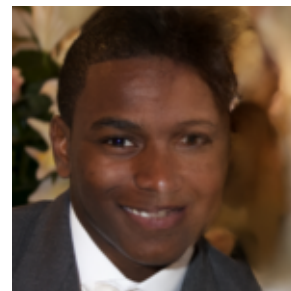

VAEAC

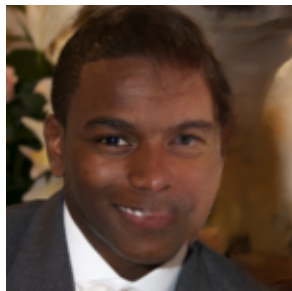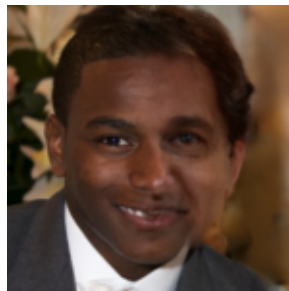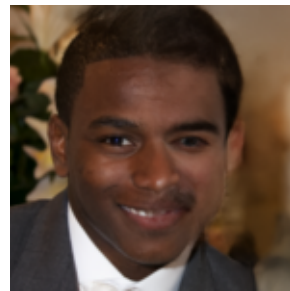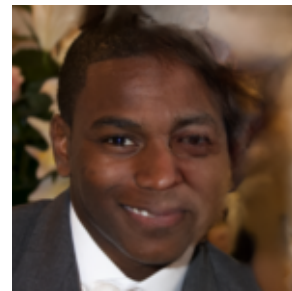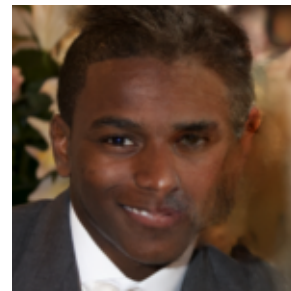

Supplement: supplementary_material [file attachment]

Truth

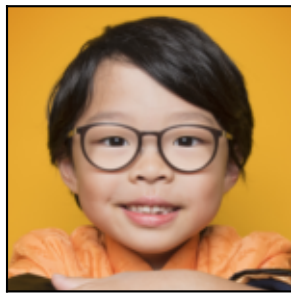

QAVI  
(Full model)

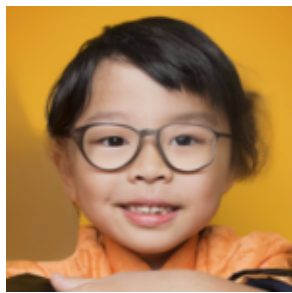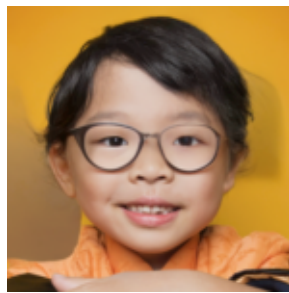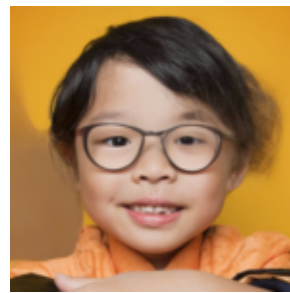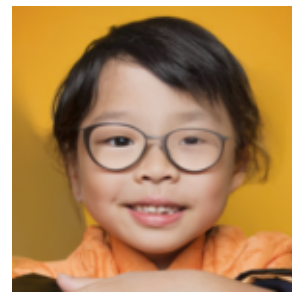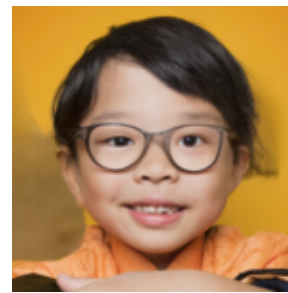

Masked

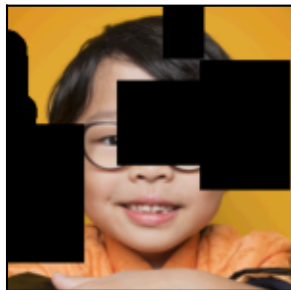

QAVI

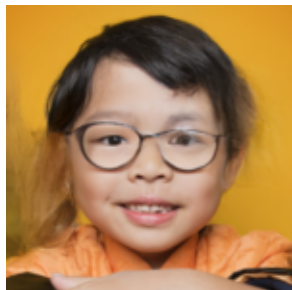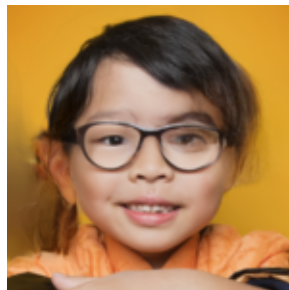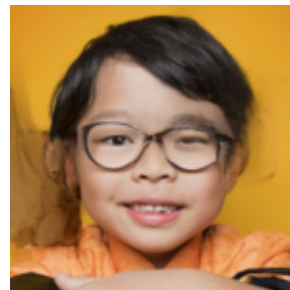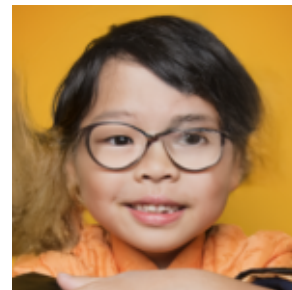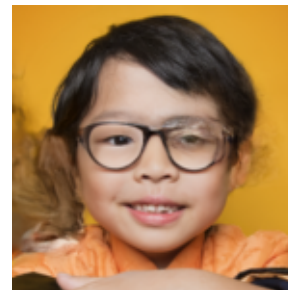

Mask

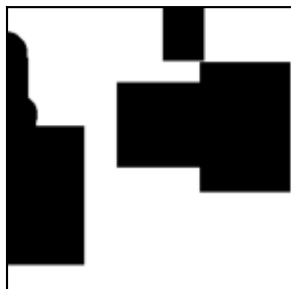

Posterior-  
Matching

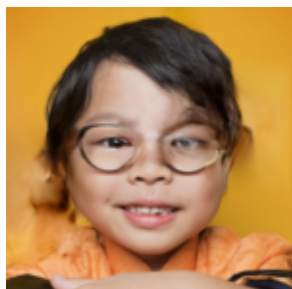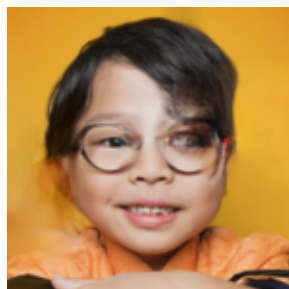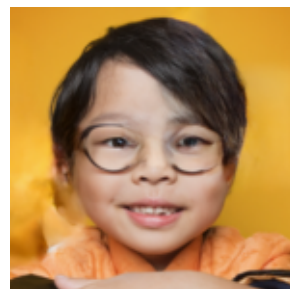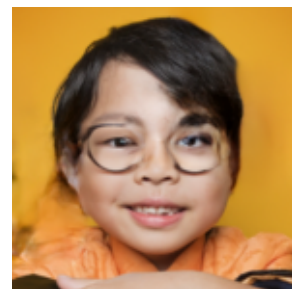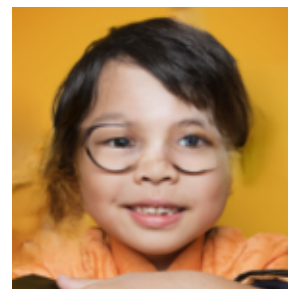

VAEAC

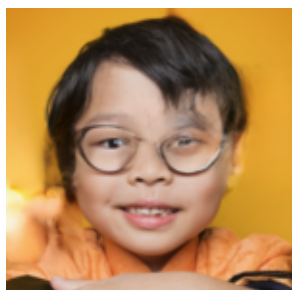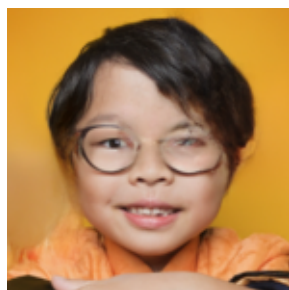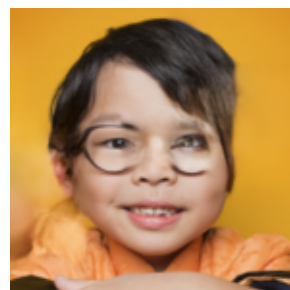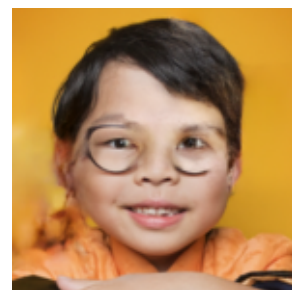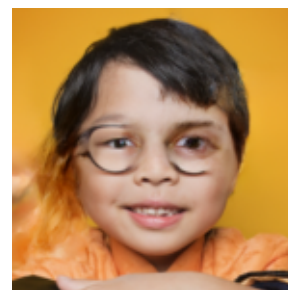

Supplement: supplementary_material [file attachment]

Truth

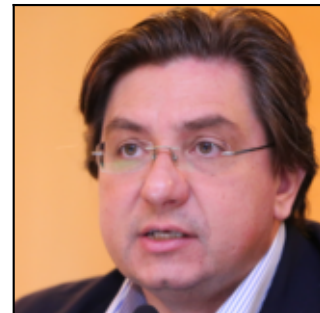

Unamortized

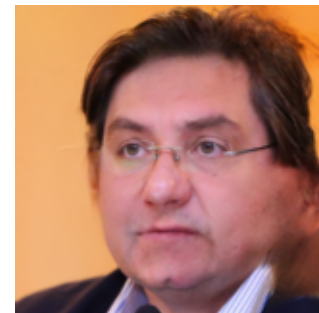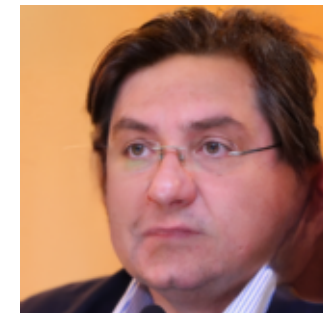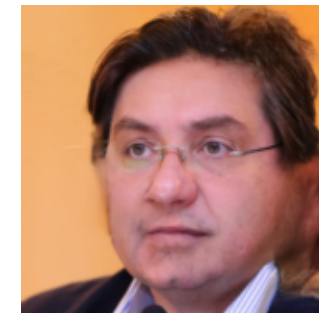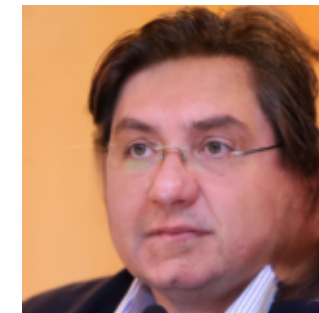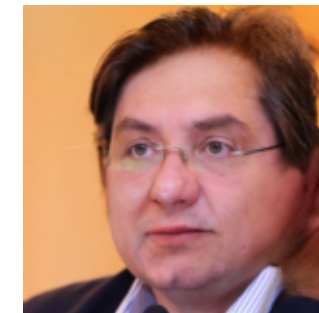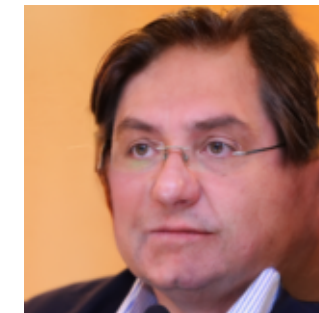

Masked

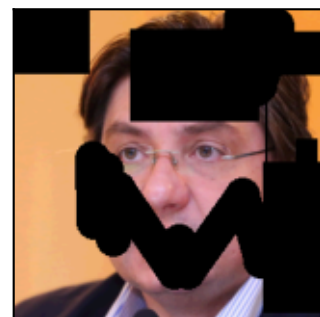

Posterior-Matching

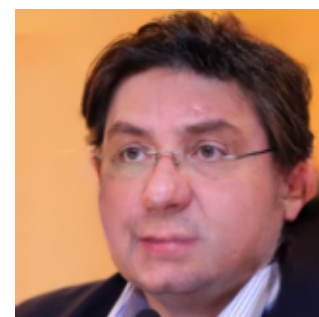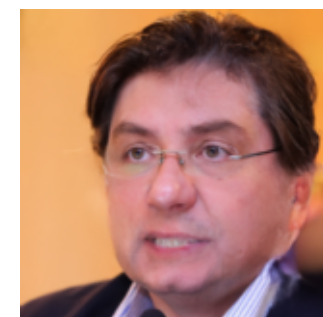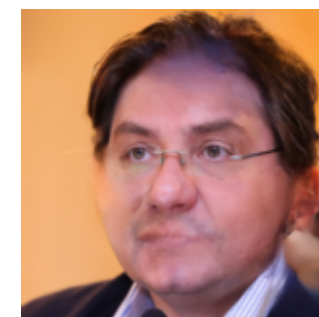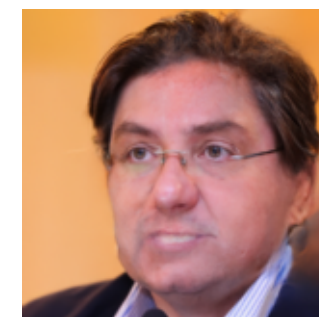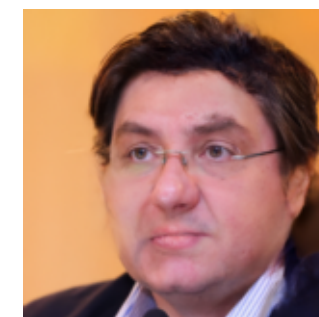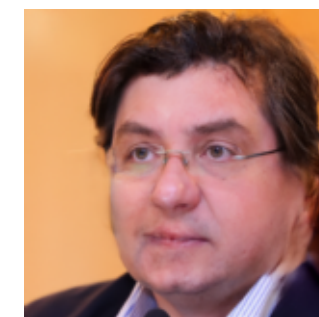

Mask

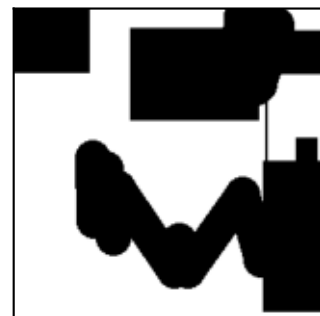

IPA

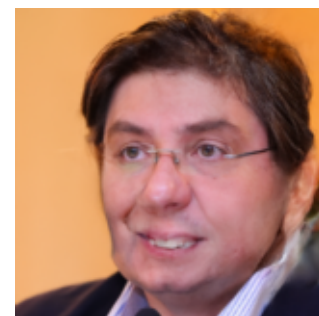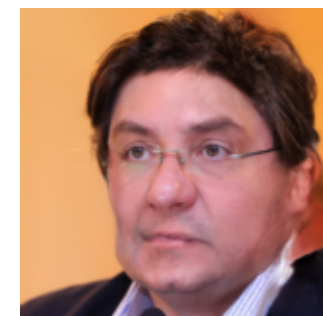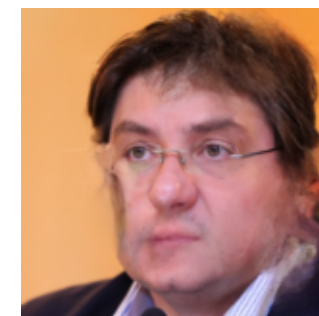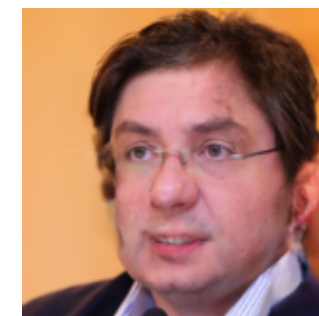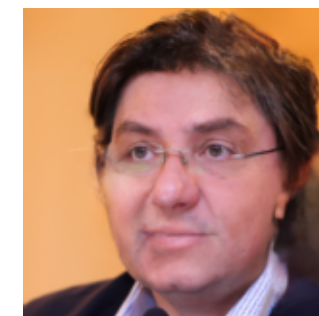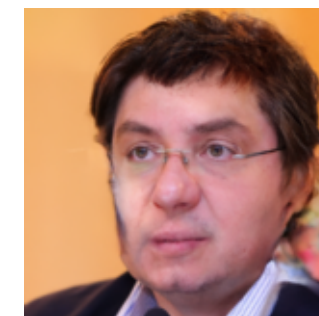

Inception distances (from truth)

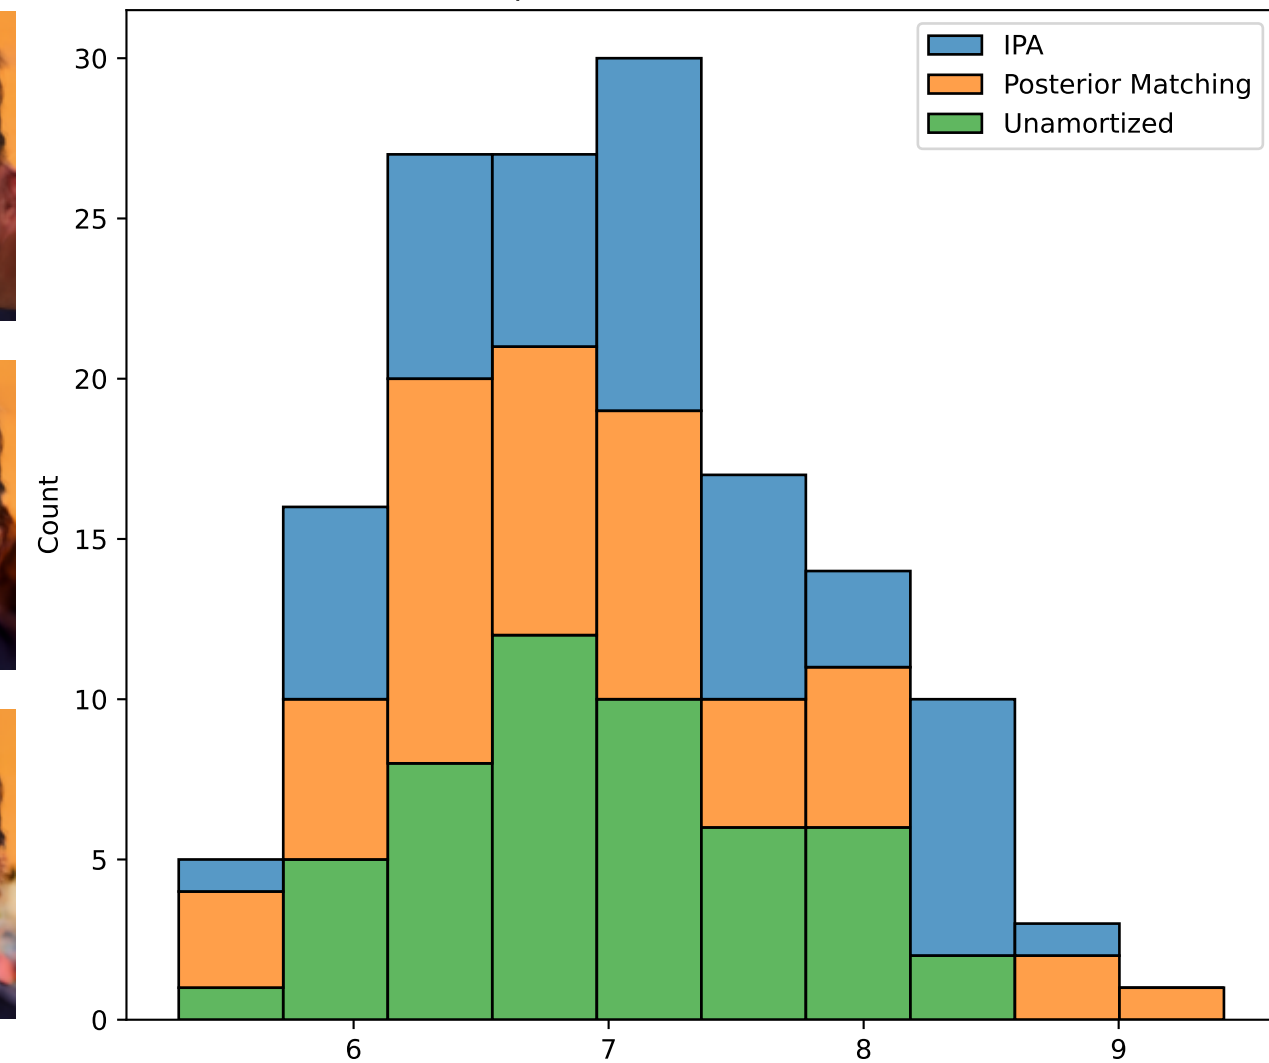

Supplement: supplementary_material [file attachment]

Truth

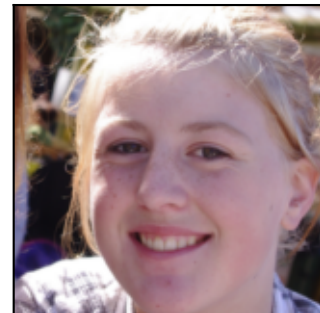

Unamortized

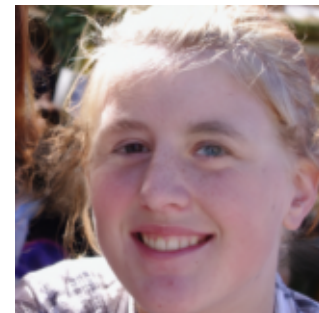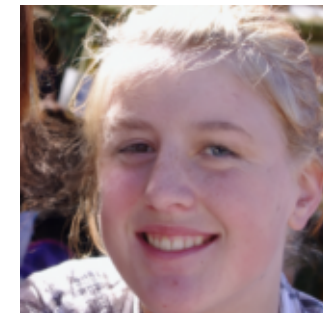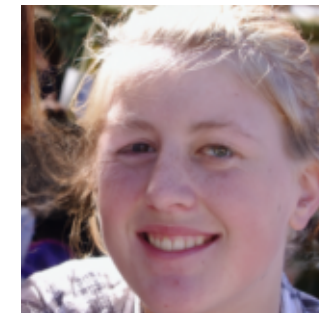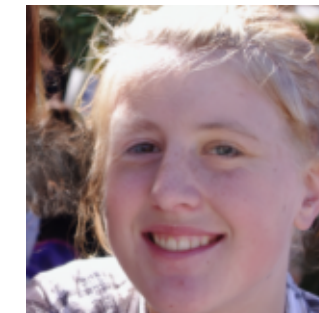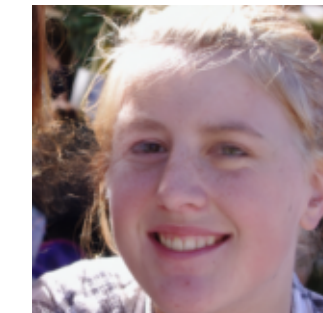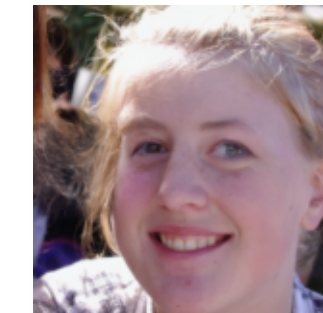

Masked

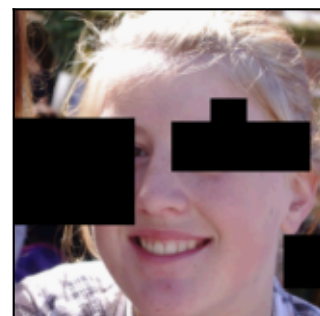

Posterior-Matching

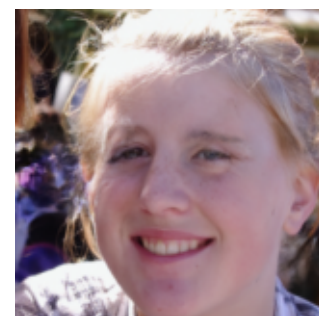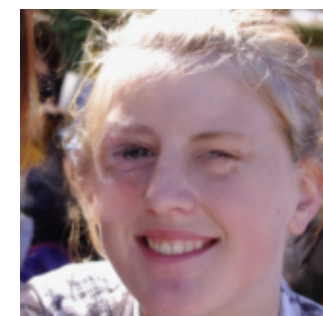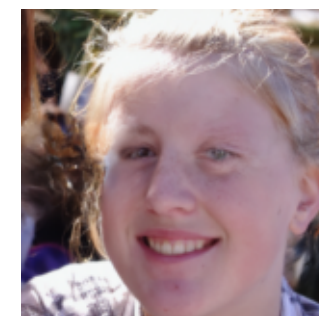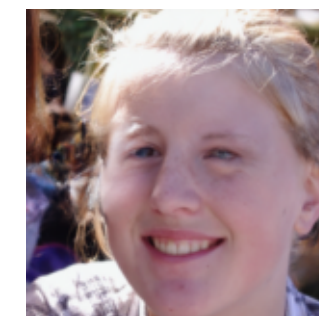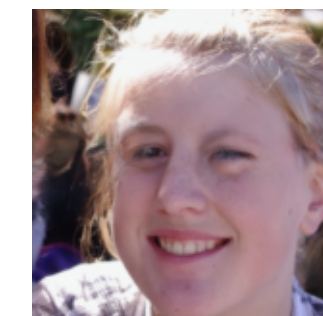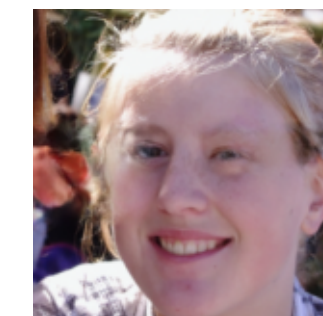

Mask

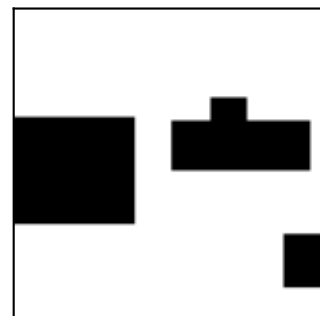

IPA

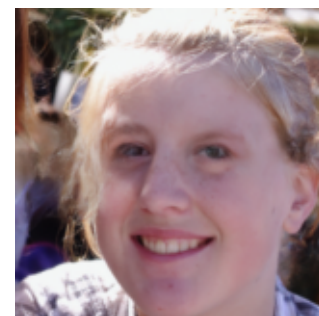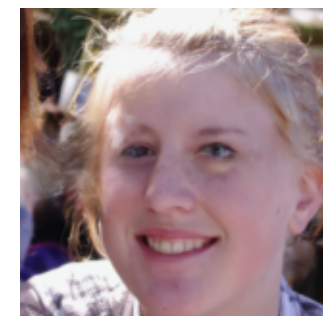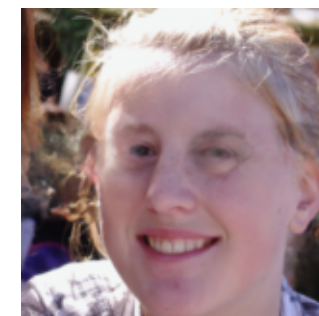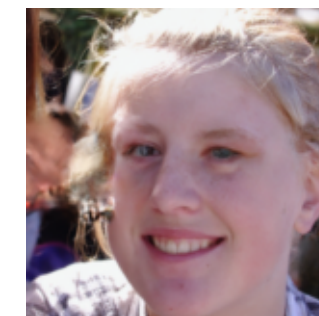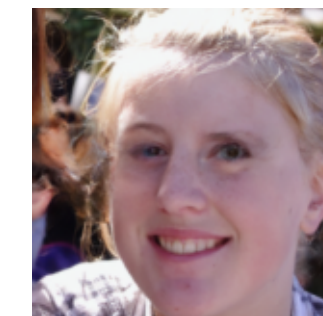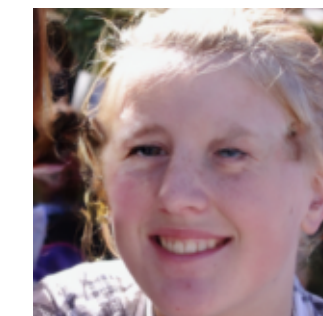

Inception distances (from truth)

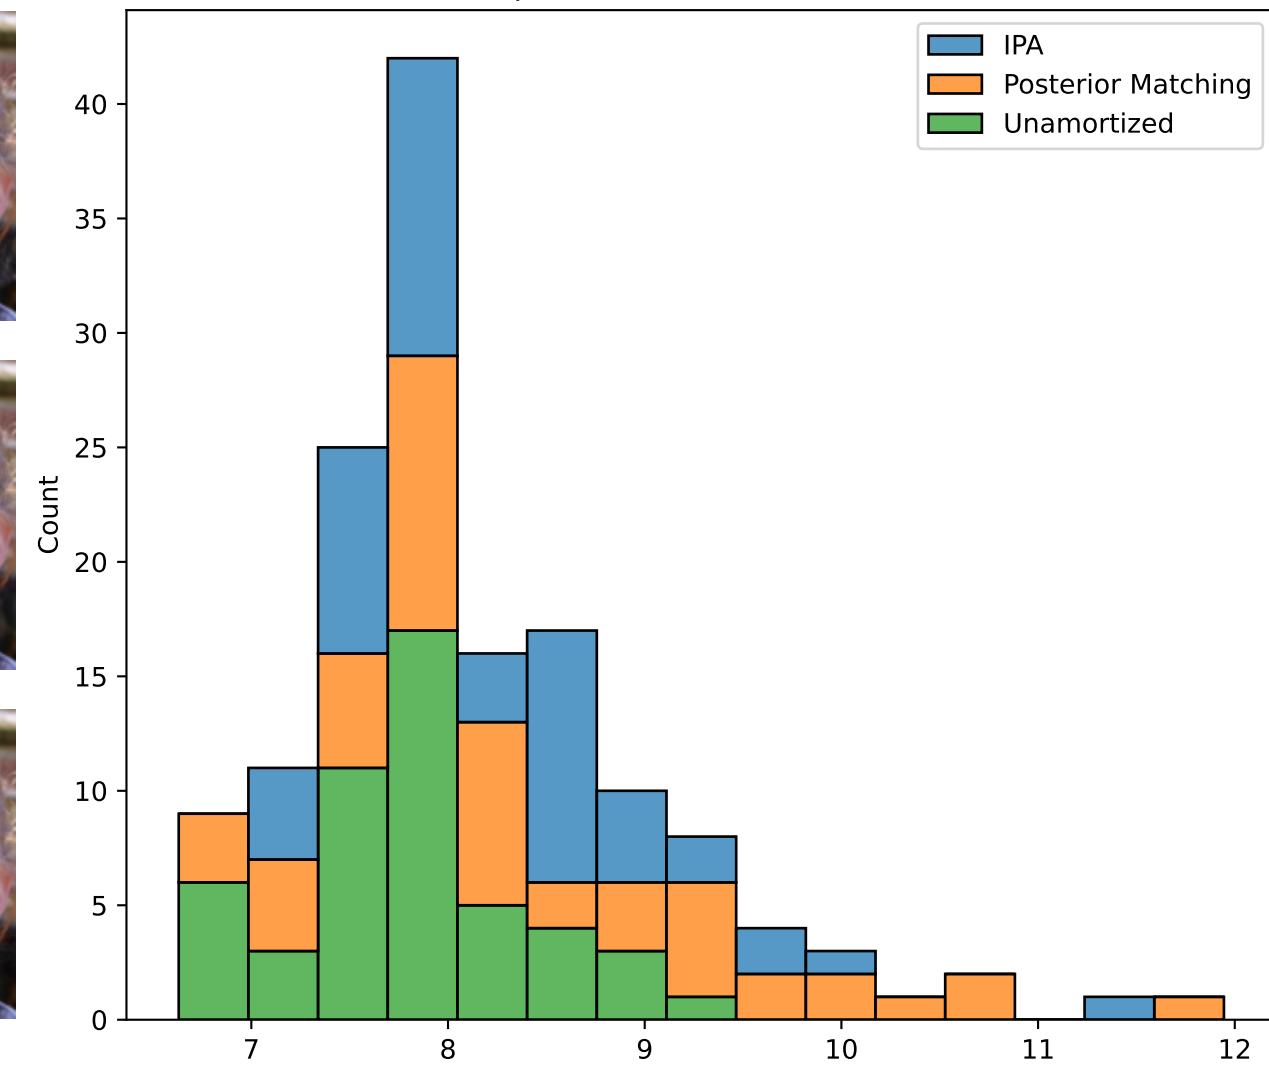

Supplement: supplementary_material [file attachment]

Truth

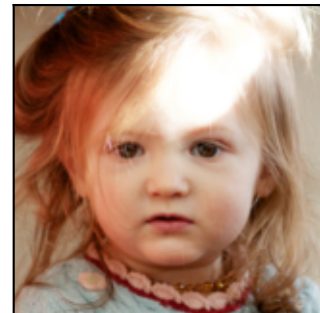

Unamortized

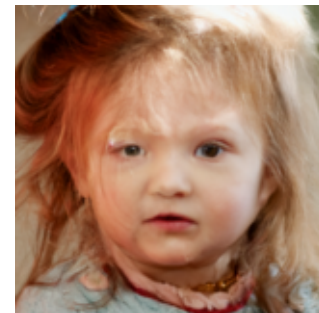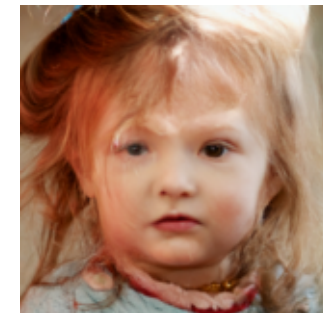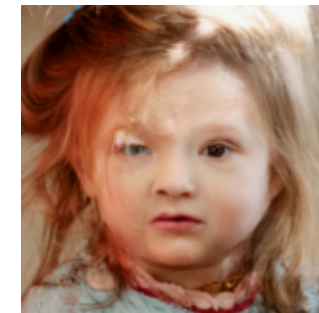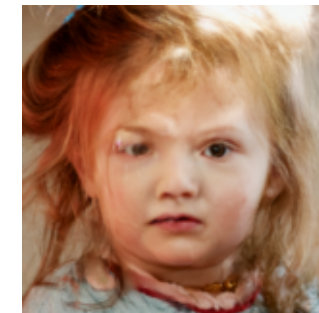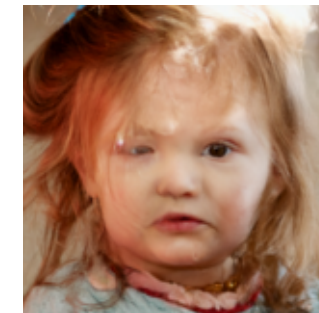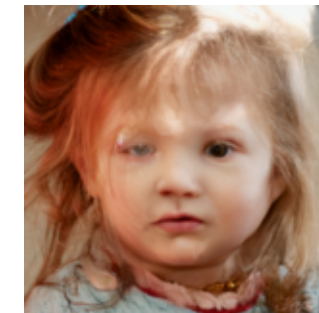

Masked

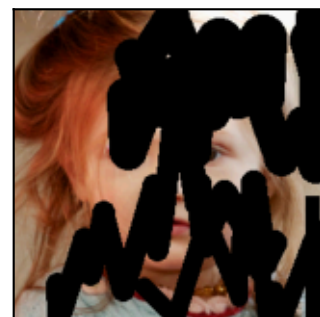

Posterior-Matching

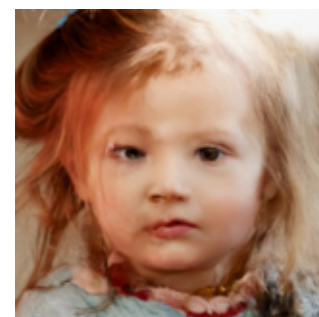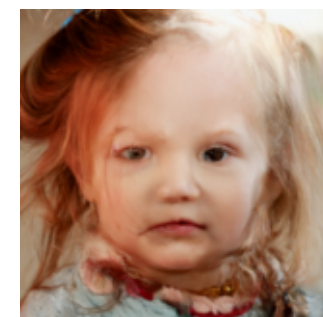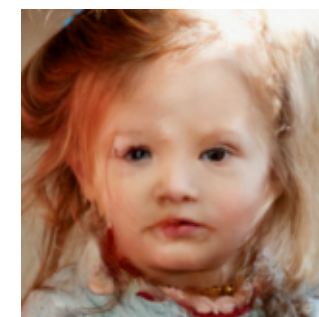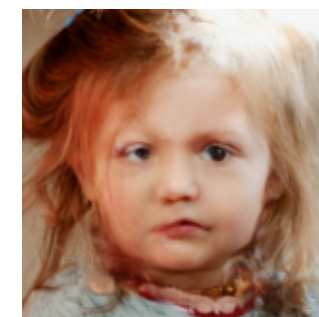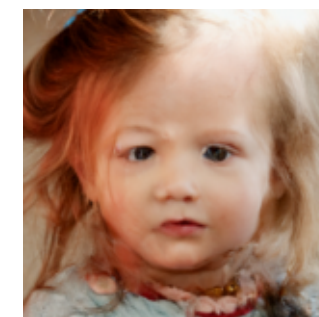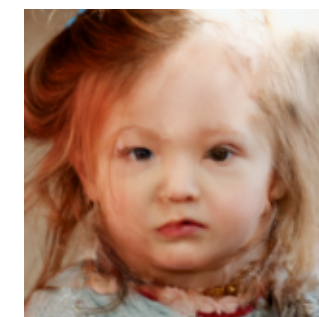

Mask

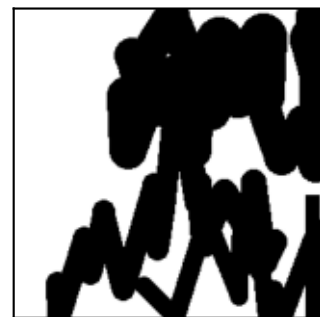

IPA

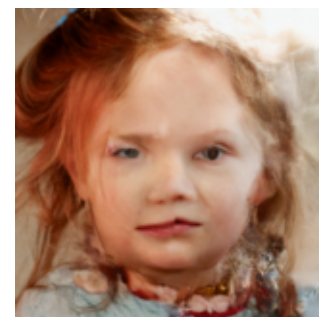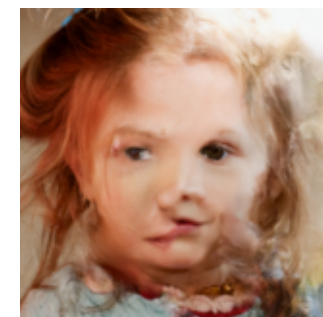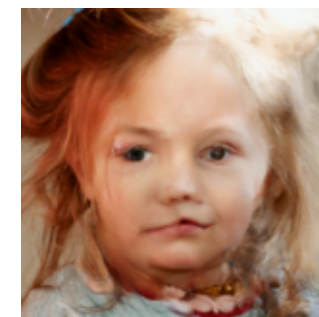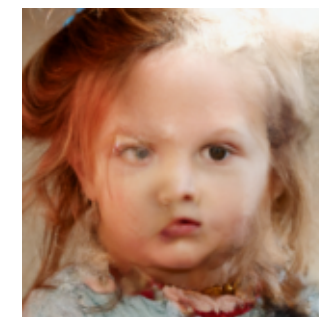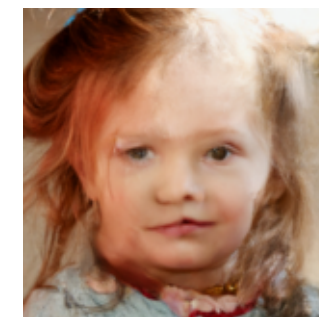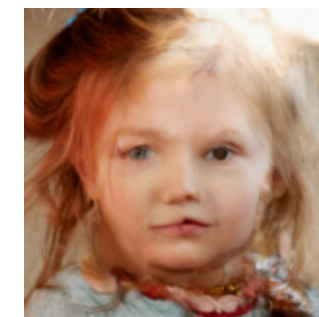

Inception distances (from truth)

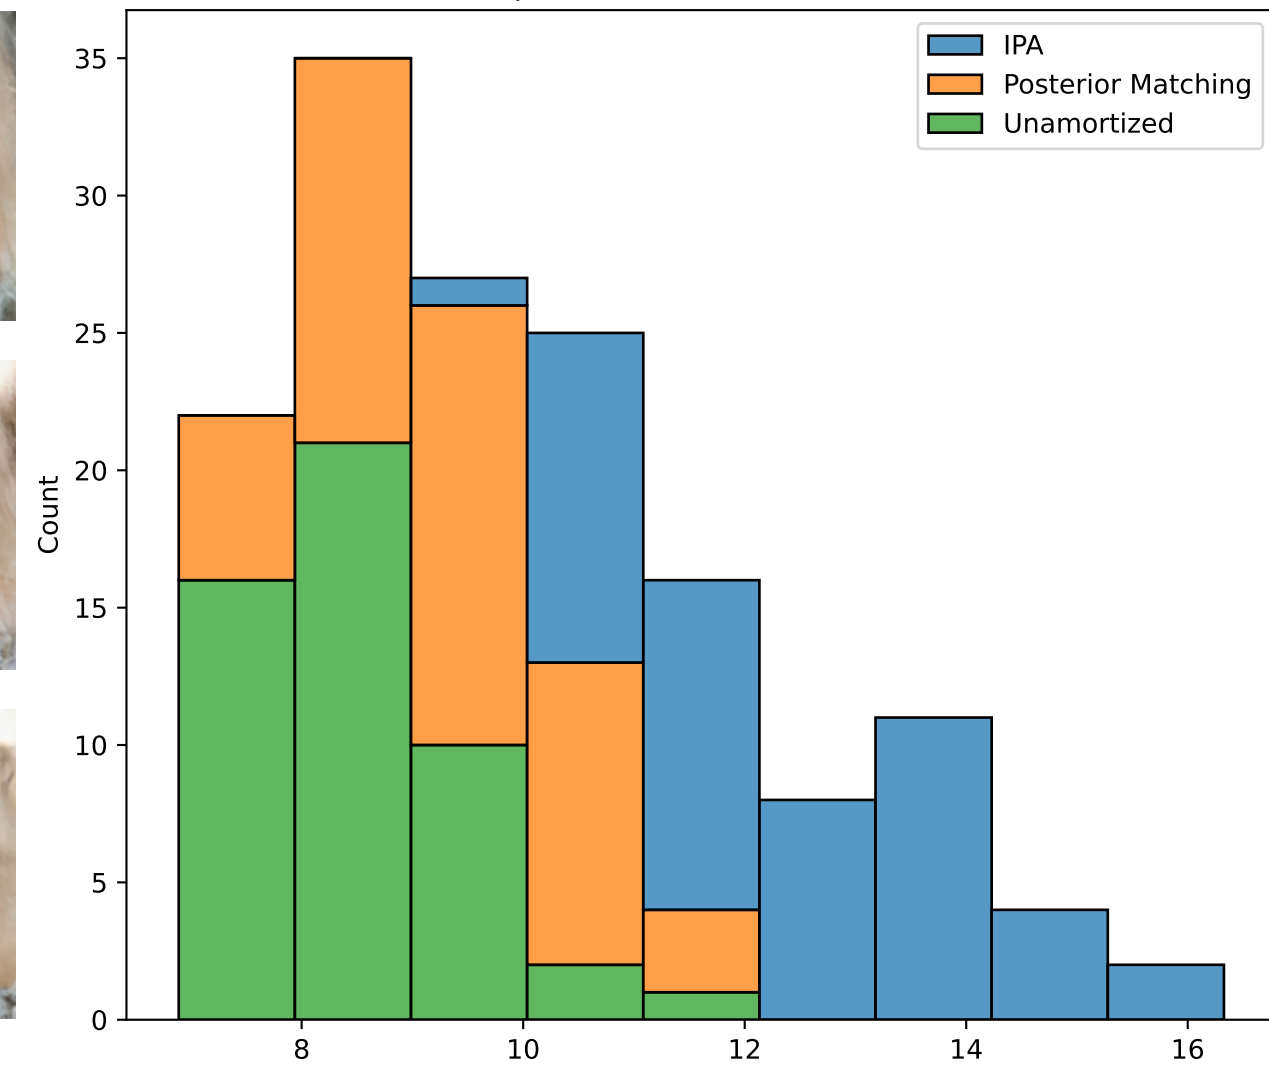

Supplement: supplementary_material [file attachment]

Truth

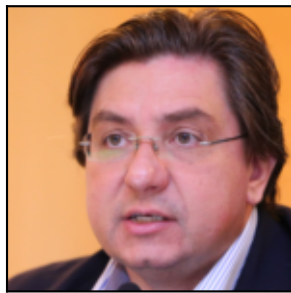

QAVI  
(Full model)

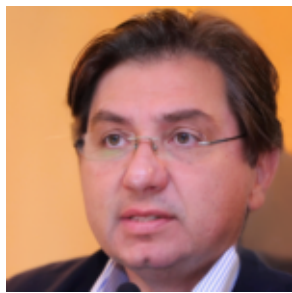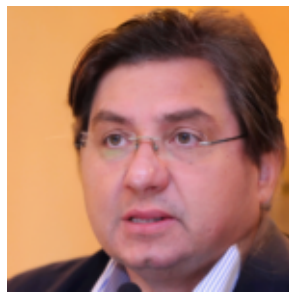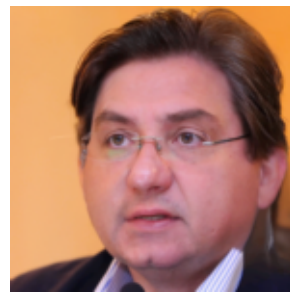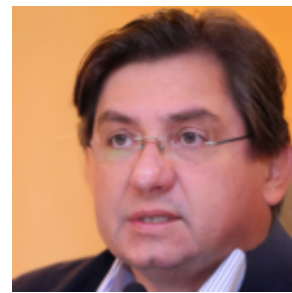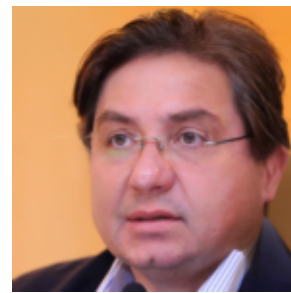

Masked

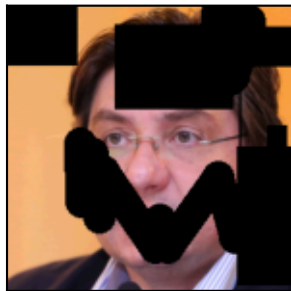

QAVI

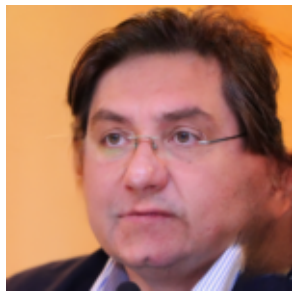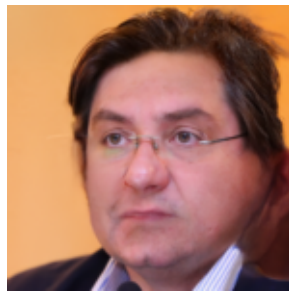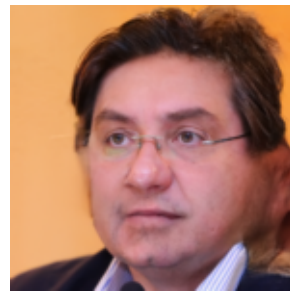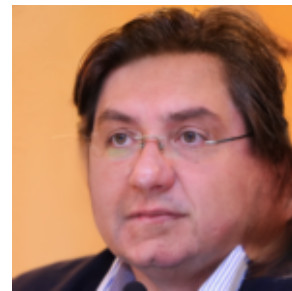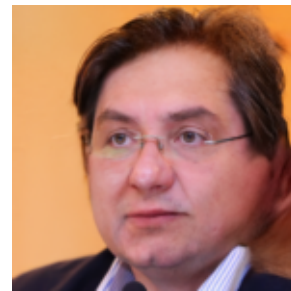

Mask

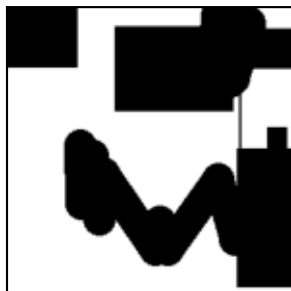

Posterior-  
Matching

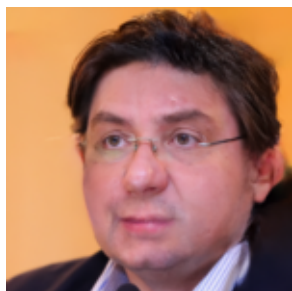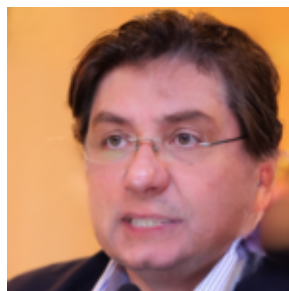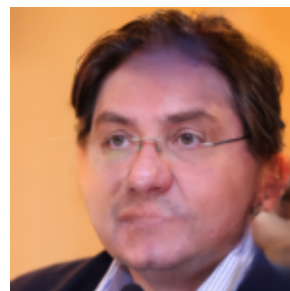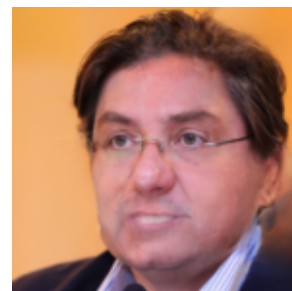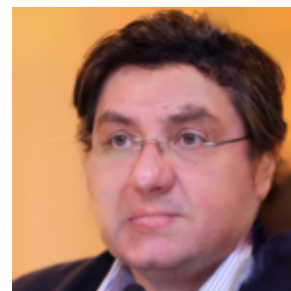

VAEAC

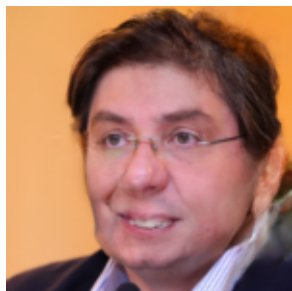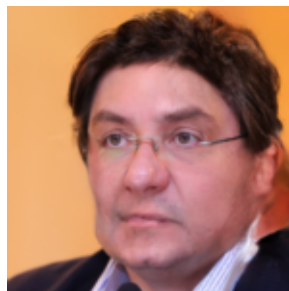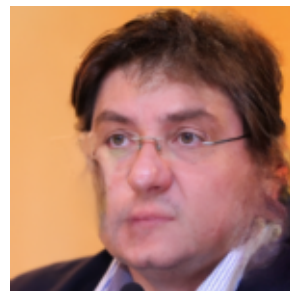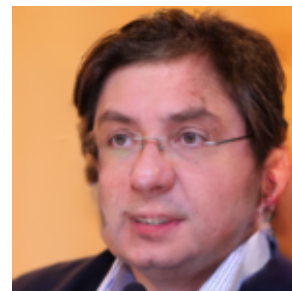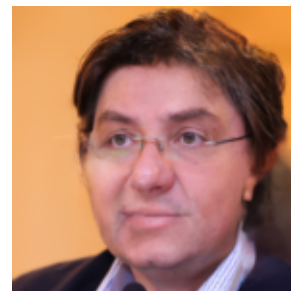

Supplement: supplementary_material [file attachment]

Truth

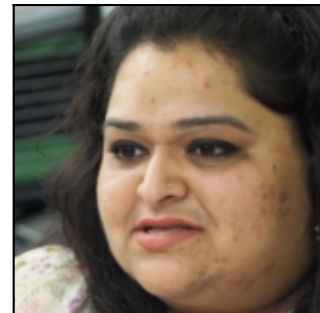

Unamortized

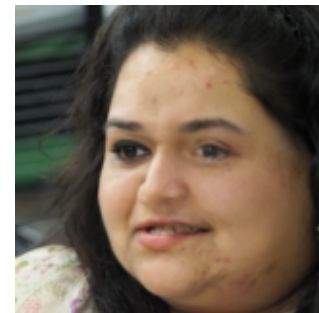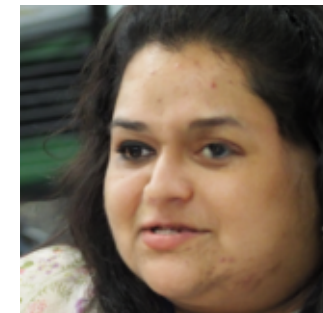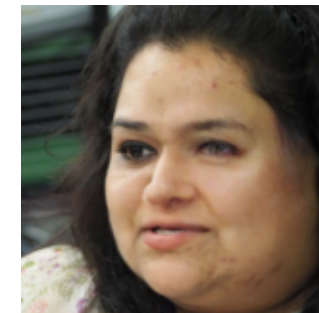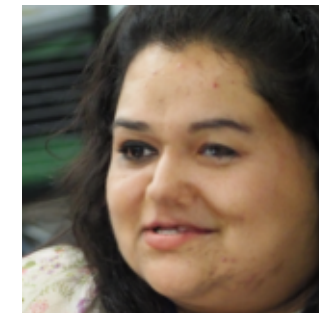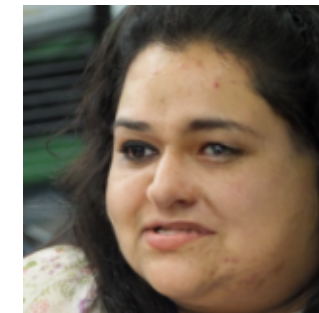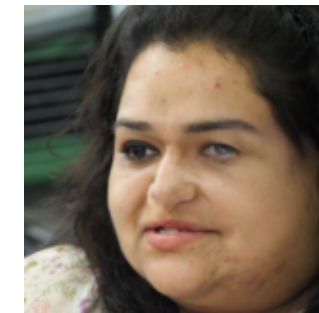

Masked

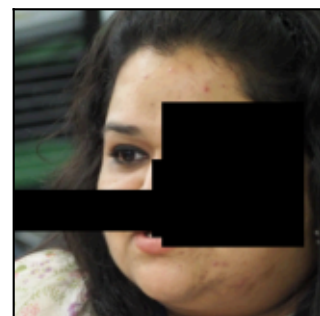

Posterior-Matching

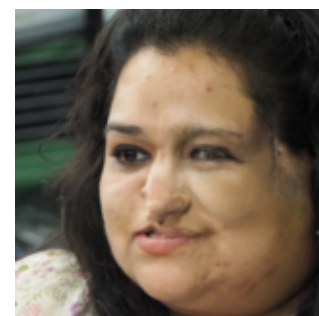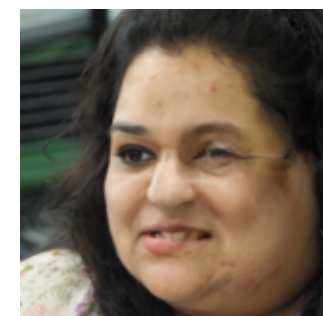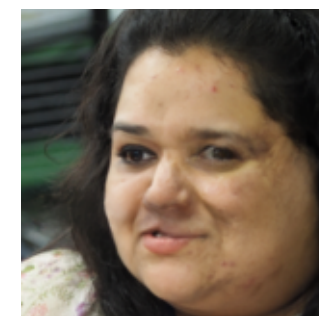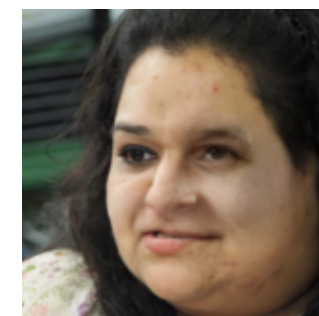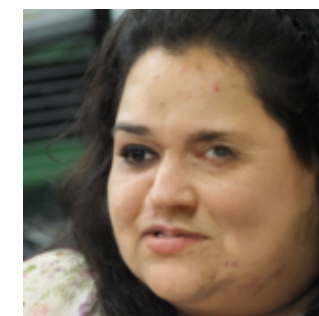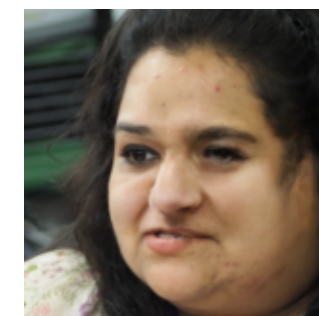

Mask

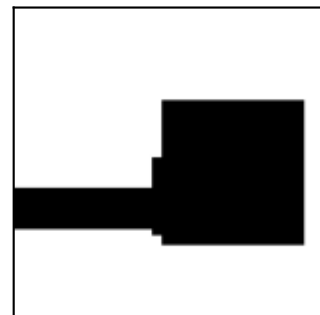

IPA

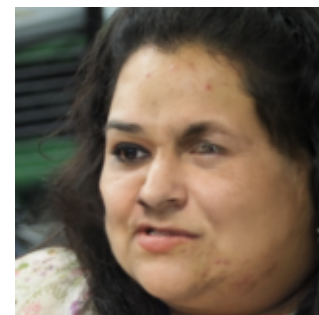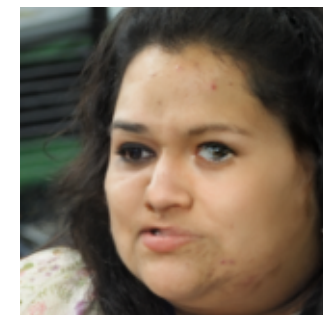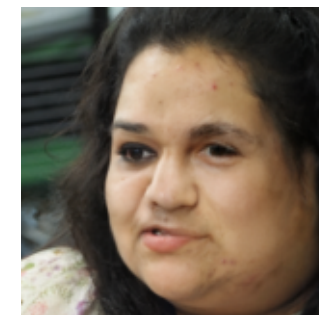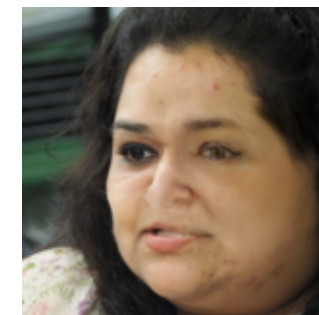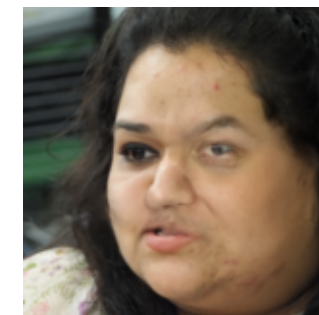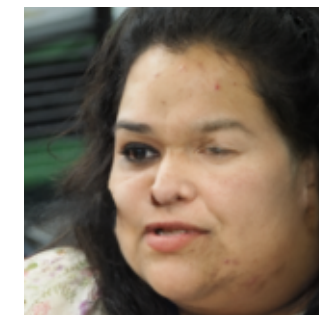

Inception distances (from truth)

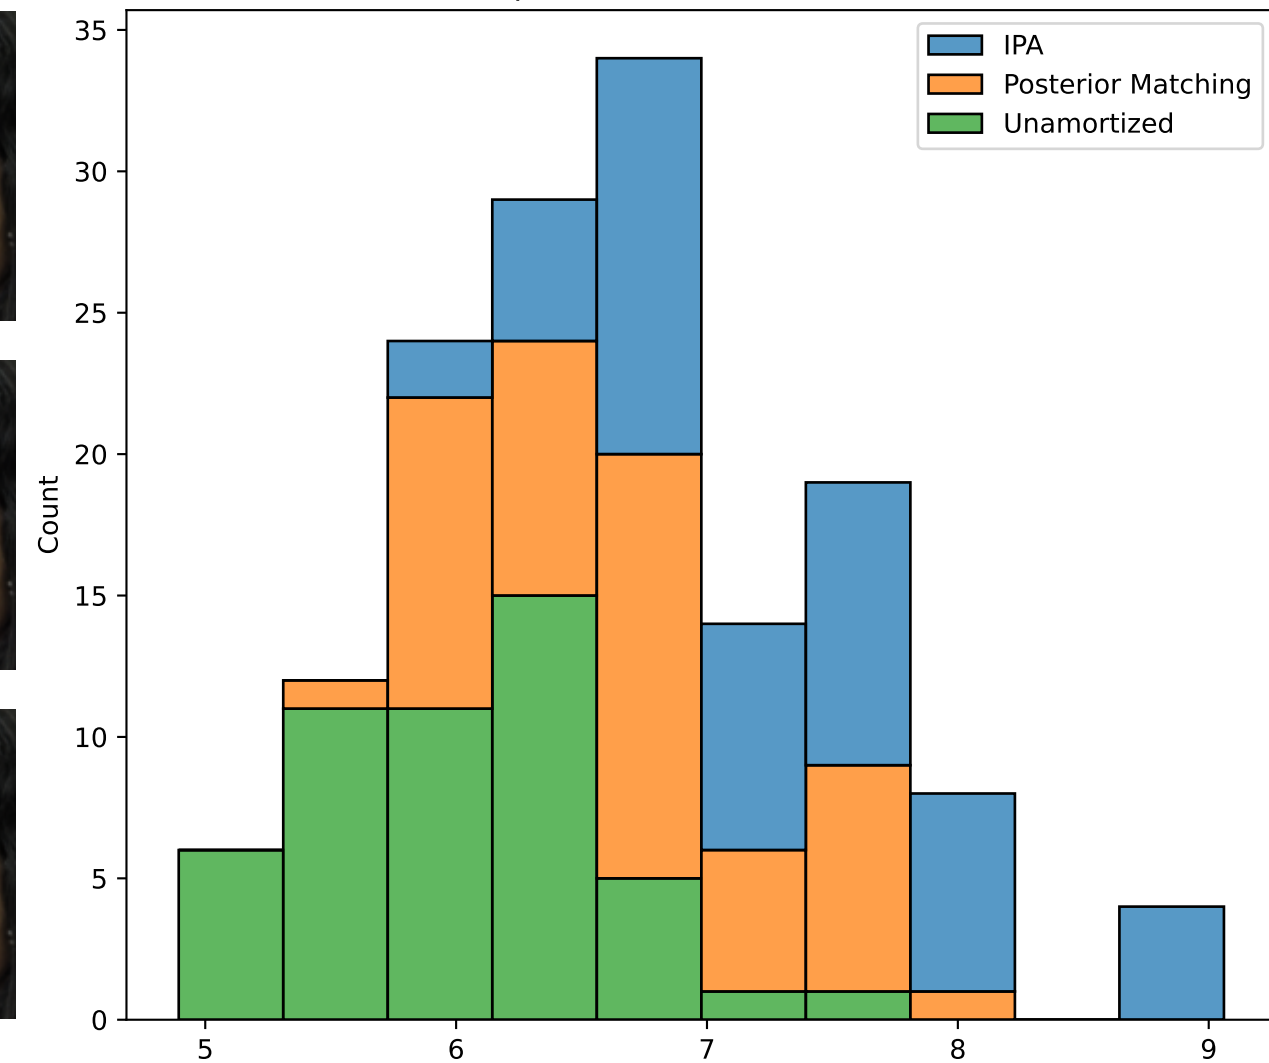

Supplement: supplementary_material [file attachment]

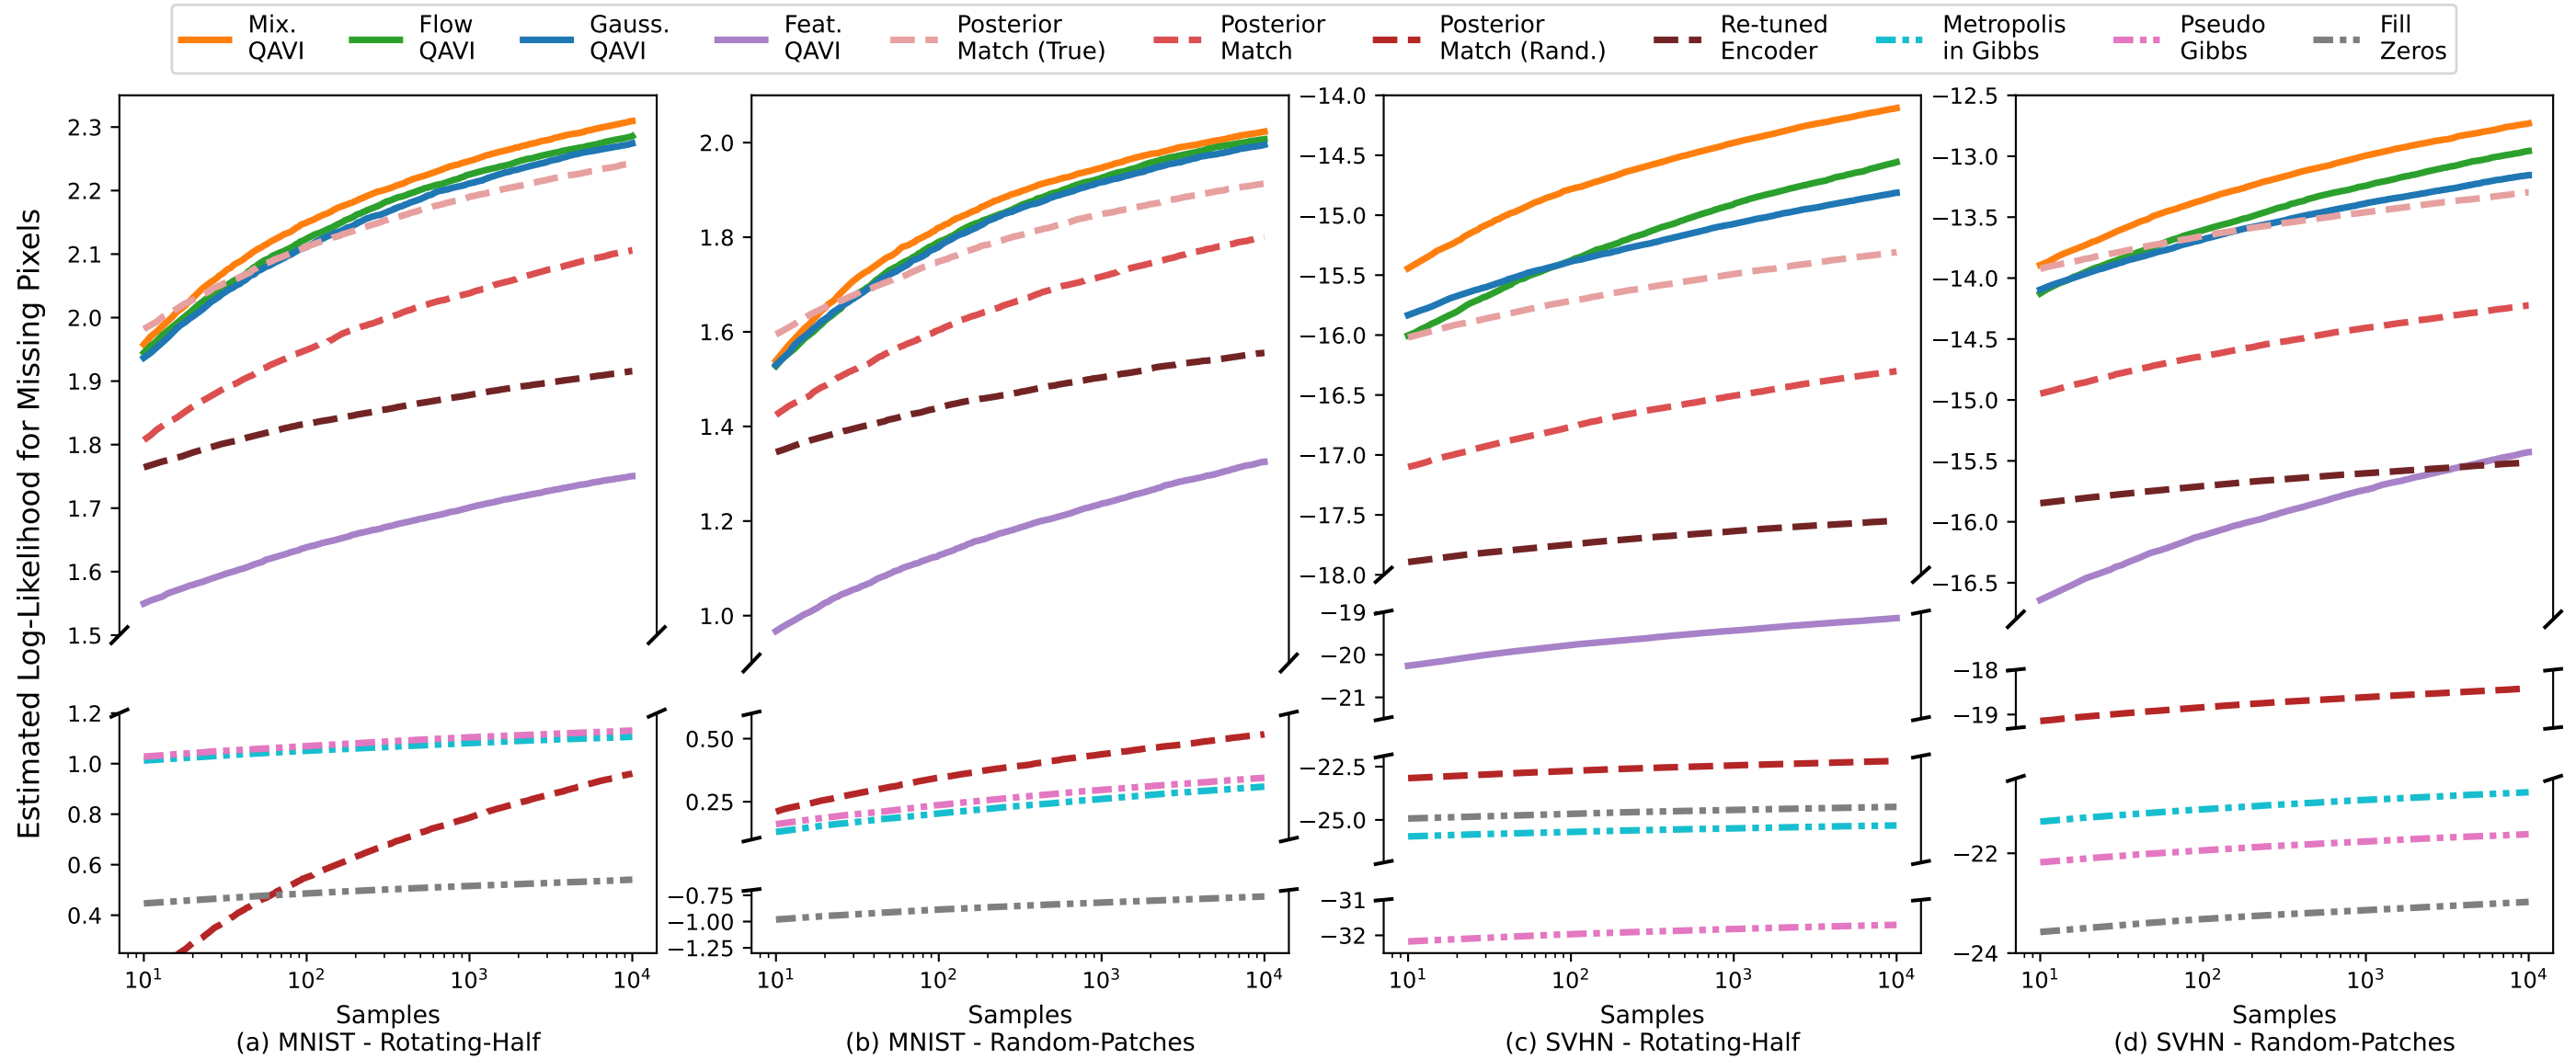

Supplement: supplementary_material [file attachment]

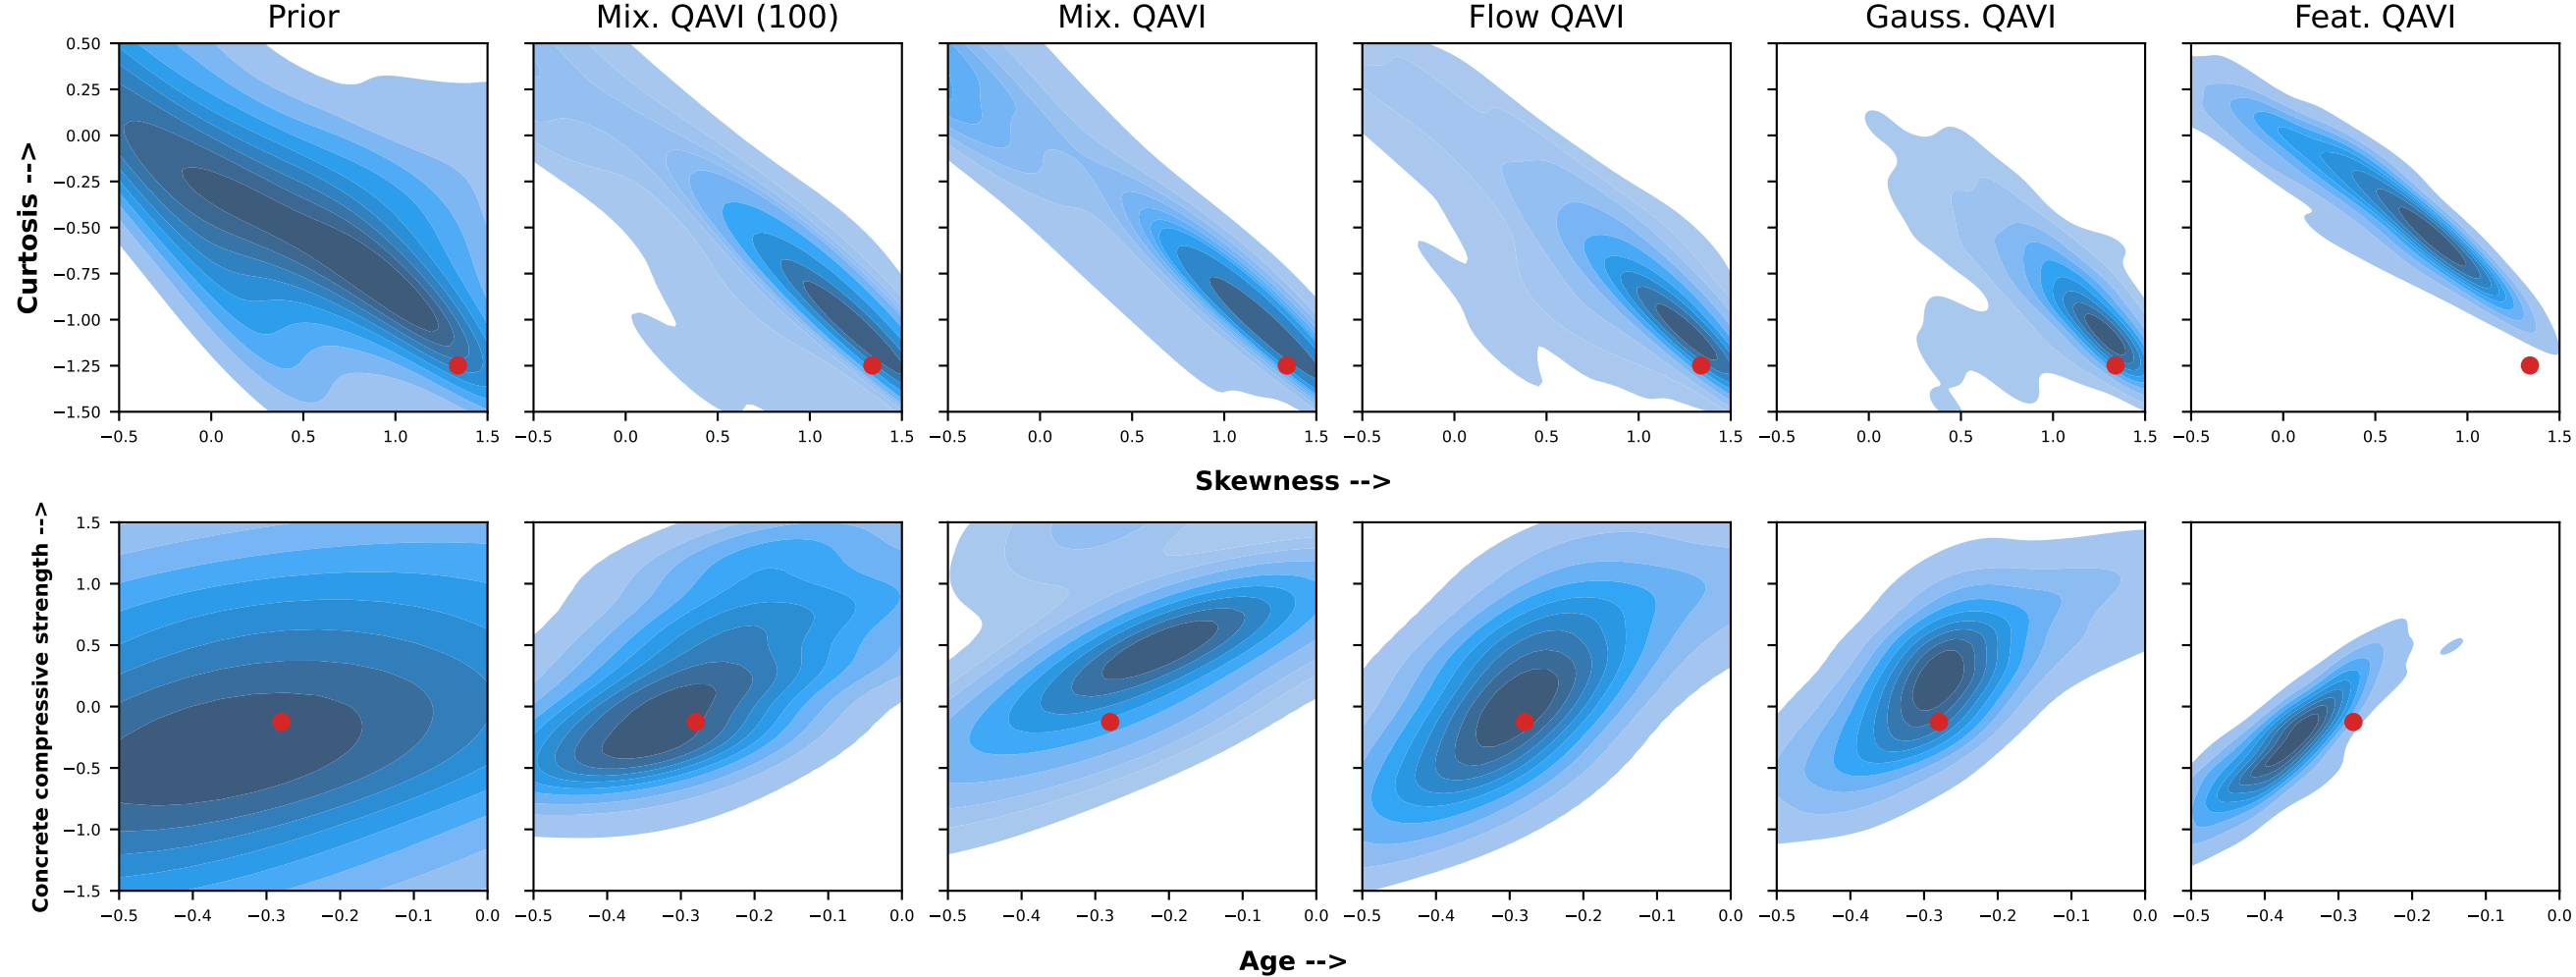

Supplement: supplementary_material [file attachment]

Truth

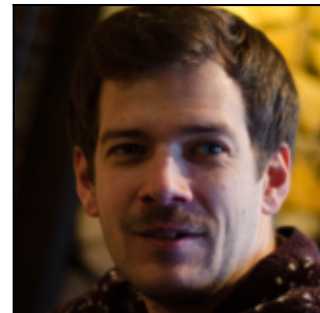

Unamortized

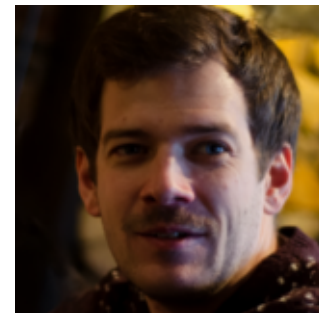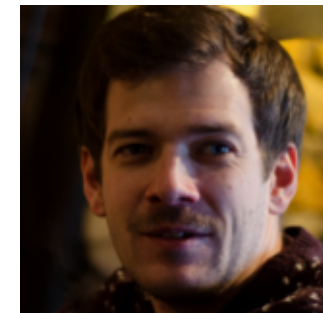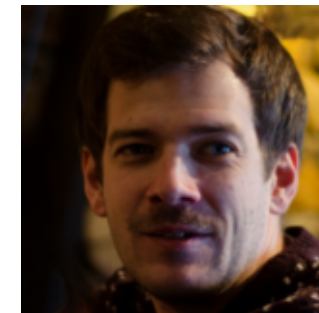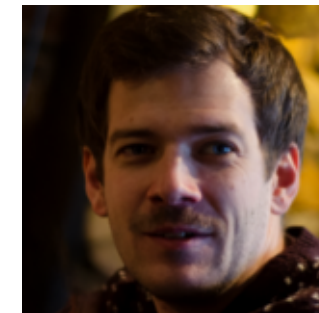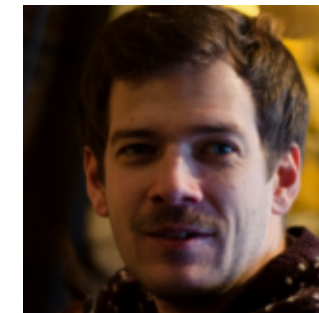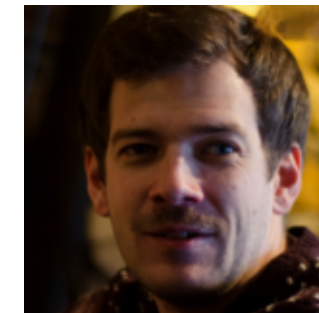

Masked

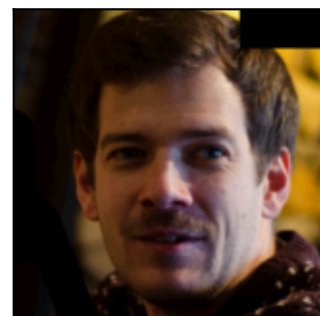

Posterior-Matching

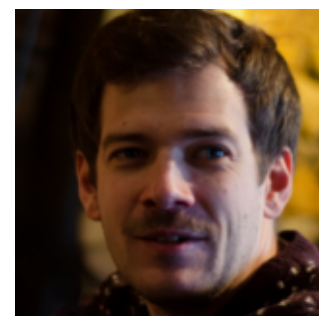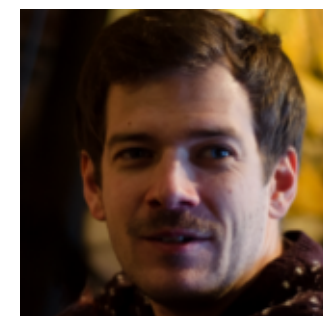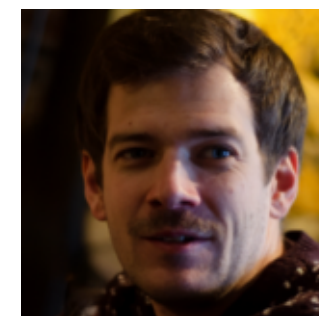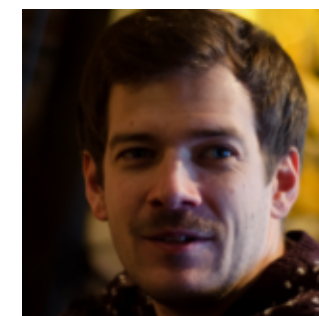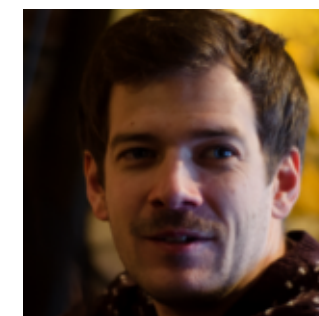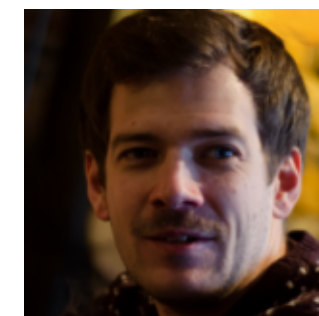

Mask

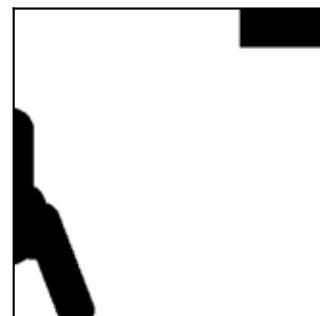

IPA

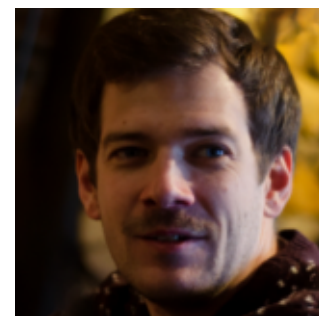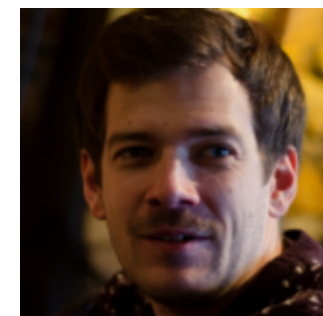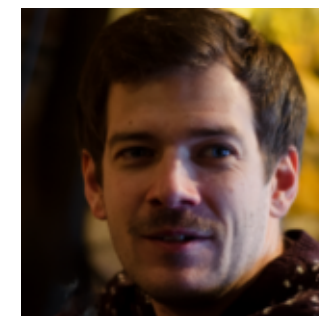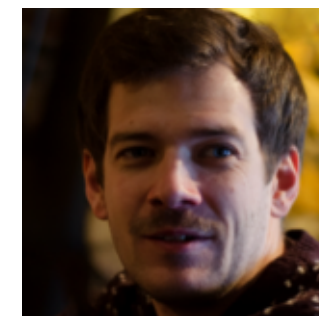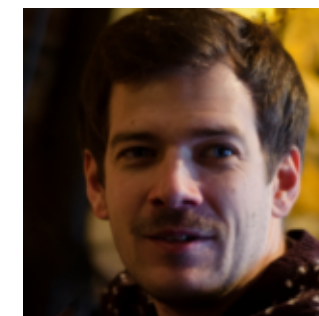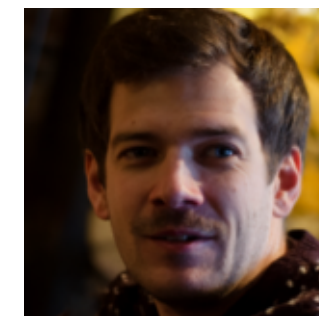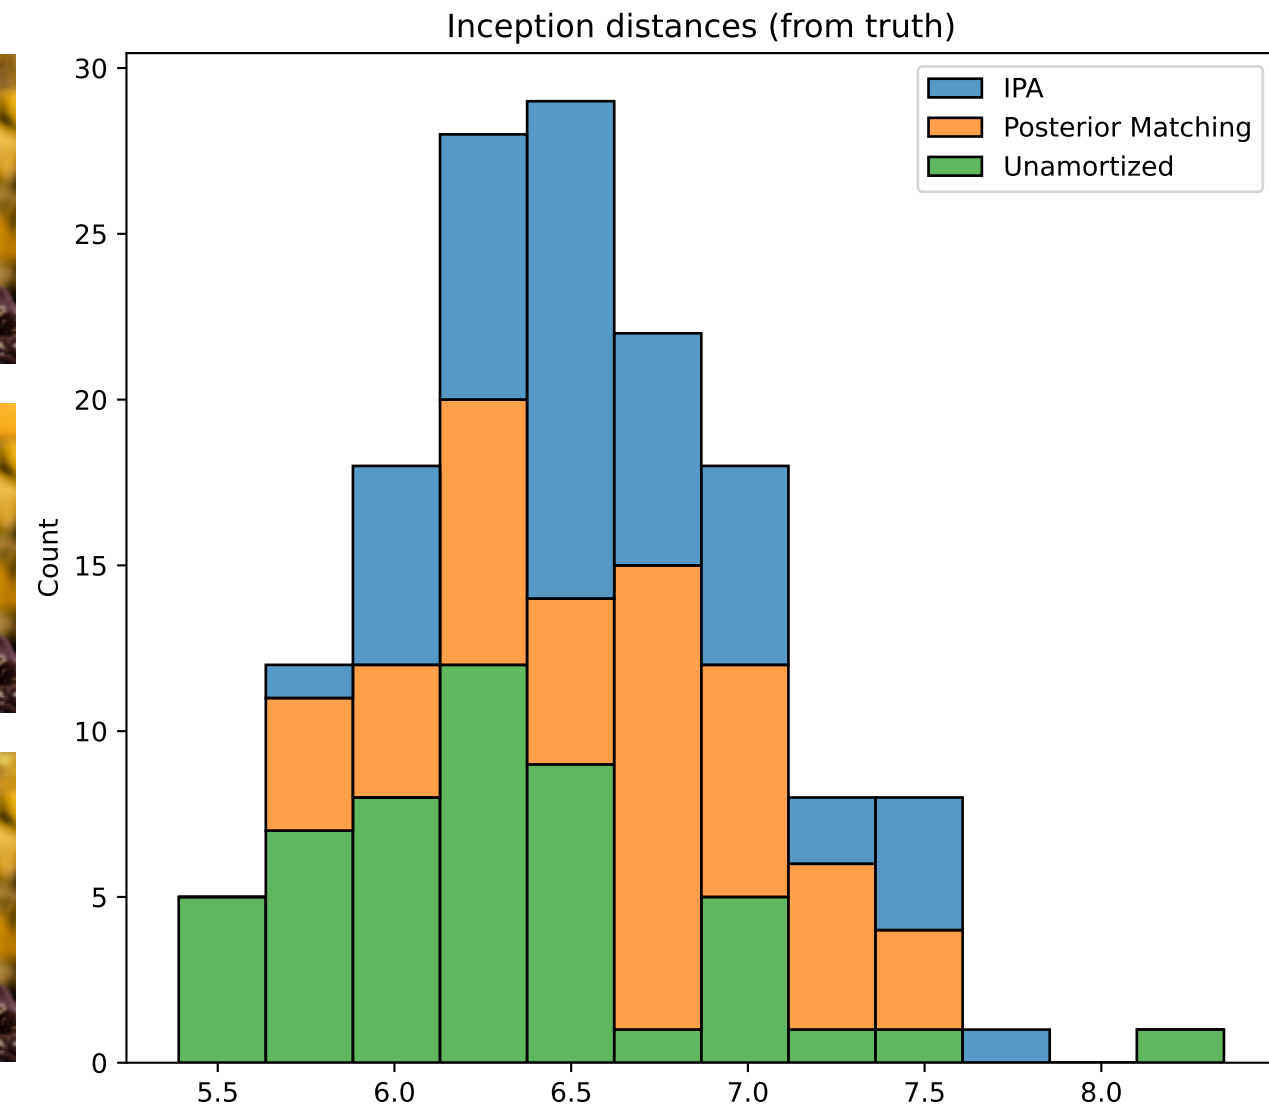

Supplement: supplementary_material [file attachment]
